# Supplementary material for: Profiling of serum metabolome of breast cancer: multi-cancer features discriminate between healthy women and patients with breast cancer
Source: Front Oncol. 2024 Apr 4;14:1377373. doi: 10.3389/fonc.2024.1377373 (PMC11027565; doi:10.3389/fonc.2024.1377373)
Supplement: Supplementary file 2 [file Table_1.xlsx]

## Sheet: Table S1
Table S1. Serum metabolites quantitated by the HRMS approach: differences between patients diagnosed with breast cancer (BC) or healthy women (Ctr_P and Ctr_N).
Metabolite class	Compound	Concentration [µM] - mean value			Concentration [µM] - median value			BC/Ctr_P Fold-Change (median)	BC/Ctr_N Fold-Change (median)	BC vs. Ctr_P difference (Mann–Whitney U test)				BC vs. Ctr_N difference (Mann–Whitney U test)				Ctr_P vs. Ctr_N difference (Mann–Whitney U test)
		BC	Ctr_P	Ctr_N	BC	Ctr_P	Ctr_N			p-value	FDR	effect size (r)	effect	p-value	FDR	effect size (r)	effect	p-value	FDR	effect size (r)	effect
AC	AC(0:0)	38.2906	41.372	40.485	37.5925	39.5693	40.0828	0.950043	0.937872	0.0184475	0.0391676	-0.164	small	0.0115399	0.0192113	-0.169	small	0.975851	0.989357	-0.00211	negligible
AC	AC(2:0)	11.0935	8.47204	7.58996	10.3465	7.68204	6.77117	1.34684	1.52802	1.14449e-07	7.79848e-07	0.368	medium	5.78251e-12	3.13755e-11	0.46	medium	0.21802	0.298504	0.0855	negligible
AC	AC(3:0)	53.9461	48.2514	56.0049	50.9334	44.9368	55.613	1.13344	0.915854	0.0480471	0.0891001	0.138	small	0.33043	0.396787	-0.065	negligible	0.00433777	0.00962853	-0.198	small
AC	AC(3:0-DC)	0.00710558	0.00681227	0.00721351	0.00654328	0.00636417	0.00677497	1.02814	0.965803	0.623194	0.699601	0.0341	negligible	0.461655	0.534643	-0.0492	negligible	0.299016	0.391123	-0.0723	negligible
AC	AC(3:0-OH)	0.0487166	0.041688	0.0515443	0.0505824	0.0406911	0.052962	1.24308	0.95507	5.78356e-05	0.000206657	0.279	small	0.0744865	0.101984	-0.119	small	8.52128e-08	4.45846e-07	-0.373	medium
AC	AC(3:1)	0.0171259	0.0163012	0.0197717	0.013753	0.0135449	0.0148018	1.01536	0.929146	0.279938	0.379043	0.0751	negligible	0.0768649	0.104751	-0.118	small	0.00531494	0.0114506	-0.194	small
AC	AC(4:0)	0.155747	0.124718	0.149489	0.0945769	0.100628	0.0981378	0.939864	0.963715	0.730374	0.792591	0.024	negligible	0.36209	0.429524	-0.0609	negligible	0.242427	0.327332	-0.0813	negligible
AC	AC(4:1)	0.0224559	0.019721	0.0240929	0.0209219	0.0168735	0.0225943	1.23993	0.925985	0.028103	0.0552629	0.153	small	0.249057	0.311853	-0.0768	negligible	0.00116071	0.00293178	-0.226	small
AC	AC(5:0)	0.180298	0.176314	0.259547	0.159034	0.153388	0.218308	1.03681	0.728484	0.480465	0.576951	0.0491	negligible	3.00063e-05	7.26598e-05	-0.279	small	8.31009e-05	0.000259027	-0.274	small
AC	AC(5:0-DC)	0.148594	0.140444	0.225038	0.145244	0.135016	0.217376	1.07576	0.66817	0.0931718	0.160586	0.117	small	3.94012e-19	4.81085e-18	-0.597	large	1.49096e-18	4.36851e-17	-0.611	large
AC	AC(5:0-OH)	0.0106987	0.0111807	0.0116604	0.00969368	0.0101553	0.012096	0.954546	0.801395	0.524965	0.61773	-0.0442	negligible	0.011073	0.0186459	-0.17	small	0.109646	0.16391	-0.111	small
AC	AC(5:1)	0.0270973	0.0233327	0.0280977	0.0264464	0.0221292	0.0260429	1.19509	1.0155	0.0193908	0.0400106	0.163	small	0.696744	0.739665	-0.0261	negligible	0.0112917	0.0220565	-0.176	small
AC	AC(6:0)	0.0723044	0.0516282	0.0511856	0.0673455	0.0506962	0.0486337	1.32841	1.38475	5.42325e-06	2.88911e-05	0.316	medium	3.0252e-09	1.10798e-08	0.396	medium	0.737387	0.818388	0.0233	negligible
AC	AC(7:0)	0.0123549	0.00914603	0.0457895	0.00535887	0.00502705	0.0306415	1.06601	0.174889	0.369985	0.472916	0.0623	negligible	1.88254e-16	1.7237e-15	-0.55	large	1.07167e-19	3.925e-18	-0.631	large
AC	AC(8:0)	0.200764	0.131529	0.108824	0.162879	0.105341	0.102918	1.5462	1.58261	6.034e-07	3.76162e-06	0.347	medium	2.62266e-11	1.28073e-10	0.446	medium	0.290434	0.381601	0.0737	negligible
AC	AC(8:1)	0.208122	0.173271	0.165078	0.174941	0.14993	0.150991	1.16681	1.15862	0.00505364	0.0123393	0.195	small	0.00175999	0.00337044	0.209	small	0.843101	0.898286	0.0138	negligible
AC	AC(10:0)	0.313436	0.187372	0.150904	0.247982	0.152936	0.125427	1.62148	1.97711	5.6952e-10	6.67477e-09	0.431	medium	7.93961e-18	8.61595e-17	0.575	large	0.0583412	0.0960335	0.131	small
AC	AC(10:1)	0.0790104	0.0616935	0.0631001	0.066155	0.0540986	0.0542553	1.22286	1.21933	0.00200143	0.00533109	0.215	small	0.0025212	0.00464598	0.202	small	0.721637	0.803953	-0.0247	negligible
AC	AC(10:2)	0.0223536	0.020033	0.0259093	0.0191972	0.016514	0.0204007	1.16248	0.941007	0.0184434	0.0391676	0.164	small	0.512011	0.586015	-0.0438	negligible	0.0175382	0.0329404	-0.165	small
AC	AC(10:3)	0.0695665	0.0628633	0.0582406	0.0615789	0.0607716	0.0525571	1.01328	1.17166	0.257765	0.357939	0.0785	negligible	0.0202448	0.0320634	0.155	small	0.189861	0.267449	0.0911	negligible
AC	AC(12:0)	0.0893615	0.0581851	0.0567063	0.0806958	0.0506121	0.0473886	1.5944	1.70285	2.54808e-08	2.13311e-07	0.387	medium	7.22071e-10	2.85901e-09	0.412	medium	0.839458	0.898286	0.0141	negligible
AC	AC(12:1)	0.120407	0.0750923	0.0703416	0.112625	0.0676743	0.0591359	1.66422	1.90451	1.24406e-10	1.73576e-09	0.447	medium	2.62268e-15	2.13457e-14	0.529	large	0.868685	0.912275	0.0115	negligible
AC	AC(13:0)	0.0417651	0.0466904	0.189719	0.036182	0.037854	0.140179	0.955829	0.258112	0.185184	0.276831	-0.0917	negligible	9.25608e-31	3.39004e-29	-0.768	large	2.44979e-26	2.39263e-24	-0.737	large
AC	AC(14:0)	0.030279	0.0265313	0.0313808	0.0278665	0.02316	0.0290058	1.20322	0.960723	0.00183506	0.00493277	0.217	small	0.570684	0.633373	-0.0379	negligible	0.000418918	0.00115795	-0.245	small
AC	AC(14:0-OH)	0.00822733	0.0069403	0.00623802	0.00981866	0.00194398	0.00197105	5.0508	4.98143	0.391486	0.496561	0.0596	negligible	0.0452647	0.0663155	0.134	small	0.628141	0.736181	0.0336	negligible
AC	AC(14:1)	0.144999	0.0886177	0.0805149	0.134251	0.0749034	0.0672853	1.79232	1.99525	5.47934e-12	1.0034e-10	0.479	medium	3.1498e-16	2.79664e-15	0.546	large	0.278904	0.368105	0.0751	negligible
AC	AC(14:2)	0.0362081	0.0221629	0.0197557	0.0342135	0.0180084	0.00656901	1.89986	5.20832	5.85914e-06	3.06559e-05	0.315	medium	7.03813e-09	2.45497e-08	0.387	medium	0.108117	0.162453	0.112	small
AC	AC(16:0)	0.122665	0.119361	0.0911533	0.118365	0.113087	0.0890889	1.04668	1.32862	0.344455	0.448557	0.0657	negligible	1.34524e-14	9.61353e-14	0.514	large	1.74079e-10	1.43873e-09	0.443	medium
AC	AC(16:1)	0.0354096	0.0246024	0.0223264	0.0336509	0.0196562	0.0216817	1.71197	1.55204	1.00692e-07	7.1958e-07	0.37	medium	1.09307e-09	4.27027e-09	0.408	medium	0.52497	0.627824	0.0442	negligible
AC	AC(18:0)	0.0448564	0.0495341	0.0410192	0.0413634	0.0464608	0.0405608	0.890285	1.01979	0.0644724	0.114487	-0.129	small	0.648608	0.701262	0.0305	negligible	0.0100793	0.0202277	0.179	small
AC	AC(18:1)	0.186708	0.18299	0.118098	0.178356	0.172372	0.111465	1.03472	1.60012	0.535654	0.625285	0.043	negligible	3.32223e-21	4.86706e-20	0.631	large	7.37105e-17	1.43981e-15	0.58	large
AC	AC(18:2)	0.0647598	0.0854965	0.0576652	0.0640399	0.0811798	0.0554928	0.788865	1.15402	7.08763e-09	6.29295e-08	-0.402	medium	0.00128756	0.00249837	0.215	small	4.45738e-14	5.93642e-13	0.525	large
AA	Ala	343.342	435.466	404.934	331.074	436.653	405.732	0.758209	0.815992	3.02967e-13	6.34066e-12	-0.507	large	7.37725e-08	2.20568e-07	-0.359	medium	0.0129703	0.025002	0.172	small
AA	Arg	102.56	99.0552	156.462	101.613	97.2143	154.084	1.04524	0.659463	0.169487	0.259998	0.0952	negligible	4.36602e-13	2.55849e-12	-0.484	medium	1.64868e-13	2.01277e-12	-0.512	large
AA	Asn	45.1725	61.5322	55.7889	45.0601	60.1896	55.1873	0.748637	0.816494	7.2858e-20	4.26948e-18	-0.634	large	1.58554e-13	9.88434e-13	-0.493	medium	0.000249443	0.000716538	0.254	small
AA	Asp	18.5542	38.1889	41.896	17.5546	36.4096	40.4576	0.482142	0.433901	5.84823e-26	8.56765e-24	-0.73	large	2.46118e-35	4.31712e-33	-0.829	large	0.0102166	0.0203636	-0.179	small
AA	Cit	28.4066	29.8354	29.7446	27.6424	28.7927	27.7178	0.96005	0.997279	0.271732	0.370314	-0.0765	negligible	0.553995	0.621918	-0.0396	negligible	0.685352	0.778326	0.0281	negligible
AA	Gln	660.059	629.305	661.634	652.382	621.684	664.618	1.04938	0.98159	0.0220803	0.0452416	0.159	small	0.533472	0.603504	-0.0416	negligible	0.0220804	0.0409466	-0.159	small
AA	Glu	52.9562	125.815	111.464	50.9453	127.075	101.16	0.400906	0.503611	2.47729e-27	7.25845e-25	-0.751	large	2.61615e-32	1.09505e-30	-0.788	large	0.00874245	0.0177885	0.182	small
AA	Gly	286.21	347.024	358.489	264.056	317.889	351.881	0.830654	0.750412	4.07937e-05	0.000155228	-0.285	small	1.50897e-10	6.6989e-10	-0.428	medium	0.092719	0.141493	-0.117	small
AA	His	82.8451	99.3448	98.9433	82.5835	100.148	97.3001	0.824615	0.848751	2.37669e-14	5.80309e-13	-0.53	large	1.05561e-14	7.93062e-14	-0.516	large	0.695649	0.783943	0.0272	negligible
AA	Lys	156.446	183.049	166.62	156.457	175.832	165.747	0.889812	0.943954	6.99037e-09	6.29295e-08	-0.402	medium	0.030068	0.0466134	-0.145	small	0.000722008	0.00190584	0.235	small
AA	Met	21.475	27.1015	25.2561	21.256	26.0141	24.3502	0.817095	0.872928	4.68774e-11	7.22898e-10	-0.457	medium	6.37223e-06	1.60954e-05	-0.301	medium	0.0442324	0.0762358	0.14	small
AA	Orn	79.9437	134.443	87.3773	80.7948	132.14	84.2541	0.611434	0.958943	2.33448e-21	1.71e-19	-0.66	large	0.0311809	0.0478325	-0.144	small	8.01254e-18	1.95639e-16	0.598	large
AA	Phe	62.4581	86.3881	109.04	61.3574	85.9333	108.402	0.714011	0.566017	4.11859e-23	4.02249e-21	-0.688	large	2.94684e-35	4.31712e-33	-0.829	large	1.62482e-14	2.38036e-13	-0.534	large
AA	Pro	157.401	194.862	213.114	155.636	186.008	205.945	0.836714	0.755716	5.28288e-07	3.43974e-06	-0.349	medium	1.5371e-13	9.79068e-13	-0.493	medium	0.0524161	0.0867678	-0.135	small
AA	Ser	129.623	162.826	178.943	125.096	165.554	175.375	0.75562	0.713302	2.69644e-12	5.26705e-11	-0.486	medium	1.71761e-22	2.79589e-21	-0.652	large	0.00120915	0.00302804	-0.225	small
AA	Thr	116.285	140.269	131.582	112.74	139.802	132.973	0.806425	0.847844	5.48308e-08	4.46262e-07	-0.377	medium	0.000415409	0.000875647	-0.236	small	0.0409051	0.0713404	0.142	small
AA	Trp	56.5266	64.4357	65.7734	56.0358	62.4461	63.7046	0.897347	0.879619	5.4127e-07	3.44765e-06	-0.348	medium	3.18119e-09	1.15073e-08	-0.396	medium	0.407122	0.518638	-0.0576	negligible
AA	Tyr	59.1163	70.7007	75.8632	59.3004	70.3928	74.8639	0.842421	0.792109	1.69544e-07	1.12901e-06	-0.364	medium	3.61852e-11	1.73408e-10	-0.442	medium	0.0675609	0.107583	-0.127	small
AA	Val	194.014	221.852	225.281	194.347	219.013	215.239	0.887374	0.902934	8.77912e-06	4.3598e-05	-0.309	medium	2.13226e-06	5.6284e-06	-0.317	medium	0.767437	0.842169	-0.0206	negligible
AA	Leu+Ile	162.828	219.367	212.054	161.048	208.642	201.102	0.771887	0.800829	1.46363e-16	4.76493e-15	-0.574	large	4.23222e-15	3.35146e-14	-0.525	large	0.257767	0.344867	0.0785	negligible
BA	ADMA	0.49599	0.516894	0.478721	0.484385	0.519219	0.482556	0.93291	1.00379	0.0388816	0.0730275	-0.144	small	0.16712	0.214764	0.0922	negligible	0.00198587	0.00473056	0.215	small
BA	Creatinine	64.2414	64.6775	64.2726	63.6676	60.7777	63.0202	1.04755	1.01027	0.808648	0.846192	0.0168	negligible	0.812559	0.853332	0.0158	negligible	0.84128	0.898286	-0.0139	negligible
BA	Kynurenine	1.87069	1.96764	1.98575	1.7927	1.90585	1.91225	0.940627	0.937479	0.144287	0.231016	-0.101	small	0.094881	0.126941	-0.112	small	0.894408	0.935934	-0.00924	negligible
BA	Met-SO	0.71595	1.06688	1.73244	0.70672	1.01572	1.36775	0.69578	0.516705	2.5809e-10	3.15084e-09	-0.439	medium	3.62675e-28	8.17414e-27	-0.735	large	5.99963e-09	3.74019e-08	-0.405	medium
BA	Putrescine	0.211021	0.151941	0.111689	0.211744	0.151879	0.102972	1.39416	2.05633	1.14446e-07	7.79848e-07	0.368	medium	1.28811e-16	1.25805e-15	0.553	large	1.14913e-05	4.00826e-05	0.305	medium
BA	Sarcosine	1.19428	1.25634	1.19745	1.09276	1.12602	1.22258	0.970464	0.893818	0.231352	0.329058	-0.0834	negligible	0.315293	0.383323	-0.0668	negligible	0.854047	0.905311	0.0128	negligible
BA	SDMA	0.501421	0.465028	0.470845	0.480711	0.458006	0.454462	1.04957	1.05776	0.00575044	0.0135877	0.192	small	0.00781552	0.0133915	0.178	small	0.957288	0.977301	-0.00373	negligible
BA	Serotonin	0.597257	0.501592	0.621951	0.553755	0.456106	0.583827	1.21409	0.94849	0.0239014	0.0486327	0.157	small	0.236584	0.300083	-0.0788	negligible	0.000390517	0.00108973	-0.247	small
BA	t4-OH-Pro	10.3006	13.9402	10.8256	9.06801	12.0965	9.57344	0.74964	0.947205	0.000155828	0.000475601	-0.263	small	0.276278	0.340124	-0.0728	negligible	0.00305711	0.007109	0.206	small
BA	Taurine	141.688	152.832	130.059	142.471	154.422	129.489	0.922606	1.10025	0.029623	0.0578635	-0.152	small	0.00118079	0.00230647	0.216	small	3.35955e-08	1.82287e-07	0.384	medium
CE	CE(16:0)	247.578	225.125	232.05	273.833	209.731	225.524	1.30564	1.21421	0.0191531	0.0398003	0.163	small	0.0338576	0.0513963	0.142	small	0.830369	0.894478	-0.0149	negligible
CE	CE(16:1)	232.698	210.206	250.557	198.825	182.522	239.081	1.08932	0.831622	0.154133	0.241503	0.0994	negligible	0.0711967	0.0983993	-0.12	small	0.00219815	0.00515247	-0.213	small
CE	CE(17:0)	8.51256	6.94545	9.40211	8.21366	7.09258	8.10733	1.15806	1.01312	2.39987e-05	0.00010654	0.293	small	0.551236	0.621201	-0.0398	negligible	0.000469627	0.00128599	-0.243	small
CE	CE(17:1)	16.6509	15.9955	25.0408	15.6271	15.3867	23.6938	1.01563	0.659544	0.431249	0.533147	0.0547	negligible	8.0095e-15	6.17575e-14	-0.519	large	2.61927e-15	4.03918e-14	-0.55	large
CE	CE(17:2)	2.81723	2.3486	3.91654	2.71936	1.81019	3.87982	1.50225	0.700898	0.0164659	0.0357372	0.167	small	4.61235e-06	1.19595e-05	-0.306	medium	1.20673e-10	1.03992e-09	-0.448	medium
CE	CE(18:1)	939.943	947.973	603.03	791.71	720.029	478.273	1.09955	1.65535	0.43535	0.533165	0.0542	negligible	6.16957e-07	1.73816e-06	0.333	medium	0.000223573	0.000655069	0.256	small
CE	CE(18:2)	6122.68	6465.46	6963.79	6200.2	6325.28	6688.28	0.980226	0.927026	0.171667	0.261722	-0.0952	negligible	0.000470358	0.000970527	-0.234	small	0.0491099	0.0826965	-0.137	small
CE	CE(18:3)	335.785	285.411	267.938	305.141	262.163	262.277	1.16393	1.16343	0.0346855	0.0659926	0.147	small	0.00218338	0.00407472	0.204	small	0.438096	0.546222	0.0539	negligible
CE	CE(19:2)	10.8554	10.3275	9.91168	10.0364	8.88476	8.47248	1.12962	1.18459	0.246201	0.345153	0.0806	negligible	0.08892	0.120063	0.114	small	0.600329	0.715026	0.0364	negligible
CE	CE(19:3)	4.06695	3.49759	4.40447	3.62434	2.95192	3.70497	1.22779	0.978237	0.0535597	0.0968703	0.134	small	0.990129	0.990129	-0.000829	negligible	0.0592764	0.0970278	-0.131	small
CE	CE(20:4)	1565.07	1495.23	1090.85	1525.28	1377.12	1028.54	1.10759	1.48296	0.240557	0.340498	0.0813	negligible	1.82237e-13	1.11241e-12	0.492	medium	9.38884e-10	6.87733e-09	0.425	medium
CE	CE(20:5)	408.635	320.409	517.431	315.927	262.21	364.686	1.20486	0.866298	0.0496485	0.0914906	0.136	small	0.239043	0.301635	-0.0788	negligible	0.00312721	0.00721475	-0.205	small
CE	CE(22:5)	40.6247	43.7523	27.76	40.2633	40.4142	27.6062	0.996265	1.45849	0.280977	0.379043	-0.0751	negligible	3.05178e-08	9.82605e-08	0.37	medium	2.32225e-10	1.83897e-09	0.441	medium
CE	CE(22:6)	245.795	240.035	327.16	226.753	232.088	290.452	0.977013	0.780692	0.435349	0.533165	0.0542	negligible	7.1468e-05	0.000164883	-0.265	small	2.52693e-05	8.22658e-05	-0.293	small
DG	DG(32:1)	2.67252	5.15602	5.66959	2.17655	4.2547	4.56614	0.511562	0.476671	2.26806e-11	3.90906e-10	-0.465	medium	1.66983e-11	8.58351e-11	-0.45	medium	0.495069	0.609475	-0.0474	negligible
DG	DG(32:2)	1.13958	1.90767	2.59878	1.03857	1.64395	1.9845	0.631749	0.523339	8.40711e-06	4.24704e-05	-0.309	medium	1.01678e-12	5.84152e-12	-0.476	medium	0.00327179	0.00748933	-0.204	small
DG	DG(34:1)	12.5399	22.3816	20.3759	11.1372	19.7342	16.7925	0.564361	0.663227	6.95743e-14	1.5681e-12	-0.521	large	5.93735e-10	2.38307e-09	-0.414	medium	0.0726019	0.114368	0.125	small
DG	DG(34:3)	2.26356	3.97655	4.72984	1.92906	3.54269	4.39569	0.544517	0.438851	7.96e-11	1.16614e-09	-0.452	medium	4.82208e-16	4.1555e-15	-0.543	large	0.02999	0.0539084	-0.151	small
DG	DG(36:2)	15.1731	20.5318	14.5742	13.3547	18.3549	13.054	0.727581	1.02303	3.83968e-06	2.12269e-05	-0.321	medium	0.601895	0.660506	0.0349	negligible	1.28343e-07	6.48351e-07	0.367	medium
DG	DG(36:3)	12.0839	18.1932	15.7556	11.27	16.199	14.9259	0.695724	0.755066	1.93653e-09	2.02644e-08	-0.417	medium	5.61346e-06	1.43021e-05	-0.303	medium	0.0231862	0.0424597	0.158	small
DG	DG(36:4)	4.47722	7.4058	6.98306	4.10828	6.56283	6.14126	0.625992	0.668963	2.57529e-11	4.19199e-10	-0.464	medium	4.16386e-10	1.71833e-09	-0.418	medium	0.26369	0.351187	0.0778	negligible
DG	DG(38:5)	1.28182	1.93201	1.3833	1.09722	1.58067	1.18804	0.694149	0.92355	1.7686e-06	1.05755e-05	-0.332	medium	0.33043	0.396787	-0.065	negligible	9.88653e-05	0.000304921	0.27	small
DG	DG(39:0)	3.55926	2.99766	4.97015	2.47266	2.65956	3.30948	0.929725	0.747144	0.335033	0.438235	0.067	negligible	0.0412164	0.0616063	-0.136	small	0.00334632	0.00760057	-0.204	small
DG	DG(41:1)	2.46728	2.68449	3.74605	2.26104	2.54722	3.41617	0.887652	0.661865	0.154133	0.241503	-0.0994	negligible	9.32292e-07	2.55291e-06	-0.328	medium	0.000172666	0.000516235	-0.261	small
DG	DG(42:0)	2.12074	2.21526	1.99347	2.11816	2.30346	1.97722	0.919556	1.07129	0.1659	0.255836	-0.0966	negligible	0.273558	0.338196	0.0728	negligible	0.0230452	0.0424597	0.158	small
DG	DG(42:1)	7.34665	8.14083	8.46954	7.08526	7.9539	8.17069	0.89079	0.867155	0.00463252	0.0114061	-0.197	small	2.30373e-05	5.62495e-05	-0.283	small	0.196235	0.275105	-0.0897	negligible
DG	DG(42:2)	1.00585	0.978798	1.17421	0.852436	0.837084	0.896	1.01834	0.95138	0.850395	0.880445	-0.0131	negligible	0.526718	0.6005	-0.0423	negligible	0.631452	0.737049	-0.0334	negligible
DG	DG(44:3)	3.20281	3.34882	2.23427	3.03773	2.99956	2.19335	1.01273	1.38498	0.608452	0.685679	-0.0356	negligible	5.48815e-11	2.51254e-10	0.438	medium	5.43754e-13	5.90074e-12	0.501	large
DG	DG-O(32:2)	1.92604	2.83029	2.6959	1.6182	2.44898	2.46873	0.660767	0.655479	8.40693e-06	4.24704e-05	-0.309	medium	6.38385e-05	0.00014845	-0.267	small	0.693929	0.783943	0.0274	negligible
DG	DG-O(34:1)	10.8461	14.2889	10.5173	9.40318	11.9206	9.94405	0.788819	0.945609	2.11909e-05	9.70145e-05	-0.295	small	0.949033	0.965509	-0.00427	negligible	4.54099e-06	1.79799e-05	0.318	medium
DG	DG-O(36:4)	4.7873	5.24973	4.9532	4.6582	5.13358	4.80186	0.907399	0.970083	0.00720615	0.0166252	-0.187	small	0.361005	0.429524	-0.061	negligible	0.069327	0.109799	0.126	small
TG	TG(44:1)	2.64101	7.34892	4.60118	0.340676	4.44957	0.333396	0.0765638	1.02184	2.05496e-06	1.2042e-05	-0.33	medium	0.125513	0.164175	-0.102	small	0.00377069	0.00849855	0.202	small
TG	TG(44:2)	1.33475	3.15748	2.58794	1.06032	1.9999	2.11967	0.530184	0.500228	3.14455e-09	3.07118e-08	-0.411	medium	2.53663e-09	9.40799e-09	-0.398	medium	0.405806	0.518638	0.0578	negligible
TG	TG(46:2)	3.71122	10.0102	6.95261	2.16369	6.43877	4.91919	0.336041	0.439847	6.16616e-08	4.88293e-07	-0.376	medium	0.000673411	0.00133317	-0.227	small	0.0148639	0.0280975	0.17	small
TG	TG(48:1)	34.441	51.3519	38.9232	27.4679	40.2483	31.606	0.682462	0.869074	4.33313e-05	0.000162326	-0.284	small	0.0623194	0.0869504	-0.124	small	0.0140245	0.0266829	0.171	small
TG	TG(48:2)	24.5615	38.2816	32.0961	17.0999	28.2026	26.4389	0.606325	0.64677	2.61377e-06	1.50164e-05	-0.327	medium	0.000284454	0.000612832	-0.243	small	0.165901	0.238279	0.0966	negligible
TG	TG(48:3)	6.99736	13.474	12.3988	0.381814	8.61916	10.0049	0.0442983	0.0381625	0.00388414	0.00989611	-0.201	small	0.0159334	0.0257928	-0.161	small	0.675113	0.772687	0.0291	negligible
TG	TG(49:1)	5.86791	7.92604	7.5378	4.53344	6.45716	6.56322	0.702079	0.690734	0.000304309	0.000891626	-0.251	small	0.000293681	0.000628092	-0.242	small	0.855875	0.905311	0.0126	negligible
TG	TG(49:2)	4.17219	5.70431	6.53475	3.40708	4.95809	5.85104	0.687175	0.582303	0.000125489	0.000391152	-0.267	small	1.2628e-08	4.25287e-08	-0.38	medium	0.0467459	0.0800968	-0.138	small
TG	TG(50:1)	82.3687	119.087	74.9745	67.4924	96.2845	62.4142	0.700969	1.08136	6.1375e-05	0.000213657	-0.279	small	0.45168	0.525168	0.0503	negligible	1.10833e-06	5.23777e-06	0.338	medium
TG	TG(50:2)	117.801	153.897	114.212	94.6286	130.722	98.1524	0.723894	0.964099	0.00319872	0.00829404	-0.205	small	0.926072	0.948738	0.0062	negligible	0.00146858	0.00358577	0.221	small
TG	TG(50:3)	56.0761	75.9933	68.1162	46.1927	65.7673	60.8359	0.702366	0.7593	6.32154e-05	0.000215373	-0.278	small	0.00460929	0.00808696	-0.189	small	0.18288	0.258859	0.0924	negligible
TG	TG(50:4)	19.2638	25.9943	24.3346	16.9714	21.8782	21.7864	0.775722	0.778993	4.59173e-06	2.49144e-05	-0.318	medium	3.31401e-05	7.95907e-05	-0.277	small	0.523455	0.627824	0.0443	negligible
TG	TG(51:1)	3.76416	4.32626	5.35888	2.70769	1.40342	3.53214	1.92934	0.766585	0.675113	0.740854	0.0291	negligible	0.113757	0.149466	-0.106	small	0.0852849	0.132214	-0.12	small
TG	TG(51:2)	11.341	14.1853	13.6873	9.75967	11.8934	12.3755	0.820594	0.78863	0.00446658	0.0111855	-0.197	small	0.00386695	0.00686676	-0.193	small	0.901779	0.936955	0.00855	negligible
TG	TG(51:3)	7.07264	9.31101	10.2735	6.32771	8.31226	8.9759	0.761251	0.704967	0.000106741	0.000339947	-0.269	small	1.26275e-08	4.25287e-08	-0.38	medium	0.073721	0.115509	-0.124	small
TG	TG(51:4)	2.85022	3.83285	4.33679	2.61875	3.51931	3.92428	0.744109	0.66732	3.26484e-05	0.000134222	-0.288	small	2.19936e-10	9.6181e-10	-0.424	medium	0.0483109	0.0822705	-0.137	small
TG	TG(51:5)	0.801257	1.0378	1.40763	0.528705	0.890902	1.3962	0.59345	0.378674	0.249059	0.347496	-0.0799	negligible	3.90403e-08	1.21689e-07	-0.367	medium	0.00056837	0.00151393	-0.24	small
TG	TG(52:2)	292.175	358.962	215.281	244.528	327.809	189.104	0.745946	1.29309	0.00923212	0.0206489	-0.181	small	6.21904e-05	0.000145774	0.267	small	7.1057e-10	5.33839e-09	0.428	medium
TG	TG(52:3)	264.892	347.646	258.822	231.479	308.905	235.129	0.749353	0.984478	0.000100781	0.000324492	-0.27	small	0.686105	0.733682	0.027	negligible	1.14913e-05	4.00826e-05	0.305	medium
TG	TG(52:4)	110.348	152.469	130.91	102.102	130.696	114.49	0.781216	0.8918	1.64853e-05	7.79064e-05	-0.3	medium	0.0157541	0.0256442	-0.161	small	0.0216778	0.040456	0.16	small
TG	TG(52:5)	29.4645	40.7298	34.986	25.6472	35.955	29.9623	0.713314	0.855981	3.26486e-05	0.000134222	-0.288	small	0.0116079	0.0192153	-0.168	small	0.0393241	0.0689937	0.143	small
TG	TG(52:6)	5.71004	7.16328	7.84631	4.37959	5.68018	5.61413	0.771029	0.780102	0.00157844	0.00432226	-0.22	small	0.000638724	0.0012731	-0.228	small	0.718154	0.803126	-0.0251	negligible
TG	TG(52:7)	2.62897	2.75054	3.43571	2.49855	2.6564	3.27873	0.940576	0.762048	0.212843	0.311216	-0.0869	negligible	4.40141e-09	1.55375e-08	-0.392	medium	2.44065e-06	1.07964e-05	-0.327	medium
TG	TG(53:3)	6.88774	9.31476	9.99782	6.02391	8.32722	8.6157	0.7234	0.699179	0.000148697	0.000458613	-0.263	small	8.05421e-09	2.77633e-08	-0.386	medium	0.100664	0.152822	-0.114	small
TG	TG(53:4)	3.83108	5.06807	6.04965	3.38892	4.56262	5.50802	0.742756	0.61527	2.68805e-05	0.000117552	-0.292	small	3.63696e-13	2.17476e-12	-0.486	medium	0.00164268	0.00397774	-0.219	small
TG	TG(53:5)	1.87781	2.48998	2.71274	1.72336	2.28803	2.36963	0.753205	0.727271	6.19824e-05	0.000213657	-0.279	small	4.13866e-08	1.27645e-07	-0.366	medium	0.128372	0.188064	-0.106	small
TG	TG(53:6)	0.551497	0.728288	1.38872	0.0442979	0.0464609	1.36605	0.953446	0.0324278	0.335033	0.438235	-0.067	negligible	4.5067e-10	1.83397e-09	-0.417	medium	8.74649e-07	4.20118e-06	-0.342	medium
TG	TG(54:2)	0.903153	1.23411	1.40442	0.582147	0.5948	0.641668	0.978727	0.907241	0.749716	0.798789	0.0222	negligible	0.0470697	0.0682744	-0.133	small	0.0485761	0.0822705	-0.137	small
TG	TG(54:3)	77.8084	117.459	70.9031	71.1889	101.322	63.3957	0.702599	1.12293	2.85878e-05	0.000121395	-0.291	small	0.150079	0.193714	0.0962	negligible	9.94327e-08	5.11119e-07	0.37	medium
TG	TG(54:4)	72.8708	113.08	79.9025	68.1092	95.3906	74.0408	0.714003	0.919887	9.08878e-08	6.65753e-07	-0.371	medium	0.204759	0.261984	-0.0849	negligible	2.25529e-05	7.42473e-05	0.295	small
TG	TG(54:5)	52.9086	80.5123	58.2153	48.3136	70.5304	49.6641	0.685004	0.972807	8.63311e-08	6.4859e-07	-0.372	medium	0.270858	0.336277	-0.0735	negligible	1.27864e-05	4.3563e-05	0.303	medium
TG	TG(54:6)	29.3887	41.6395	34.8127	24.7229	35.7857	29.2649	0.690861	0.844799	2.37517e-05	0.00010654	-0.294	small	0.0176288	0.0282254	-0.158	small	0.0267967	0.0487553	0.154	small
TG	TG(54:7)	7.80729	11.6485	9.30084	5.48639	8.95254	7.061	0.61283	0.776998	6.07736e-05	0.000213657	-0.279	small	0.0940684	0.126431	-0.112	small	0.00604411	0.0127405	0.191	small
TG	TG(55:6)	1.47742	1.693	2.01943	1.54359	1.68521	1.79393	0.915965	0.860452	0.164482	0.255836	-0.0966	negligible	0.000488861	0.000994696	-0.233	small	0.0675608	0.107583	-0.127	small
TG	TG(55:7)	0.78962	1.00756	1.68878	0.0989556	0.68438	1.56016	0.144592	0.0634265	0.633109	0.705327	-0.0332	negligible	6.20958e-08	1.89521e-07	-0.361	medium	1.26509e-05	4.3563e-05	-0.304	medium
TG	TG(56:6)	12.0375	13.4272	10.244	11.4111	13.6424	10.2274	0.836441	1.11573	0.0310639	0.0598799	-0.15	small	0.0113383	0.0189836	0.169	small	7.5403e-06	2.83245e-05	0.311	medium
TG	TG(56:7)	20.8032	23.2525	24.0401	17.8696	21.7782	20.0228	0.820524	0.892462	0.126049	0.207486	-0.106	small	0.0570149	0.0807023	-0.127	small	0.86136	0.907837	-0.0122	negligible
TG	TG(56:8)	8.11925	9.94453	16.2353	3.96676	6.8561	12.4857	0.578573	0.317703	0.024193	0.0488865	-0.156	small	3.27489e-08	1.03177e-07	-0.369	medium	4.28984e-05	0.000138123	-0.284	small
TG	TG(56:9)	2.33508	2.34586	2.71735	1.59173	1.73725	2.26403	0.916239	0.703053	0.436722	0.533165	-0.0541	negligible	0.060602	0.0853559	-0.126	small	0.211991	0.291611	-0.0869	negligible
LPC	LPC(14:0)	0.816389	1.1859	1.08094	0.736317	1.11687	1.02771	0.659267	0.716461	3.57744e-05	0.000141647	-0.287	small	0.0523421	0.0744478	-0.13	small	0.152792	0.221624	0.0994	negligible
LPC	LPC(15:0)	0.448538	0.592872	0.866149	0.434432	0.567689	0.829521	0.765265	0.523715	1.18945e-06	7.26059e-06	-0.338	medium	1.59072e-29	4.66081e-28	-0.755	large	1.79922e-13	2.10868e-12	-0.512	large
LPC	LPC(16:0)	58.9795	85.335	99.8038	57.3762	83.0266	96.5533	0.691057	0.594244	5.95944e-19	2.91019e-17	-0.618	large	3.7766e-30	1.22949e-28	-0.762	large	7.87638e-06	2.92124e-05	-0.311	medium
LPC	LPC(16:1)	1.77421	2.31567	3.52092	1.62021	2.19502	3.36315	0.738132	0.481754	1.44988e-10	1.93098e-09	-0.446	medium	5.23017e-29	1.27703e-27	-0.748	large	8.6893e-18	1.95843e-16	-0.597	large
LPC	LPC(17:0)	1.06803	1.49615	2.46671	1.03324	1.47265	2.465	0.701623	0.419166	1.61313e-10	2.05499e-09	-0.444	medium	1.47668e-34	1.44222e-32	-0.822	large	6.6249e-22	3.88219e-20	-0.669	large
LPC	LPC(17:1)	0.229073	0.270837	0.500751	0.228223	0.263697	0.454916	0.865473	0.501681	6.97318e-05	0.000234844	-0.277	small	1.23356e-33	6.0239e-32	-0.808	large	2.10958e-26	2.39263e-24	-0.737	large
LPC	LPC(18:0)	37.8603	56.7688	69.6789	37.5898	53.0948	68.6276	0.707975	0.547736	6.17246e-17	2.58361e-15	-0.581	large	4.54936e-29	1.21178e-27	-0.748	large	3.27972e-06	1.3728e-05	-0.323	medium
LPC	LPC(18:1)	27.2512	34.3087	39.8095	26.2029	33.9852	39.2205	0.77101	0.668093	4.86618e-09	4.59933e-08	-0.407	medium	1.09249e-18	1.23115e-17	-0.59	large	0.00021951	0.000649661	-0.257	small
LPC	LPC(18:2)	21.4244	30.5054	34.7059	20.58	29.7243	31.7925	0.692361	0.647321	1.7766e-09	2.0021e-08	-0.418	medium	5.14276e-14	3.42461e-13	-0.503	large	0.0499196	0.083558	-0.136	small
LPC	LPC(20:0)	0.0971042	0.0972549	0.164622	0.0684974	0.0607498	0.142394	1.12753	0.48104	0.56992	0.654849	0.0395	negligible	3.19417e-07	9.08633e-07	-0.341	medium	4.45685e-07	2.17643e-06	-0.351	medium
LPC	LPC(20:1)	0.365178	0.470201	0.756232	0.36547	0.454564	0.716419	0.804	0.510135	1.05721e-08	9.11069e-08	-0.398	medium	1.17322e-33	6.0239e-32	-0.808	large	2.33476e-21	1.14014e-19	-0.66	large
LPC	LPC(20:3)	10.1719	13.1674	15.9042	9.63485	13.0103	14.3569	0.740555	0.671094	2.80066e-05	0.000120675	-0.291	small	1.60021e-11	8.37255e-11	-0.45	medium	0.00635107	0.0132919	-0.19	small
LPC	LPC(20:4)	14.576	18.7592	19.0233	13.6761	17.9683	18.8325	0.761125	0.726199	7.88793e-08	6.08201e-07	-0.373	medium	3.27489e-08	1.03177e-07	-0.369	medium	0.699095	0.784808	-0.0269	negligible
LPC	LPC(22:5)	0.24774	0.276082	0.333445	0.243036	0.290444	0.342725	0.836776	0.709128	0.015547	0.0339945	-0.168	small	1.11137e-07	3.25632e-07	-0.355	medium	0.00388412	0.00868737	-0.201	small
LPC	LPC(22:6)	2.41181	2.88586	3.61874	2.33836	2.79057	3.36832	0.837951	0.694221	3.62997e-06	2.04535e-05	-0.322	medium	2.22237e-15	1.86044e-14	-0.53	large	4.49072e-06	1.79799e-05	-0.319	medium
LPC	LPC-O(16:1)	1.01609	1.35665	1.51924	0.965959	1.29307	1.4729	0.747028	0.655823	2.29937e-09	2.32315e-08	-0.416	medium	6.69639e-20	8.91838e-19	-0.61	large	0.00604396	0.0127405	-0.191	small
LPC	LPC-O(18:0)	0.427914	0.525633	0.616035	0.444452	0.51027	0.591427	0.871013	0.75149	3.8013e-05	0.00014655	-0.286	small	1.45831e-14	1.01735e-13	-0.514	large	0.000155827	0.000475598	-0.263	small
LPC	LPC-O(18:1)	0.918875	1.3646	1.43629	0.885083	1.29155	1.32687	0.685289	0.667046	1.71592e-14	4.57058e-13	-0.533	large	1.97163e-24	3.39817e-23	-0.682	large	0.203587	0.284053	-0.0883	negligible
LPC	LPC-O(18:2)	0.285113	0.338336	0.423334	0.284429	0.336982	0.40981	0.844046	0.694051	0.000290926	0.000861022	-0.252	small	3.94063e-19	4.81085e-18	-0.597	large	3.15387e-08	1.74355e-07	-0.384	medium
PC	PC(24:0)	0.231619	0.231545	0.282357	0.130726	0.134238	0.241406	0.973838	0.541521	0.608452	0.685679	-0.0356	negligible	0.0137377	0.0226132	-0.164	small	0.0307025	0.0548527	-0.15	small
PC	PC(25:0)	0.0977933	0.0962262	0.35869	0.0939739	0.0912237	0.318938	1.03015	0.294646	0.835821	0.871514	0.0144	negligible	4.39338e-34	3.21815e-32	-0.815	large	1.15941e-31	3.39708e-29	-0.813	large
PC	PC(29:0)	0.194328	0.1662	0.234354	0.119034	0.105615	0.186318	1.12706	0.638873	0.0819579	0.142938	0.121	small	0.0324958	0.04959	-0.143	small	0.00017107	0.000516235	-0.261	small
PC	PC(30:0)	3.63999	3.45089	3.68705	3.19313	2.96595	3.18256	1.07659	1.00332	0.424465	0.528663	0.0555	negligible	0.599026	0.659829	-0.0351	negligible	0.209444	0.290635	-0.0876	negligible
PC	PC(31:0)	0.357579	0.242276	0.439676	0.203723	0.0392686	0.308321	5.18795	0.660751	0.000321129	0.000931591	0.25	small	0.00657433	0.0113311	-0.182	small	5.59629e-09	3.5646e-08	-0.405	medium
PC	PC(31:3)	0.12542	0.12117	0.181868	0.116641	0.0595763	0.176546	1.95784	0.660685	0.633109	0.705327	0.0332	negligible	0.000338763	0.000719258	-0.239	small	0.00024944	0.000716538	-0.254	small
PC	PC(32:0)	19.2465	18.9928	17.7466	18.7059	17.8744	17.6796	1.04652	1.05805	0.51741	0.613769	0.045	negligible	0.0233192	0.036734	0.152	small	0.131916	0.192296	0.105	small
PC	PC(32:1)	26.5891	24.4775	22.7669	22.1336	20.6442	19.8678	1.07214	1.11404	0.135539	0.22186	0.104	small	0.0506134	0.0726947	0.13	small	0.680225	0.775509	0.0286	negligible
PC	PC(32:2)	6.00898	6.32173	6.80564	5.59578	6.07563	6.30653	0.921021	0.887299	0.217151	0.313136	-0.0855	negligible	0.00641229	0.0111172	-0.182	small	0.121503	0.1798	-0.108	small
PC	PC(32:3)	1.62036	1.43666	1.5857	1.42324	1.31009	1.45305	1.08637	0.979479	0.0562072	0.100419	0.133	small	0.978615	0.990129	0.00179	negligible	0.063805	0.102719	-0.129	small
PC	PC(32:4)	0.46028	0.438598	0.434496	0.468936	0.533215	0.462629	0.87945	1.01363	0.739146	0.796212	0.0231	negligible	0.741465	0.781472	0.022	negligible	0.994426	0.999696	0.000486	negligible
PC	PC(32:5)	1.08413	1.00712	0.934892	1.07476	1.00297	0.937693	1.07158	1.14618	0.0521341	0.0948776	0.135	small	0.000151967	0.000339895	0.253	small	0.0815487	0.127095	0.121	small
PC	PC(32:6)	0.15658	0.250501	0.301965	0.0184396	0.134	0.1095	0.137609	0.168398	0.00209771	0.00548786	-0.214	small	0.000578646	0.00116926	-0.23	small	0.825832	0.892874	-0.0153	negligible
PC	PC(33:0)	1.21954	1.08883	1.86506	1.13333	1.01871	1.79698	1.11252	0.630685	0.0344864	0.0659926	0.147	small	4.33619e-11	2.01667e-10	-0.44	medium	2.28922e-16	4.19213e-15	-0.571	large
PC	PC(33:1)	6.3358	4.8774	7.36944	6.55232	5.94226	7.72836	1.10266	0.847828	0.00516426	0.0125052	0.195	small	0.0277986	0.0435561	-0.147	small	3.54923e-06	1.46468e-05	-0.323	medium
PC	PC(33:2)	3.22237	3.15922	4.0381	3.15815	2.85703	3.92286	1.1054	0.805063	0.467524	0.563722	0.0505	negligible	9.82524e-07	2.66555e-06	-0.327	medium	7.49043e-08	3.99035e-07	-0.374	medium
PC	PC(33:3)	0.67031	0.635992	0.741721	0.641353	0.650425	0.703598	0.986053	0.911534	0.666625	0.73429	0.03	negligible	0.0523421	0.0744478	-0.13	small	0.0116745	0.0226531	-0.175	small
PC	PC(33:4)	1.5733	1.53701	1.53376	1.53888	1.54263	1.49706	0.997573	1.02794	0.678519	0.741813	0.0288	negligible	0.512013	0.586015	0.0438	negligible	1	1	0	negligible
PC	PC(34:1)	259.63	255.065	216.767	243.951	241.856	211.054	1.00866	1.15587	0.534121	0.625285	0.0432	negligible	1.28864e-06	3.46395e-06	0.323	medium	1.92928e-05	6.42363e-05	0.297	small
PC	PC(34:3)	25.1783	23.8286	25.5918	23.5217	22.7112	24.8178	1.03569	0.947777	0.331542	0.437576	0.0675	negligible	0.298697	0.364659	-0.0695	negligible	0.0338944	0.0598257	-0.147	small
PC	PC(34:4)	12.9111	11.2972	10.6989	10.912	9.77156	9.68683	1.11671	1.12647	0.015251	0.033598	0.169	small	0.00497889	0.00868341	0.188	small	0.790658	0.85801	0.0184	negligible
PC	PC(34:5)	3.79875	3.71002	3.88295	3.67381	3.73468	3.66245	0.983702	1.0031	0.747951	0.798789	0.0223	negligible	0.619236	0.673564	-0.0332	negligible	0.43535	0.545117	-0.0542	negligible
PC	PC(35:1)	4.15752	4.11811	5.27163	4.04586	3.75694	5.12093	1.0769	0.790063	0.21802	0.313136	0.0855	negligible	1.89943e-08	6.32424e-08	-0.376	medium	3.18933e-09	2.12381e-08	-0.411	medium
PC	PC(35:2)	8.52609	9.09609	12.5554	8.49063	8.87259	12.493	0.95695	0.679632	0.182116	0.273641	-0.0924	negligible	9.25351e-19	1.08451e-17	-0.591	large	1.20273e-13	1.53218e-12	-0.516	large
PC	PC(35:3)	2.95966	3.07409	3.90007	3.03035	2.98701	3.75834	1.01451	0.8063	0.960999	0.969472	0.0034	negligible	3.26193e-09	1.16554e-08	-0.396	medium	1.08659e-08	6.6327e-08	-0.398	medium
PC	PC(35:4)	3.03336	2.51169	2.8889	2.73432	2.218	2.60978	1.23279	1.04772	0.00023834	0.000712589	0.255	small	0.533473	0.603504	0.0416	negligible	0.00203314	0.00480411	-0.215	small
PC	PC(35:5)	2.23776	2.00655	2.50578	2.1985	1.87376	2.43964	1.17331	0.90116	0.00700759	0.0162954	0.188	small	0.00175998	0.00337044	-0.209	small	2.32044e-08	1.35978e-07	-0.389	medium
PC	PC(36:1)	27.0819	23.5577	18.6959	14.2193	2.86741	2.65611	4.95892	5.35343	4.55582e-05	0.000164797	0.284	small	0.00399566	0.00705258	0.192	small	0.515906	0.627221	-0.0452	negligible
PC	PC(36:2)	210.166	242.503	231.063	205.608	229.404	226.687	0.896271	0.907014	1.5474e-05	7.4326e-05	-0.3	medium	0.00288679	0.00522116	-0.199	small	0.230444	0.314048	0.0834	negligible
PC	PC(36:3)	124.394	140.346	128.993	117.372	134.388	129.14	0.873379	0.908875	0.000363808	0.00104506	-0.248	small	0.220647	0.281085	-0.0815	negligible	0.0269569	0.0487553	0.154	small
PC	PC(36:4)	292.66	287.256	223.032	279.937	274.959	220.946	1.0181	1.26699	0.50543	0.601996	0.0463	negligible	1.20146e-14	8.80072e-14	0.516	large	3.13606e-13	3.5341e-12	0.507	large
PC	PC(36:5)	258.436	270.874	270.215	254.478	265.455	267.323	0.958649	0.951948	0.122627	0.202993	-0.107	small	0.138193	0.179162	-0.0989	negligible	0.942454	0.965521	0.00502	negligible
PC	PC(36:6)	10.1154	9.10897	10.8217	9.3692	8.53458	10.3048	1.09779	0.909206	0.106089	0.180722	0.113	small	0.0186374	0.029678	-0.157	small	8.07148e-05	0.000254295	-0.274	small
PC	PC(37:1)	0.463968	0.505583	0.596707	0.449215	0.49349	0.581941	0.910281	0.771924	0.10863	0.183981	-0.111	small	8.48017e-07	2.34405e-06	-0.329	medium	0.00101762	0.00259272	-0.229	small
PC	PC(37:2)	1.27451	1.36757	1.81868	1.24823	1.307	1.77449	0.955032	0.703429	0.265684	0.365472	-0.0772	negligible	2.91435e-17	3.04966e-16	-0.565	large	1.748e-12	1.82916e-11	-0.49	medium
PC	PC(37:3)	1.80887	1.96645	2.60362	1.7576	1.86871	2.56049	0.940541	0.68643	0.145571	0.231576	-0.101	small	1.04766e-12	5.90318e-12	-0.476	medium	4.11171e-09	2.67718e-08	-0.409	medium
PC	PC(37:4)	6.37163	5.55067	6.18418	6.19241	5.01377	6.19796	1.23508	0.999105	0.000614071	0.00171355	0.238	small	0.69675	0.739665	0.0261	negligible	0.00135482	0.00333582	-0.222	small
PC	PC(37:5)	10.3116	8.09555	12.2088	9.85646	6.70584	12.7802	1.46983	0.771229	9.88637e-05	0.000321856	0.27	small	0.0036689	0.0065548	-0.194	small	2.38353e-08	1.36936e-07	-0.388	medium
PC	PC(37:6)	4.91839	4.436	4.48323	4.90357	4.43214	4.38861	1.10637	1.11734	0.00463252	0.0114061	0.197	small	0.0167623	0.0269854	0.16	small	0.639755	0.737985	-0.0325	negligible
PC	PC(37:7)	0.654574	0.579662	0.672807	0.597841	0.477008	0.642437	1.25331	0.930584	0.0382261	0.0722597	0.144	small	0.562311	0.626453	-0.0387	negligible	0.0100127	0.0202277	-0.179	small
PC	PC(38:1)	1.62115	1.73205	1.98324	1.68137	1.79722	1.92319	0.935538	0.874259	0.137377	0.22362	-0.104	small	0.000223441	0.000488569	-0.247	small	0.0323582	0.0574603	-0.149	small
PC	PC(38:2)	6.01403	7.06567	6.67905	6.06951	7.41539	7.16063	0.818502	0.847622	0.031064	0.0598799	-0.15	small	0.0608852	0.0853559	-0.125	small	0.361349	0.466411	0.0635	negligible
PC	PC(38:3)	34.0277	30.9874	31.2092	33.1055	30.2263	32.5098	1.09526	1.01832	0.32235	0.429312	0.0688	negligible	0.620691	0.673564	0.0331	negligible	0.509906	0.625115	-0.0458	negligible
PC	PC(38:4)	119.117	123.814	90.5035	112.535	114.507	88.309	0.982779	1.27433	0.56047	0.649081	-0.0405	negligible	2.01608e-12	1.11455e-11	0.47	medium	4.3779e-14	5.93642e-13	0.525	large
PC	PC(38:5)	179.34	171.06	186.051	175.375	171.943	188.556	1.01996	0.930096	0.264684	0.365472	0.0778	negligible	0.0738198	0.101546	-0.12	small	0.0051269	0.0111273	-0.195	small
PC	PC(38:6)	152.25	156.958	172.083	150.849	148.917	170.003	1.01297	0.887331	0.419082	0.527	-0.0562	negligible	9.81742e-05	0.000224727	-0.261	small	0.00170925	0.00410501	-0.218	small
PC	PC(38:7)	102.355	91.4593	76.2776	99.0406	87.4601	76.3588	1.13241	1.29704	0.0187975	0.0393404	0.163	small	2.68046e-08	8.72639e-08	0.371	medium	0.00839056	0.0173129	0.183	small
PC	PC(39:3)	1.38216	1.16971	1.1196	1.4171	1.12055	1.09734	1.26464	1.29139	0.00366023	0.00940744	0.202	small	0.000144576	0.000325853	0.254	small	0.457595	0.568116	0.0516	negligible
PC	PC(39:4)	2.28822	2.17688	2.52164	2.26902	2.19864	2.57509	1.03201	0.88114	0.142377	0.229211	0.102	small	0.00092791	0.00182468	-0.221	small	3.83959e-06	1.5625e-05	-0.321	medium
PC	PC(39:5)	1.06697	0.952871	1.81918	0.991266	0.831837	1.723	1.19166	0.575314	0.0714966	0.126196	0.125	small	2.87278e-10	1.20248e-09	-0.422	medium	1.64824e-11	1.60978e-10	-0.468	medium
PC	PC(39:6)	3.20408	2.66413	4.9783	2.94041	2.41145	4.9661	1.21935	0.592096	0.0277717	0.0549804	0.153	small	1.12092e-11	5.97145e-11	-0.454	medium	3.76879e-18	1.00387e-16	-0.604	large
PC	PC(39:7)	2.78815	1.87648	2.96778	2.71265	0.536775	2.68721	5.05361	1.00947	8.39117e-05	0.000279388	0.273	small	0.666504	0.717962	-0.0288	negligible	1.17555e-06	5.46725e-06	-0.338	medium
PC	PC(40:1)	1.0553	1.48351	1.11273	0.696674	1.09031	0.792646	0.638968	0.878921	1.16153e-05	5.67216e-05	-0.304	medium	0.0340313	0.0513963	-0.142	small	0.0110706	0.0219149	0.177	small
PC	PC(40:2)	0.739539	1.00823	0.982221	0.55678	0.752101	0.751302	0.7403	0.741087	8.80706e-05	0.00028994	-0.272	small	4.79784e-06	1.23313e-05	-0.305	medium	0.64643	0.742761	-0.0319	negligible
PC	PC(40:3)	0.770114	0.845764	1.11399	0.743608	0.795635	1.0407	0.934609	0.714526	0.138615	0.224388	-0.103	small	1.77877e-09	6.6818e-09	-0.402	medium	2.4688e-06	1.07964e-05	-0.327	medium
PC	PC(40:4)	4.73496	4.86201	4.66329	4.47867	4.63133	4.64361	0.967038	0.96448	0.56992	0.654849	-0.0395	negligible	0.562311	0.626453	-0.0387	negligible	0.914699	0.943685	0.00744	negligible
PC	PC(40:5)	3.61117	5.17788	1.91778	2.44661	0.755755	0.792591	3.23731	3.08685	0.0041815	0.0105619	0.199	small	0.000456021	0.000947619	0.235	small	0.996284	0.999696	-0.000324	negligible
PC	PC(40:6)	49.4751	48.7254	56.4862	48.8433	46.1303	54.3171	1.05881	0.899226	0.763884	0.8051	0.0209	negligible	0.00271669	0.00494404	-0.2	small	0.000347994	0.000980405	-0.249	small
PC	PC(40:7)	60.5318	51.7405	47.9077	58.5864	48.8495	49.6702	1.19933	1.17951	0.00955049	0.0211992	0.18	small	0.000633902	0.00127214	0.229	small	0.623195	0.733318	0.0341	negligible
PC	PC(40:8)	13.7453	12.4451	11.5807	10.3861	7.5981	8.04693	1.36693	1.29069	0.146217	0.231576	0.101	small	0.0667895	0.0927456	0.122	small	0.779916	0.85267	0.0194	negligible
PC	PC(40:9)	52.5145	40.5676	61.9364	47.8808	41.7187	56.9293	1.14771	0.841057	0.00209775	0.00548786	0.214	small	0.0433081	0.0640872	-0.135	small	5.66901e-06	2.18555e-05	-0.316	medium
PC	PC(41:4)	0.552672	0.339358	0.495974	0.195949	0.166779	0.176152	1.1749	1.11238	0.000202091	0.000610441	0.259	small	0.0452666	0.0663155	0.134	small	0.118178	0.175767	-0.108	small
PC	PC(41:5)	0.392227	0.447164	0.379984	0.237877	0.284906	0.235389	0.834931	1.01057	0.245254	0.345153	-0.0806	negligible	0.847928	0.881003	-0.0128	negligible	0.331542	0.431741	0.0675	negligible
PC	PC(41:8)	1.01469	0.963285	1.13979	0.93329	0.923846	1.0196	1.01022	0.915352	0.464675	0.562603	0.0508	negligible	0.0463865	0.0676181	-0.133	small	0.0137541	0.0263395	-0.171	small
PC	PC(42:2)	1.63538	1.59111	1.3588	0.250639	1.01055	0.722994	0.248022	0.346668	0.00686212	0.0160848	-0.188	small	0.401346	0.468503	-0.0561	negligible	0.0615065	0.0995658	0.13	small
PC	PC(42:4)	0.707046	0.856117	0.844443	0.689409	0.810796	0.807596	0.850286	0.853656	0.00783214	0.0177893	-0.185	small	0.00202348	0.00380052	-0.206	small	0.972137	0.989014	-0.00243	negligible
PC	PC(42:5)	0.302091	0.361794	0.653791	0.0379506	0.0385973	0.693116	0.983244	0.0547536	0.916546	0.932458	-0.0073	negligible	2.27262e-07	6.5282e-07	-0.346	medium	1.10097e-05	3.93396e-05	-0.306	medium
PC	PC(42:6)	0.53559	0.460653	1.2698	0.133573	0.00954412	1.16112	13.9953	0.115038	0.502458	0.600899	0.0466	negligible	2.87281e-10	1.20248e-09	-0.422	medium	3.42353e-11	3.13467e-10	-0.461	medium
PC	PC(42:7)	2.20528	1.97197	2.13675	2.09295	1.9742	2.19155	1.06015	0.95501	0.122627	0.202993	0.107	small	0.940827	0.960496	0.00496	negligible	0.0895975	0.138169	-0.118	small
PC	PC(42:10)	2.24175	2.64637	4.05374	1.91366	1.83515	3.90477	1.04278	0.490083	0.282018	0.379043	-0.0751	negligible	1.32578e-09	5.11123e-09	-0.405	medium	9.47012e-06	3.42561e-05	-0.308	medium
PC	PC(43:6)	0.858303	0.805612	0.907891	0.959543	0.941921	0.95277	1.01871	1.00711	0.639754	0.71003	0.0325	negligible	0.817361	0.85531	0.0154	negligible	0.907313	0.939374	-0.00806	negligible
PC	PC(44:1)	0.766824	0.88714	0.496681	0.480543	0.66661	0.265739	0.720876	1.80833	0.207758	0.305895	-0.0876	negligible	0.000428565	0.000896926	0.235	small	6.83409e-06	2.6005e-05	0.313	medium
PC	PC(46:2)	0.485508	0.892293	0.474338	0.322979	0.709501	0.112737	0.45522	2.8649	3.65064e-05	0.000142618	-0.287	small	0.373053	0.438974	0.0595	negligible	3.03003e-06	1.28667e-05	0.325	medium
PC	PC-O(30:0)	0.429368	0.367738	0.433926	0.416616	0.344323	0.441902	1.20996	0.942779	0.00735821	0.0168434	0.186	small	0.985194	0.990129	0.00124	negligible	0.000854501	0.00221565	-0.231	small
PC	PC-O(32:1)	2.54312	2.30247	2.18691	2.47957	2.25007	2.16968	1.102	1.14283	0.00173664	0.00471145	0.218	small	1.43536e-05	3.53411e-05	0.29	small	0.210289	0.290635	0.0869	negligible
PC	PC-O(32:3)	0.257468	0.202664	0.243716	0.260648	0.200136	0.240736	1.30235	1.08271	4.3767e-05	0.000162326	0.284	small	0.321292	0.389002	0.0663	negligible	0.000332809	0.000946728	-0.25	small
PC	PC-O(34:0)	0.475471	0.378765	0.530334	0.412637	0.174712	0.462444	2.36182	0.892295	0.197042	0.291582	0.0897	negligible	0.239867	0.301635	-0.0788	negligible	0.00562869	0.012038	-0.193	small
PC	PC-O(34:1)	6.39725	6.10745	5.03653	6.15991	5.85913	4.89102	1.05134	1.25943	0.116001	0.195335	0.109	small	3.66938e-11	1.73408e-10	0.442	medium	2.82915e-07	1.40499e-06	0.357	medium
PC	PC-O(34:2)	10.692	11.1342	9.4265	10.04	10.1762	9.21897	0.986615	1.08906	0.546443	0.635348	-0.0419	negligible	0.00796021	0.0135601	0.177	small	0.000913553	0.00234799	0.231	small
PC	PC-O(34:3)	10.1108	10.7827	10.3683	9.70175	10.4588	10.6582	0.927612	0.910257	0.101634	0.174145	-0.114	small	0.478128	0.551541	-0.0474	negligible	0.634766	0.737049	0.033	negligible
PC	PC-O(34:4)	2.00093	1.79161	1.74274	1.96462	1.7683	1.69913	1.11102	1.15625	0.00575044	0.0135877	0.192	small	0.000101572	0.000230701	0.26	small	0.366269	0.470688	0.0628	negligible
PC	PC-O(35:3)	1.24111	1.35198	1.42044	1.22245	1.30047	1.3592	0.940009	0.899393	0.182115	0.273641	-0.0924	negligible	0.00347999	0.00625545	-0.195	small	0.158211	0.228353	-0.098	negligible
PC	PC-O(36:2)	2.99385	3.06434	2.97999	2.84154	3.02199	2.96234	0.940287	0.959221	0.425817	0.528663	-0.0553	negligible	0.898274	0.923489	0.00855	negligible	0.470383	0.581528	0.0502	negligible
PC	PC-O(36:3)	8.0103	8.44978	7.45661	7.55912	7.8962	7.43723	0.957311	1.01639	0.324632	0.430395	-0.0685	negligible	0.110497	0.146497	0.107	small	0.0111444	0.0219149	0.177	small
PC	PC-O(36:4)	23.6491	23.696	16.2441	23.4973	22.3869	16.4844	1.0496	1.42542	0.523456	0.61773	0.0443	negligible	2.19436e-21	3.38393e-20	0.635	large	2.16498e-19	7.0482e-18	0.626	large
PC	PC-O(36:5)	19.2192	19.2498	15.0417	19.1144	19.0019	14.8128	1.00592	1.2904	0.576259	0.659547	0.0389	negligible	2.62263e-11	1.28073e-10	0.446	medium	3.14425e-09	2.12381e-08	0.411	medium
PC	PC-O(36:6)	6.10327	6.116	6.55014	5.82044	5.87109	6.45317	0.991372	0.90195	0.986995	0.986995	-0.00113	negligible	0.136556	0.177826	-0.0996	negligible	0.124901	0.183899	-0.106	small
PC	PC-O(37:6)	0.780074	0.820821	0.894578	0.777302	0.793547	0.849589	0.979529	0.914916	0.360125	0.464831	-0.0636	negligible	0.00182271	0.00346788	-0.208	small	0.0501918	0.083558	-0.136	small
PC	PC-O(38:3)	0.910039	0.536127	0.972651	0.894597	0.192205	1.01591	4.65439	0.88059	3.29828e-05	0.000134222	0.288	small	0.286407	0.351118	-0.0715	negligible	2.70469e-06	1.1654e-05	-0.326	medium
PC	PC-O(38:4)	10.5134	10.8532	8.41322	10.3468	10.005	8.22871	1.03417	1.25741	0.863191	0.890545	-0.012	negligible	1.37258e-10	6.18718e-10	0.429	medium	2.26792e-11	2.14355e-10	0.465	medium
PC	PC-O(38:5)	21.1064	21.5527	15.8923	20.8039	20.829	15.6081	0.998797	1.33289	0.767438	0.805947	-0.0206	negligible	1.75755e-16	1.66117e-15	0.551	large	3.6147e-17	7.56505e-16	0.585	large
PC	PC-O(38:6)	12.7703	12.6606	12.5372	12.3274	12.2082	12.5927	1.00977	0.978932	0.661552	0.731452	0.0304	negligible	0.828593	0.863978	0.0145	negligible	0.898093	0.936445	-0.0089	negligible
PC	PC-O(40:4)	0.970025	0.827062	0.783713	1.00229	0.783095	0.757974	1.27991	1.32233	0.0176533	0.0380324	0.165	small	0.00259076	0.00474433	0.201	small	0.524972	0.627824	0.0442	negligible
PC	PC-O(40:5)	2.29082	2.32118	2.21222	2.25147	2.13203	2.16022	1.05602	1.04224	0.885207	0.906873	0.01	negligible	0.252461	0.31477	0.0762	negligible	0.415072	0.526477	0.0566	negligible
PC	PC-O(40:6)	3.82968	3.77005	4.59331	3.80538	3.71658	4.61699	1.02389	0.824211	0.365036	0.469103	0.063	negligible	7.37737e-08	2.20568e-07	-0.359	medium	2.7244e-08	1.5351e-07	-0.386	medium
PC	PC-O(40:7)	8.47303	7.89052	8.36903	8.48466	7.90689	8.42321	1.07307	1.00729	0.0249348	0.0500405	0.156	small	0.865733	0.896324	-0.0113	negligible	0.00868281	0.0177885	-0.182	small
PC	PC-O(40:8)	11.0668	9.90103	8.2511	10.4954	10.0297	8.15873	1.04643	1.28641	0.0444785	0.0830076	0.14	small	1.84373e-11	9.31399e-11	0.449	medium	1.9399e-06	8.88112e-06	0.331	medium
PC	PC-O(42:4)	0.371778	0.26534	0.254008	0.35866	0.11143	0.0382701	3.21871	9.3718	0.054139	0.0973173	0.134	small	0.00898801	0.0152225	0.174	small	0.360126	0.466411	0.0636	negligible
PC	PC-O(42:5)	1.36266	1.13507	1.10423	1.30951	1.124	1.05642	1.16504	1.23957	0.000883564	0.00244231	0.231	small	0.00019939	0.000439257	0.249	small	0.740904	0.819188	0.023	negligible
PC	PC-O(42:6)	1.01101	0.901476	1.09434	1.02117	0.94162	1.0617	1.08448	0.96182	0.0277715	0.0549804	0.153	small	0.37527	0.439816	-0.0593	negligible	0.00483887	0.0105805	-0.196	small
Cer	Cer(40:1)	0.699053	0.770163	0.912224	0.706071	0.768163	0.923025	0.919167	0.764953	0.0729737	0.128032	-0.124	small	1.01512e-07	3.00435e-07	-0.355	medium	0.000826337	0.00216176	-0.232	small
Cer	Cer(41:1)	1.0207	1.13801	1.12427	1.01399	1.13614	1.13634	0.892484	0.892332	0.0931725	0.160586	-0.117	small	0.030541	0.0470974	-0.144	small	0.75325	0.829708	-0.0218	negligible
Cer	Cer(42:1)	3.10226	3.42497	2.63774	3.10706	3.18792	2.61316	0.974635	1.189	0.120944	0.202494	-0.108	small	9.19481e-06	2.30263e-05	0.297	small	1.5278e-08	9.13562e-08	0.393	medium
Cer	Cer(42:2)	2.41452	2.42513	1.95462	2.38947	2.3251	1.89107	1.02769	1.26355	0.590647	0.670773	0.0374	negligible	2.35311e-08	7.74675e-08	0.373	medium	2.15162e-06	9.69885e-06	0.329	medium
Cer	Cer(43:1)	0.607592	0.618891	0.6181	0.615627	0.604241	0.638514	1.01884	0.964156	0.944307	0.957377	0.00486	negligible	0.735241	0.77771	-0.0226	negligible	0.523456	0.627824	-0.0443	negligible
SM	SM(30:1)	0.445269	0.37792	0.552665	0.44813	0.374125	0.578706	1.19781	0.774366	0.00554871	0.013326	0.193	small	4.77866e-05	0.000112915	-0.272	small	1.76772e-10	1.43873e-09	-0.443	medium
SM	SM(31:0)	0.661686	0.680442	0.575698	0.427967	0.527026	0.46735	0.812042	0.915731	0.425818	0.528663	-0.0553	negligible	0.983549	0.990129	0.00138	negligible	0.421769	0.532074	0.0558	negligible
SM	SM(32:1)	9.49464	9.35222	12.0707	9.64648	9.01648	11.8723	1.06987	0.812518	0.40318	0.509188	0.0581	negligible	1.56579e-09	5.95815e-09	-0.404	medium	2.65993e-10	2.05095e-09	-0.439	medium
SM	SM(33:1)	10.6844	10.2709	11.5047	10.7604	10.0907	11.3852	1.06637	0.945116	0.172397	0.261722	0.0945	negligible	0.0143008	0.0234085	-0.164	small	0.000490543	0.00133082	-0.243	small
SM	SM(33:2)	14.6054	20.426	25.7427	5.31	18.2	25.45	0.291758	0.208644	0.000608792	0.00171355	-0.238	small	1.00194e-05	2.48787e-05	-0.295	small	0.0915923	0.140505	-0.117	small
SM	SM(34:1)	120.327	121.436	123.582	118.539	116.412	122.997	1.01827	0.963759	0.746185	0.798789	0.0225	negligible	0.337652	0.403804	-0.0641	negligible	0.251934	0.338608	-0.0799	negligible
SM	SM(34:2)	16.9376	18.2157	18.2894	17.1809	17.4928	18.1673	0.982173	0.945706	0.165189	0.255836	-0.0966	negligible	0.0414213	0.0616063	-0.136	small	0.611714	0.722711	-0.0353	negligible
SM	SM(35:1)	3.24354	3.24329	4.11133	3.342	3.11472	3.97414	1.07297	0.840937	0.735633	0.795352	0.0235	negligible	2.4807e-10	1.06889e-09	-0.423	medium	2.43446e-09	1.69833e-08	-0.415	medium
SM	SM(36:1)	41.9396	41.7933	40.671	40.8062	39.5237	40.3083	1.03245	1.01235	0.590647	0.670773	0.0374	negligible	0.369743	0.436833	0.0599	negligible	0.636428	0.737049	0.0329	negligible
SM	SM(36:2)	6.55319	6.65563	7.01239	6.43855	6.40563	6.90254	1.00514	0.93278	0.844924	0.877882	-0.0136	negligible	0.10202	0.135872	-0.11	small	0.182116	0.258859	-0.0924	negligible
SM	SM(37:1)	2.46657	2.43605	3.15097	2.40159	2.29519	3.1673	1.04636	0.758244	0.697371	0.75959	0.027	negligible	6.23559e-07	1.74003e-06	-0.333	medium	8.49852e-06	3.11258e-05	-0.309	medium
SM	SM(38:1)	20.2851	21.3573	24.3947	20.0537	20.2185	24.206	0.991849	0.828459	0.352836	0.457438	-0.0646	negligible	3.85936e-06	1.00964e-05	-0.309	medium	0.00052583	0.00141347	-0.241	small
SM	SM(38:2)	9.52679	10.1841	14.8782	9.14856	9.54065	14.3789	0.958903	0.636251	0.214558	0.311216	-0.0862	negligible	2.11898e-20	2.95648e-19	-0.619	large	2.34095e-15	4.03141e-14	-0.55	large
SM	SM(38:3)	0.429969	0.434605	3.19745	0.0337695	0.0348545	3.19864	0.968872	0.0105574	0.753251	0.799646	-0.0218	negligible	1.23977e-27	2.42168e-26	-0.728	large	1.52937e-25	1.12027e-23	-0.723	large
SM	SM(39:1)	6.28395	7.55697	9.06192	6.24277	7.17524	8.6869	0.870044	0.718642	0.000461502	0.00131282	-0.243	small	1.68567e-14	1.14861e-13	-0.512	large	1.90923e-05	6.42363e-05	-0.297	small
SM	SM(39:2)	1.40352	1.47993	3.71229	1.23702	1.15319	3.36177	1.0727	0.367968	0.311095	0.416214	0.0702	negligible	1.38821e-27	2.54216e-26	-0.728	large	8.26775e-21	3.46065e-19	-0.651	large
SM	SM(40:1)	9.56878	20.8841	19.4499	3.39438	2.445	9.72894	1.38829	0.348895	0.371231	0.472916	-0.0621	negligible	0.0019274	0.0036434	-0.207	small	0.181355	0.258859	-0.0931	negligible
SM	SM(40:2)	26.6012	26.237	42.738	27.2143	27.0533	40.058	1.00595	0.679373	0.962855	0.969472	-0.00324	negligible	4.14584e-17	4.18873e-16	-0.562	large	2.47663e-15	4.03141e-14	-0.55	large
SM	SM(40:4)	8.65429	6.46172	10.7915	8.72798	4.89818	10.7666	1.78188	0.810651	1.81194e-05	8.42696e-05	0.298	small	0.000179249	0.000397879	-0.251	small	6.40517e-11	5.68701e-10	-0.454	medium
SM	SM(41:1)	15.39	18.1739	17.4149	14.8077	17.7145	17.3982	0.835909	0.851102	4.55571e-05	0.000164797	-0.284	small	0.000232676	0.000504993	-0.246	small	0.606823	0.719835	0.0358	negligible
SM	SM(41:2)	14.4215	16.1708	17.4912	14.2012	15.3584	17.3229	0.924652	0.819792	0.0186799	0.0393404	-0.163	small	1.88239e-07	5.4608e-07	-0.348	medium	0.00816292	0.0169627	-0.184	small
SM	SM(42:1)	23.3051	22.6447	19.6166	23.735	24.148	20.7118	0.982895	1.14596	0.912851	0.931935	0.00758	negligible	0.000481377	0.000986317	0.233	small	0.00473468	0.0104305	0.196	small
SM	SM(42:2)	74.3814	75.0347	56.7762	73.0203	72.7006	55.5911	1.0044	1.31352	0.877858	0.902499	0.0107	negligible	7.86447e-14	5.12064e-13	0.499	medium	4.07754e-12	4.11972e-11	0.482	medium
SM	SM(42:3)	32.2586	29.2595	28.919	31.8609	30.2689	29.7085	1.05259	1.07245	0.0501919	0.0919139	0.136	small	0.0494079	0.0713129	0.132	small	0.918394	0.944173	-0.00709	negligible
SM	SM(43:1)	6.08682	8.0651	6.61654	4.14204	5.80898	4.90991	0.713042	0.843609	0.00868295	0.01957	-0.182	small	0.0840013	0.113946	-0.116	small	0.236844	0.321275	0.082	negligible
SM	SM(44:1)	1.2863	1.75315	1.66381	1.02882	1.44771	1.39752	0.710656	0.736173	0.000117423	0.000369946	-0.268	small	3.46659e-05	8.25782e-05	-0.277	small	0.98328	0.993452	0.00146	negligible
SM	SM(44:2)	1.59048	1.56684	1.61531	1.52723	1.42083	1.43271	1.07489	1.06598	0.464675	0.562603	0.0508	negligible	0.988484	0.990129	0.000962	negligible	0.512901	0.626166	-0.0455	negligible
Hexoses	H1	7220.17	5844.74	6941.81	7012.56	5690.42	6782.22	1.23235	1.03396	1.08143e-15	3.16859e-14	0.557	large	0.0342057	0.0513963	0.142	small	1.37036e-09	9.79306e-09	-0.421	medium
Total	Acylcarnitines	105.852	100.14	106.31	104.075	98.8543	107.434	1.05282	0.968738	0.19303	0.287096	0.0904	negligible	0.609094	0.665912	-0.0341	negligible	0.0437439	0.0758401	-0.14	small
Total	Diglicerides	88.8936	124.219	112.824	82.296	110.784	107.41	0.742848	0.766185	1.8818e-09	2.02644e-08	-0.418	medium	1.6855e-06	4.48955e-06	-0.32	medium	0.107608	0.162453	0.112	small
Total	Triglicerides	1390.68	1889.48	1411.25	1232.93	1641.44	1269.15	0.751126	0.971464	3.47024e-05	0.000139285	-0.288	small	0.597594	0.659829	-0.0353	negligible	6.77156e-05	0.00021566	0.277	small
Total	Lysophosphatidylcholines	180.369	252.021	296.229	175.649	248.906	293.601	0.705685	0.598259	8.13405e-17	2.9791e-15	-0.579	large	9.44447e-28	1.97659e-26	-0.728	large	5.01917e-06	1.96082e-05	-0.317	medium
Total	Phosphatidylcholines	2317.83	2318.81	2191.9	2229.94	2178.69	2233.94	1.02352	0.998211	0.75679	0.800503	0.0215	negligible	0.112351	0.148283	0.106	small	0.278905	0.368105	0.0751	negligible
Total	Sphingomyelins	478.833	502.152	525.601	474.194	485.126	524.501	0.977464	0.904086	0.227742	0.325504	-0.0841	negligible	0.00243673	0.00451876	-0.202	small	0.0611837	0.0995658	-0.13	small
Total	Ceramides	7.84412	8.37716	7.24695	7.82951	8.05798	7.15832	0.971646	1.09376	0.271732	0.370314	-0.0765	negligible	0.0294481	0.0458952	0.146	small	0.00131165	0.0032569	0.223	small
Total	Cholesteryl:Esters	10181.7	10272.7	10333.2	10120.7	9514.93	10081.8	1.06366	1.00385	0.968424	0.97174	0.00275	negligible	0.881979	0.909929	-0.00989	negligible	0.785282	0.855345	-0.0189	negligible
Total	Lipids	14752	15467.9	14984.6	14795.5	14833.5	14822.4	0.997436	0.998186	0.213701	0.311216	-0.0862	negligible	0.675524	0.725013	-0.028	negligible	0.423117	0.532074	0.0557	negligible

## Sheet: Table S2
Table S2. Serum metabolites detected by the HRMS approach and not used in the quantitative analysis: differences between patients diagnosed with breast cancer (BC) or healthy women (Ctr_P and Ctr_N).
	BC vs Ctr_P		BC vs Ctr_N
Metabolites	p-value	FDR	p-value	FDR
AC(4:0-DC)	1	1	0.532151	1
AC(4:0-OH)	0.02975	0.20825	2.0203e-05	0.000316514
AC(4:1-DC)	1	1	0.748235	1
AC(5:1-DC)	0.7533	1	0.768568	1
AC(6:0-DC)	1	1	1	1
AC(6:0-OH)	0.02586	0.19395	0.0280375	0.161329
AC(6:1)	1	1	0.00542194	0.0509198
AC(7:0-DC)	0.4799	1	0.00018958	0.00254578
AC(8:1-OH)	0.7752	1	0.498802	0.98197
AC(9:0)	0.1836	0.621871	1	1
AC(11:0)	0.06856	0.327218	0.498538	0.98197
AC(12:0-DC)	0.2215	0.6755	0.284865	0.787567
AC(14:1-OH)	0.7752	1	1	1
AC(14:2-OH)	0.0495	0.28875	1	1
AC(15:0)	0.001323	0.027783	0.00829999	0.0650166
AC(16:0-OH)	0.0984	0.41328	0.573783	1
AC(16:1-OH)	0.3775	0.921802	0.252466	0.765542
AC(16:2)	0.2123	0.6755	1	1
AC(16:2-OH)	0.7752	1	0.748235	1
AC(17:0)	0.4589	1	1	1
AC(18:1-OH)	6.026e-06	0.00021091	0.621614	1
AC(19:0)	0.1259	0.489611	0.815388	1
Ac-Orn	1	1	1	1
c4-OH-Pro	0.775	1	0.675838	1
DOPA	0.06306	0.327218	0.796224	1
Dopamine	0.06813	0.327218	0.594388	1
Histamine	0.7351	1	1	1
Nitro-Tyr	1	1	0.497758	0.98197
PEA	1	1	0.498802	0.98197
Spermidine	0.375	0.921802	3.89514e-11	2.24144e-09
DG(38:0)	4.326e-07	2.27115e-05	0.00564349	0.0509198
TG(44:4)	0.3377	0.886463	0.534868	1
TG(55:8)	0.1781	0.621871	0.0171439	0.115109
TG(55:9)	0.5808	1	0.143137	0.517497
LPC(20:2)	1	1	0.082919	0.371161
LPC(24:0)	0.2249	0.6755	0.682136	1
LPC(24:1)	0.3775	0.921802	1	1
LPC-O(17:1)	0.5785	1	1.56705e-05	0.000294605
PC(27:0)	1	1	0.0291765	0.161329
PC(27:1)	1	1	0.621614	1
PC(28:1)	0.2982	0.823974	0.47766	0.98197
PC(29:1)	0.4799	1	0.607937	1
PC(29:2)	0.02308	0.186415	0.682136	1
PC(30:1)	0.3115	0.838654	0.0059587	0.0509198
PC(30:3)	1	1	0.357438	0.93331
PC(31:1)	0.01854	0.162225	0.270625	0.787567
PC(31:2)	1	1	0.721556	1
PC(33:5)	1	1	0.158072	0.550326
PC(35:0)	1	1	4.76903e-11	2.24144e-09
PC(36:0)	1	1	1	1
PC(37:0)	1	1	1	1
PC(38:0)	0.501	1	1	1
PC(39:1)	0.6627	1	0.445667	0.98197
PC(39:2)	0.06368	0.327218	0.569388	1
PC(41:1)	0.7597	1	0.0695482	0.326876
PC(41:2)	0.1652	0.598138	0.0157675	0.114011
PC(41:3)	0.004325	0.0567656	0.643666	1
PC(42:0)	1	1	1	1
PC(42:1)	0.7288	1	0.569388	1
PC(42:3)	0.03992	0.246565	0.332512	0.893033
PC(43:2)	1	1	0.12061	0.47239
PC(44:3)	2.185e-07	2.27115e-05	0.126847	0.476943
PC(44:5)	0.09161	0.41328	1	1
PC(44:6)	0.2608	0.740108	1	1
PC(44:7)	1	1	0.202287	0.679107
PC(44:10)	0.7066	1	5.51731e-10	1.72876e-08
PC(44:12)	0.1191	0.480981	1	1
PC(46:1)	0.095	0.41328	0.497758	0.98197
PC-O(26:0)	0.8286	1	1	1
PC-O(26:1)	0.501	1	0.0589886	0.308051
PC-O(28:1)	0.6265	1	0.246637	0.765542
PC-O(29:0)	1	1	1	1
PC-O(30:2)	1	1	1	1
PC-O(31:0)	1	1	1	1
PC-O(31:3)	1	1	0.878869	1
PC-O(32:0)	0.01502	0.156068	0.00385645	0.0453133
PC-O(32:2)	1	1	1	1
PC-O(33:0)	0.6509	1	0.770537	1
PC-O(33:2)	1	1	1	1
PC-O(33:3)	0.2313	0.6755	0.439369	0.98197
PC-O(33:4)	1	1	1	1
PC-O(33:6)	0.6265	1	0.721556	1
PC-O(35:4)	0.6253	1	1	1
PC-O(36:0)	1	1	1	1
PC-O(36:1)	0.003892	0.0567656	0.02592	0.161329
PC-O(37:7)	1	1	1	1
PC-O(38:0)	1	1	1	1
PC-O(38:2)	1	1	1	1
PC-O(40:0)	0.501	1	0.497758	0.98197
PC-O(40:3)	0.01635	0.156068	0.893583	1
PC-O(42:0)	1	1	1	1
PC-O(42:1)	0.4589	1	1	1
PC-O(42:2)	0.459	1	1	1
PC-O(42:3)	0.2316	0.6755	0.408674	0.98197
PC-O(44:4)	0.501	1	0.497758	0.98197
PC-O(44:5)	0.006714	0.07833	2.41549e-06	5.67641e-05
PC-O(44:6)	0.003015	0.0527625	0.107911	0.441028
Cer(34:0)	0.1501	0.562875	1	1
Cer(34:1)	0.6578	1	0.501432	0.98197
Cer(38:1)	0.6081	1	0.100017	0.427345
Cer(44:0)	0.0002799	0.00734737	0.0651056	0.322101
SM(31:1)	1	1	0.283468	0.787567
SM(32:2)	1	1	1	1
SM(36:0)	0.03792	0.246565	0.580125	1
SM(43:2)	0.5778	1	0.225362	0.730483

## Sheet: Table S3
Table S3. Serum metabolites quantitated by the HRMS approach: differences between healthy women and women patients diagnosed with breast (BC), colorectal (CC), head and neck (HC), and lung (LC) cancers.
Metabolite class	Compound	Concentration [µM] - mean value						Concentration [µM] - median value						Kruskal-Wallis test (against Ctr_P)				Kruskal-Wallis test (against Ctr_N)				BC/Ctr_P				BC/Ctr_N				CC/Ctr_P				CC/Ctr_N				HC/Ctr_P				HC/Ctr_N				LC/Ctr_P
		BC	CC	HC	LC	Ctr_P	Ctr_N	BC	CC	HC	LC	Ctr_P	Ctr_N	p-value	FDR	effect size (t)	effect	p-value	FDR	effect size (t)	effect	fold-change	p-value	effect size (r)	effect	fold-change	p-value	effect size (r)	effect	fold-change	p-value	effect size (r)	effect	fold-change	p-value	effect size (r)	effect	fold-change	p-value	effect size (r)	effect	fold-change	p-value	effect size (r)	effect	fold-change	p-value	effect size (r)	effect
AC	AC(0:0)	43.7055	37.2018	49.1545	46.148	42.3122	43.7363	40.8146	35.7284	48.3806	47.29	41.1762	44.3636	0.00180404	0.00538604	0.0811988	medium	0.00250737	0.00415062	0.0766502	medium	0.991219	0.588873	0.0647275	negligible	0.920003	0.649487	-0.0544215	negligible	0.867695	0.108345	-0.200266	small	0.805354	0.108345	-0.311255	medium	1.17497	0.0204716	0.285949	small	1.09055	0.0204716	0.175646	small	1.14848	0.0647957	0.222231	small
AC	AC(2:0)	13.4125	12.4428	11.6336	11.4019	8.46948	9.1814	12.8783	11.8099	10.6316	9.70578	7.499	8.45806	0.000304551	0.00115461	0.105466	medium	0.00306897	0.00496801	0.0738468	medium	1.71734	5.67431e-06	0.561032	large	1.52261	9.08427e-05	0.479841	medium	1.57486	0.00115507	0.410391	medium	1.39629	0.00115507	0.334251	medium	1.41773	0.00793033	0.328439	medium	1.25698	0.00793033	0.254334	small	1.29428	0.0149702	0.293948	small
AC	AC(3:0)	58.6907	50.4065	45.9746	49.6373	48.5368	59.122	51.7382	45.6378	45.6478	43.7082	44.9368	58.5657	0.0845012	0.125045	0.0259295	small	0.0148599	0.0211712	0.0516105	small	1.15135	0.0242693	0.271813	small	0.883422	0.909204	-0.0136521	negligible	1.0156	0.8432	0.0245738	negligible	0.779259	0.8432	-0.266234	small	1.01582	0.695882	-0.0478392	negligible	0.779429	0.695882	-0.339729	medium	0.972659	0.64553	0.0550811	negligible
AC	AC(3:0-DC)	0.00675834	0.00733749	0.00661243	0.00743297	0.00667654	0.00759961	0.00672314	0.00613484	0.00648313	0.00669688	0.00633538	0.00677291	0.890339	0.902662	-0.017749	small	0.786393	0.802834	-0.0140507	small	1.06121	0.658	0.0530077	negligible	0.992652	0.417692	-0.0971134	negligible	0.968346	0.874252	0.0196608	negligible	0.90579	0.874252	-0.116279	small	1.02332	0.835864	0.0253527	negligible	0.957214	0.835864	-0.12388	small	1.05706	0.33701	0.115094	small
AC	AC(3:0-OH)	0.0495558	0.0458265	0.0475118	0.0496297	0.0444004	0.0534732	0.0526885	0.0477673	0.0490922	0.053067	0.0465969	0.0545862	0.115545	0.158942	0.0210764	small	0.0705772	0.08952	0.0286803	small	1.13073	0.0291461	0.263077	small	0.965235	0.301812	-0.123809	small	1.02512	0.773377	0.0357769	negligible	0.87508	0.773377	-0.351844	medium	1.05355	0.231394	0.14676	small	0.899351	0.231394	-0.23276	small	1.13885	0.0462316	0.240084	small
AC	AC(3:1)	0.0155495	0.0205651	0.01738	0.0240263	0.0204582	0.0185117	0.0135795	0.0153969	0.0148571	0.0142571	0.0145472	0.0145833	0.352408	0.41282	0.00257892	small	0.415644	0.444466	-0.000435781	small	0.933475	0.931074	-0.010354	negligible	0.931164	0.252175	-0.137353	small	1.05841	0.104519	0.202485	small	1.05579	0.104519	0.0791246	negligible	1.0213	0.28426	0.131254	small	1.01877	0.28426	0.0113516	negligible	0.980056	0.814402	0.0281038	negligible
AC	AC(4:0)	0.21769	0.109101	0.161396	0.265347	0.114553	0.191279	0.108962	0.0534125	0.162397	0.234197	0.0839947	0.148102	3.76971e-05	0.00024545	0.133474	medium	0.000300316	0.000619665	0.105655	medium	1.29725	0.030691	0.260575	small	0.735724	0.853005	-0.0221813	negligible	0.635903	0.416921	-0.100947	small	0.360647	0.416921	-0.371915	medium	1.93342	0.0612627	0.230252	small	1.09652	0.0612627	-0.0527934	negligible	2.78824	4.71406e-05	0.499885	medium
AC	AC(4:1)	0.0241701	0.0217218	0.018257	0.0240328	0.0197758	0.0238959	0.0223602	0.018603	0.0167539	0.0255576	0.0173214	0.0195046	0.0196967	0.0379681	0.0475533	small	0.055653	0.0712066	0.0322699	small	1.2909	0.0716018	0.216758	small	1.14641	0.589769	0.0645718	negligible	1.07399	0.460995	0.0916579	negligible	0.953772	0.460995	-0.0563953	negligible	0.967237	0.47039	-0.0883948	negligible	0.858969	0.47039	-0.229862	small	1.47549	0.0213037	0.27791	small
AC	AC(5:0)	0.229028	0.164472	0.182995	0.260066	0.179411	0.481071	0.189022	0.151753	0.171568	0.244955	0.166922	0.255818	0.0355726	0.0609518	0.0389277	small	0.0033459	0.00532798	0.0726458	medium	1.13239	0.116998	0.188357	small	0.738893	0.13714	-0.178558	small	0.909125	0.525204	-0.0789757	negligible	0.593208	0.525204	-0.446755	medium	1.02783	0.745494	0.0397223	negligible	0.670665	0.745494	-0.32608	medium	1.46748	0.0258515	0.268823	small
AC	AC(5:0-DC)	0.156094	0.157934	0.178189	0.204198	0.137408	0.235199	0.152237	0.144745	0.16746	0.205932	0.136471	0.22643	2.34046e-06	2.70281e-05	0.170194	large	1.6861e-08	9.14863e-08	0.23443	large	1.11552	0.0622074	0.224439	small	0.672335	8.10863e-09	-0.727332	large	1.06063	0.152783	0.178178	small	0.639248	0.152783	-0.729666	large	1.22707	0.000273853	0.454523	medium	0.739565	0.000273853	-0.493004	medium	1.50898	6.705e-08	0.676559	large
AC	AC(5:0-OH)	0.0114899	0.0101489	0.0106218	0.0108927	0.0110309	0.0134247	0.00997975	0.00905992	0.00922618	0.0101953	0.0100261	0.0129504	0.363736	0.420658	0.00200959	small	0.00325765	0.0052158	0.0730175	medium	0.995382	0.802971	0.0298703	negligible	0.770615	0.027049	-0.266664	small	0.903638	0.183666	-0.165618	small	0.699588	0.183666	-0.459594	medium	0.920221	0.345274	-0.11564	small	0.712426	0.345274	-0.408773	medium	1.01688	0.770678	0.034898	negligible
AC	AC(5:1)	0.0344268	0.0293006	0.025303	0.0320118	0.0261077	0.0328176	0.0281258	0.0236441	0.0231958	0.0233662	0.0224842	0.0298301	0.0275901	0.049855	0.0426566	small	0.0151015	0.0213515	0.0513792	small	1.25091	0.00513439	0.339099	medium	0.942867	0.963619	-0.00546018	negligible	1.05159	0.518114	0.0803338	negligible	0.792625	0.518114	-0.26963	small	1.03165	0.9807	-0.00295999	negligible	0.777596	0.9807	-0.349641	medium	1.03922	0.128979	0.182383	small
AC	AC(6:0)	0.0856696	0.0655247	0.0801322	0.0763359	0.0538952	0.0687993	0.0693022	0.0576027	0.0659588	0.0589228	0.0522485	0.064942	0.00430847	0.0111715	0.0691209	medium	0.14315	0.168446	0.0176904	small	1.3264	0.000214757	0.452593	medium	1.06714	0.0632131	0.223572	small	1.10248	0.265774	0.13851	small	0.886987	0.265774	-0.0801484	negligible	1.26241	0.0105179	0.316228	medium	1.01566	0.0105179	0.0948856	negligible	1.12774	0.0420142	0.244976	small
AC	AC(7:0)	0.0120289	0.0108562	0.0140799	0.0153607	0.00978991	0.0434258	0.00519583	0.00576283	0.00580095	0.00531625	0.00502705	0.0299723	0.524538	0.56712	-0.00492325	small	8.844e-07	3.01313e-06	0.182946	large	1.03357	0.828487	0.0259356	negligible	0.173355	1.10694e-07	-0.664169	large	1.14636	0.522021	0.0795843	negligible	0.192272	0.522021	-0.624453	large	1.15395	0.103433	0.200073	small	0.193544	0.103433	-0.498087	medium	1.05753	0.426929	0.0951955	negligible
AC	AC(8:0)	0.21876	0.152289	0.211975	0.16286	0.15232	0.136045	0.18088	0.113861	0.15953	0.136681	0.107807	0.123823	0.0116356	0.0245268	0.055108	small	0.00413493	0.0064788	0.0696951	medium	1.67782	0.00247571	0.367464	medium	1.46079	0.000876157	0.405254	medium	1.05616	0.924207	0.0118186	negligible	0.919547	0.924207	0.0193933	negligible	1.47978	0.0339365	0.261317	small	1.28837	0.0339365	0.292342	small	1.26784	0.278043	0.130087	small
AC	AC(8:1)	0.245041	0.189265	0.173587	0.142272	0.173943	0.180965	0.231723	0.138932	0.185304	0.103457	0.150919	0.164538	0.000138661	0.000656955	0.116065	medium	0.000248482	0.000523778	0.108214	medium	1.53541	0.00276534	0.363269	medium	1.40833	0.00769881	0.322558	medium	0.920572	0.64934	-0.0565012	negligible	0.844379	0.64934	-0.0923321	negligible	1.22783	0.578153	0.068074	negligible	1.12621	0.578153	0.01216	negligible	0.685516	0.0626479	-0.224058	small
AC	AC(10:0)	0.330352	0.229102	0.319469	0.256678	0.223715	0.201635	0.245023	0.173223	0.253456	0.206565	0.153472	0.171499	0.00323765	0.00870304	0.0731032	medium	0.00118572	0.00213138	0.0869682	medium	1.59653	0.00066411	0.414897	medium	1.42871	0.000222615	0.451429	medium	1.1287	0.760712	0.037838	negligible	1.01006	0.760712	0.0602177	negligible	1.65149	0.00959855	0.320221	medium	1.47789	0.00959855	0.358339	medium	1.34595	0.129824	0.181978	small
AC	AC(10:1)	0.0923762	0.0764784	0.0830628	0.0824814	0.0682136	0.0681842	0.079466	0.0487201	0.0652064	0.0646701	0.063719	0.0637804	0.144206	0.187854	0.0175732	small	0.131518	0.156645	0.0190367	small	1.24713	0.0553191	0.230712	small	1.24593	0.0403741	0.246992	small	0.764609	0.585063	-0.0678595	negligible	0.763873	0.585063	-0.0493711	negligible	1.02334	0.370619	0.109685	small	1.02236	0.370619	0.120737	small	1.01493	0.347241	0.112673	small
AC	AC(10:2)	0.028289	0.0200157	0.0183877	0.0189699	0.0199081	0.0287683	0.0239898	0.0145697	0.0166968	0.0162949	0.016514	0.0251919	0.00389914	0.0102004	0.0705143	medium	0.000385164	0.000783701	0.102288	medium	1.45269	0.0068159	0.327597	medium	0.95228	0.941857	0.00873113	negligible	0.882261	0.291063	-0.131384	small	0.578347	0.291063	-0.423086	medium	1.01107	0.847359	-0.023554	negligible	0.662783	0.847359	-0.336308	medium	0.986734	0.778276	-0.0337097	negligible
AC	AC(10:3)	0.0814752	0.0615229	0.0568327	0.0475866	0.0636591	0.0593466	0.0764826	0.040483	0.0460879	0.0293205	0.0618837	0.0535462	0.00132008	0.00411472	0.0854955	medium	0.00297043	0.0048352	0.0743001	medium	1.23591	0.137108	0.178573	small	1.42835	0.04702	0.239212	small	0.654179	0.132691	-0.187439	small	0.756039	0.132691	-0.106188	small	0.74475	0.495647	-0.0834292	negligible	0.860712	0.495647	-0.00542595	negligible	0.4738	0.0087954	-0.316982	medium
AC	AC(12:0)	0.102116	0.0733499	0.0869896	0.0795862	0.0668624	0.0817133	0.0869132	0.0673446	0.077207	0.0652742	0.0604933	0.0769823	0.0390838	0.0665788	0.0375376	small	0.174637	0.202247	0.0144926	small	1.43674	0.00384562	0.350543	medium	1.129	0.165107	0.166662	small	1.11326	0.55287	0.0737641	negligible	0.874806	0.55287	-0.103015	small	1.27629	0.0770044	0.217422	small	1.00292	0.0770044	0.039171	negligible	1.07903	0.425621	0.0954656	negligible
AC	AC(12:1)	0.139522	0.116169	0.141108	0.111348	0.0801518	0.0939391	0.118599	0.101841	0.133253	0.0850412	0.0783542	0.0869314	0.000175136	0.000748432	0.112926	medium	0.00435428	0.00675028	0.0689732	medium	1.51362	9.54858e-06	0.546447	large	1.36428	0.000640973	0.416119	medium	1.29976	0.016449	0.300667	medium	1.17152	0.016449	0.17264	small	1.70066	0.00028322	0.453395	medium	1.53286	0.00028322	0.326746	medium	1.08534	0.0732403	0.215505	small
AC	AC(13:0)	0.059967	0.0367702	0.0329618	0.0376179	0.0564098	0.267213	0.0402373	0.0276859	0.0325889	0.0323786	0.0442192	0.248028	0.0176905	0.0344051	0.0491038	small	6.19573e-16	2.59335e-14	0.453072	large	0.909951	0.577832	-0.0666556	negligible	0.162229	3.1564e-12	-0.901269	large	0.626106	0.00539813	-0.349811	medium	0.111624	0.00539813	-1.21353	large	0.736986	0.0158913	-0.297729	small	0.131392	0.0158913	-1.16709	large	0.732228	0.0279424	-0.265108	small
AC	AC(14:0)	0.0361007	0.0333544	0.0310092	0.030359	0.0275452	0.0446741	0.0353523	0.0293979	0.0298626	0.0245309	0.0238385	0.0438147	0.078896	0.117942	0.0269813	small	0.000686728	0.00129814	0.0944326	medium	1.48299	0.00809152	0.320484	medium	0.806858	0.0238708	-0.272593	small	1.23321	0.113279	0.197494	small	0.670959	0.113279	-0.375949	medium	1.2527	0.209331	0.153984	small	0.681565	0.209331	-0.429677	medium	1.02905	0.613404	0.0605025	negligible
AC	AC(14:0-OH)	0.0100077	0.00900342	0.00848217	0.00878259	0.00800645	0.0103077	0.0120455	0.00988685	0.00971069	0.00961335	0.00646921	0.010244	0.84529	0.872078	-0.0160883	small	0.646398	0.669239	-0.00931998	small	1.86198	0.300004	0.124274	small	1.17586	0.773811	-0.0344075	negligible	1.52829	0.726595	0.0434451	negligible	0.965132	0.726595	-0.119434	small	1.50106	0.963139	0.00565481	negligible	0.947935	0.963139	-0.156772	small	1.48602	0.772672	0.0345858	negligible
AC	AC(14:1)	0.165457	0.150551	0.152492	0.1429	0.0956766	0.108632	0.143704	0.135504	0.150504	0.128304	0.0850973	0.0988001	0.000428194	0.00153001	0.100853	medium	0.00638956	0.00965021	0.0635958	medium	1.6887	1.79208e-05	0.528434	large	1.45449	0.000327948	0.438738	medium	1.59234	0.00469642	0.355595	medium	1.3715	0.00469642	0.266105	small	1.76861	0.000357395	0.445536	medium	1.52332	0.000357395	0.353543	medium	1.50774	0.0110603	0.307215	medium
AC	AC(14:2)	0.0434456	0.0422445	0.034775	0.0357124	0.0222261	0.02523	0.0388986	0.0384454	0.0317844	0.0291828	0.0167261	0.020018	0.00470328	0.0117783	0.0678951	medium	0.0187279	0.0258833	0.0482819	small	2.32562	0.000231538	0.450154	medium	1.94319	0.00114347	0.395824	medium	2.29852	0.00351983	0.367355	medium	1.92054	0.00351983	0.315187	medium	1.90028	0.0260237	0.274453	small	1.58779	0.0260237	0.225491	small	1.74474	0.0562578	0.22982	small
AC	AC(16:0)	0.137712	0.124527	0.123321	0.10606	0.122513	0.111076	0.134955	0.126048	0.125583	0.0990158	0.111281	0.105496	0.00574437	0.0135734	0.0650922	medium	0.00206853	0.00352372	0.0793111	medium	1.21274	0.106454	0.19403	small	1.27924	0.0062722	0.331003	medium	1.1327	0.553347	0.0736754	negligible	1.19481	0.553347	0.209781	small	1.12853	0.60702	0.0629584	negligible	1.19041	0.60702	0.197432	small	0.889784	0.0332443	-0.25667	small
AC	AC(16:1)	0.0435782	0.0422123	0.0423375	0.0322785	0.0258347	0.0341854	0.0378142	0.0400541	0.0401145	0.0267179	0.0217571	0.0307892	7.37528e-05	0.000392901	0.124523	medium	0.0124334	0.0178578	0.0541618	small	1.73801	2.49475e-05	0.518795	large	1.22817	0.0391846	0.248499	small	1.84096	0.00128983	0.406282	medium	1.30091	0.00128983	0.155685	small	1.84374	0.000434933	0.438822	medium	1.30288	0.000434933	0.181151	small	1.22801	0.31313	0.120936	small
AC	AC(18:0)	0.0464973	0.0349786	0.041736	0.0371158	0.0498356	0.0507218	0.0412561	0.0361726	0.0403111	0.0373454	0.0481117	0.0440522	0.0162199	0.0325509	0.050353	small	0.00806713	0.0120595	0.0603075	medium	0.857505	0.162612	-0.167658	small	0.936526	0.118184	-0.187745	small	0.751845	0.00231573	-0.383947	medium	0.821129	0.00231573	-0.41226	medium	0.837864	0.148478	-0.177371	small	0.915075	0.148478	-0.202847	small	0.776221	0.00439164	-0.345321	medium
AC	AC(18:1)	0.208489	0.204482	0.201553	0.168065	0.189991	0.14087	0.202527	0.209291	0.194305	0.161222	0.173167	0.133249	0.0714593	0.108485	0.0284914	small	2.79413e-05	7.05758e-05	0.137457	medium	1.16955	0.219037	0.147476	small	1.51992	6.93633e-06	0.555435	large	1.2086	0.390737	0.106743	small	1.57068	0.390737	0.497279	medium	1.12207	0.51622	0.0794846	negligible	1.45821	0.51622	0.463451	medium	0.931021	0.149117	-0.173254	small
AC	AC(18:2)	0.0687333	0.0735109	0.0591712	0.0562747	0.0848088	0.0590333	0.0649968	0.0676049	0.0549474	0.053223	0.0795261	0.0576622	0.000155763	0.000702133	0.114503	medium	0.0427156	0.0556252	0.0362206	small	0.817302	0.0390565	-0.248664	small	1.1272	0.0732739	0.215479	small	0.850098	0.068872	-0.227162	small	1.17243	0.068872	0.21079	small	0.690935	0.00016804	-0.470678	medium	0.952919	0.00016804	-0.0134539	negligible	0.669252	1.15815e-05	-0.540969	large
AA	Ala	353.299	316.601	365.594	348.438	444.04	433.284	327.077	310.316	361.79	337.174	436.653	429.065	5.62997e-06	5.25282e-05	0.15865	large	9.73666e-06	2.74312e-05	0.151422	large	0.749054	3.60066e-05	-0.507952	large	0.762302	6.11734e-05	-0.491993	medium	0.710668	1.45488e-07	-0.682168	large	0.723237	1.45488e-07	-0.670143	large	0.828553	0.000658489	-0.424384	medium	0.843207	0.000658489	-0.41197	medium	0.772177	3.30161e-05	-0.510529	large
AA	Arg	110.515	110.024	122.631	137.947	99.2895	168.595	113.381	107.204	125.177	135.074	101.926	159.29	0.00560543	0.0134622	0.065436	medium	2.91594e-05	7.30231e-05	0.13689	medium	1.11239	0.193198	0.15617	small	0.711793	3.38086e-06	-0.57529	large	1.05178	0.22855	0.149917	small	0.673012	0.22855	-0.553557	large	1.22812	0.00920136	0.322053	medium	0.785846	0.00920136	-0.399344	medium	1.32521	0.00038196	0.433668	medium
AA	Asn	43.291	41.4548	47.138	47.3283	62.1288	51.3366	43.0329	42.2647	47.3891	44.0128	62.9523	49.2722	8.18484e-09	2.9977e-07	0.24377	large	0.000230477	0.000496542	0.109228	medium	0.683579	5.31214e-09	-0.737246	large	0.873371	0.000166417	-0.460791	medium	0.671376	7.60604e-10	-0.81139	large	0.85778	7.60604e-10	-0.525437	large	0.752777	7.10474e-05	-0.498213	medium	0.961782	7.10474e-05	-0.207551	small	0.699145	1.26718e-07	-0.660803	large
AA	Asp	17.5059	20.9672	23.8376	23.6572	39.0324	45.9888	16.1932	18.4489	21.9515	19.3176	36.2244	44.3387	2.25291e-09	1.3202e-07	0.260407	large	2.47547e-15	7.25313e-14	0.435521	large	0.447024	2.88253e-12	-0.903179	large	0.365216	1.68293e-20	-1.27684	large	0.509296	9.29774e-08	-0.693731	large	0.416091	9.29774e-08	-1.05259	large	0.605987	4.01997e-06	-0.583183	large	0.495088	4.01997e-06	-0.929076	large	0.533275	1.3327e-05	-0.53696	large
AA	Cit	30.2696	26.7977	29.1604	26.8936	31.6875	34.1044	29.7253	25.156	28.4117	25.2378	29.3579	33.3166	0.0343227	0.0598605	0.0394546	small	0.005636	0.0086458	0.0653596	medium	1.01251	0.652259	-0.0539603	negligible	0.892205	0.154848	-0.170832	small	0.856872	0.0165039	-0.300511	medium	0.755057	0.0165039	-0.39824	medium	0.967771	0.348407	-0.114889	small	0.852778	0.348407	-0.231262	small	0.85966	0.0109916	-0.307483	medium
AA	Gln	677.738	609.341	674.093	639.845	644.697	656.405	664.156	629.947	658.331	631.79	657.452	653.195	0.186775	0.237936	0.0133978	small	0.174604	0.202247	0.0144956	small	1.0102	0.251945	0.13742	small	1.01678	0.462164	0.0880931	negligible	0.958164	0.366185	-0.112398	small	0.964408	0.366185	-0.158652	small	1.00134	0.513958	0.0799143	negligible	1.00786	0.513958	0.0312272	negligible	0.960966	0.425549	-0.0954803	negligible
AA	Glu	57.3824	68.536	69.7794	62.0599	132.506	129.651	59.7518	58.2819	63.2641	62.5286	130.252	117.355	4.25982e-11	1.24813e-08	0.311348	large	1.80677e-12	2.52087e-11	0.351718	large	0.45874	7.74466e-13	-0.930648	large	0.509153	1.31197e-14	-1.01386	large	0.447455	1.17157e-09	-0.801226	large	0.496628	1.17157e-09	-0.873418	large	0.485705	1.42535e-08	-0.729796	large	0.539082	1.42535e-08	-0.796577	large	0.480059	4.72225e-11	-0.843422	large
AA	Gly	262.617	307.864	315.167	263.771	362.661	336.593	250.03	304.36	319.624	252.406	341.183	316.98	0.000769561	0.0025335	0.09288	medium	9.47302e-05	0.000222048	0.121174	medium	0.732831	0.000238611	-0.449175	medium	0.788786	3.70652e-05	-0.507089	large	0.892072	0.0612054	-0.233819	small	0.960186	0.0612054	-0.269342	small	0.93681	0.271381	-0.134832	small	1.00834	0.271381	-0.163442	small	0.739795	0.000329031	-0.438628	medium
AA	His	82.2217	72.038	82.3357	77.6478	97.6829	96.1844	82.3661	73.3131	81.008	81.315	100.148	94.5198	7.85728e-08	1.45131e-06	0.214487	large	4.29875e-08	2.09155e-07	0.222311	large	0.822444	2.41918e-05	-0.519696	large	0.871416	1.34441e-05	-0.53671	large	0.732048	4.95994e-10	-0.821384	large	0.775637	4.95994e-10	-0.838087	large	0.808883	9.72943e-05	-0.488288	medium	0.857047	9.72943e-05	-0.497609	medium	0.811949	6.88351e-07	-0.617702	large
AA	Lys	159.096	141.947	174.049	167.613	189.413	175.512	161.49	142.862	177.262	169.023	191.37	172.169	4.31391e-06	4.51419e-05	0.162156	large	0.000686353	0.00129814	0.0944401	medium	0.843865	0.00012592	-0.469636	medium	0.937976	0.0317431	-0.258933	small	0.746525	7.76686e-08	-0.698344	large	0.829781	7.76686e-08	-0.492651	medium	0.92628	0.0801332	-0.215135	small	1.02958	0.0801332	-0.00389638	negligible	0.883229	0.0038785	-0.350209	medium
AA	Met	20.7297	20.0028	23.5744	24.5431	27.4708	24.5623	20.1648	20.0382	22.2697	22.4391	27.5533	23.3606	4.04178e-05	0.000257444	0.132547	medium	0.0354771	0.0464053	0.0389673	small	0.73185	6.70127e-06	-0.556399	large	0.863201	0.010338	-0.310117	medium	0.727252	6.80843e-06	-0.576942	large	0.857778	6.80843e-06	-0.337143	medium	0.808242	0.00660185	-0.33619	medium	0.953303	0.00660185	-0.104859	small	0.814389	0.0022261	-0.371461	medium
AA	Orn	81.868	75.8172	93.1813	89.0369	139.011	96.2589	80.8947	77.6455	85.7087	83.0134	145.458	95.9372	2.77106e-10	2.7064e-08	0.287349	large	0.00624813	0.0094855	0.0639108	medium	0.556137	1.95169e-10	-0.8123	large	0.843205	0.00706275	-0.326131	medium	0.5338	1.0004e-11	-0.909923	large	0.809337	1.0004e-11	-0.430204	medium	0.589233	2.50505e-06	-0.596355	large	0.893384	2.50505e-06	-0.112205	small	0.570703	6.22055e-09	-0.733555	large
AA	Phe	64.7075	65.4146	75.4345	77.6211	87.156	116.519	63.3667	62.2414	68.701	74.56	86.9815	112.238	7.92523e-08	1.45131e-06	0.214376	large	4.11265e-16	2.35125e-14	0.458261	large	0.728509	5.76785e-09	-0.735323	large	0.564575	2.3099e-20	-1.27085	large	0.715571	1.22011e-07	-0.686727	large	0.554549	1.22011e-07	-1.22587	large	0.789835	0.000483197	-0.435192	medium	0.612101	0.000483197	-0.944416	large	0.857194	0.0128596	-0.300662	medium
AA	Pro	168.468	158.258	175.404	201.148	197.756	223.45	163.842	159.347	172.343	185.759	203.853	226.736	0.0108942	0.0231304	0.0560458	small	1.79456e-05	4.73698e-05	0.143332	large	0.803727	0.0225787	-0.275203	small	0.722613	3.61191e-05	-0.507859	large	0.781677	0.0017898	-0.393895	medium	0.702788	0.0017898	-0.624165	large	0.845427	0.0990761	-0.202664	small	0.760104	0.0990761	-0.435979	medium	0.911242	0.688224	-0.0480465	negligible
AA	Ser	119.626	128.605	143.16	131.183	161.062	181.007	114.86	129.556	140.03	121.255	166.054	181.405	4.96423e-06	4.8484e-05	0.160307	large	2.15003e-11	2.24985e-10	0.320096	large	0.691701	2.07901e-07	-0.648384	large	0.633168	6.09639e-14	-0.982839	large	0.780203	0.000258748	-0.463389	medium	0.714181	0.000258748	-0.779631	large	0.843277	0.0446584	-0.247218	small	0.771917	0.0446584	-0.549026	large	0.730214	3.54046e-05	-0.508454	large
AA	Thr	111.968	98.7113	112.244	119.074	138.948	123.241	112.686	99.1651	112.009	104.657	142.559	121.981	1.94901e-05	0.000142765	0.142237	large	0.0247853	0.0333123	0.04422	small	0.790455	0.000446615	-0.428423	medium	0.9238	0.133126	-0.180416	small	0.695608	2.75234e-07	-0.665486	large	0.812952	2.75234e-07	-0.421532	medium	0.785705	0.000521983	-0.432515	medium	0.918248	0.000521983	-0.181245	small	0.734132	0.000212162	-0.452987	medium
AA	Trp	55.5497	47.4217	55.6315	60.6879	65.5238	66.8994	54.7843	46.2413	55.7167	60.181	63.8779	67.1784	3.7197e-06	4.03657e-05	0.164106	large	1.94595e-07	8.03045e-07	0.202698	large	0.857642	0.000688892	-0.413632	medium	0.815505	3.56728e-05	-0.50823	large	0.723902	2.52324e-08	-0.726759	large	0.688336	2.52324e-08	-0.81144	large	0.872237	0.00105394	-0.407558	medium	0.829384	0.00105394	-0.492112	medium	0.942127	0.0330859	-0.256904	small
AA	Tyr	61.6777	58.8095	69.539	78.5321	73.9079	83.001	60.8255	57.4989	64.2917	71.4244	74.1242	81.1843	0.000144641	0.000672695	0.115498	medium	2.15522e-07	8.77056e-07	0.201369	large	0.82059	0.000627126	-0.416871	medium	0.749228	3.28898e-07	-0.636741	large	0.775711	8.41517e-05	-0.500412	large	0.708252	8.41517e-05	-0.716382	large	0.867351	0.0766171	-0.21771	small	0.791923	0.0766171	-0.437713	medium	0.963578	0.670827	-0.0508915	negligible
AA	Val	203.209	188.373	213.953	219.111	229.38	245.506	204.059	189.872	209.138	197.262	226.601	238.037	0.0053722	0.0130087	0.0660323	medium	0.000117629	0.000265117	0.118273	medium	0.900518	0.0163061	-0.290122	small	0.857255	0.000545943	-0.421617	medium	0.837911	0.000161605	-0.479158	medium	0.797656	0.000161605	-0.611102	large	0.922932	0.132297	-0.184809	small	0.878592	0.132297	-0.317674	medium	0.870525	0.0398687	-0.247628	small
AA	Leu+Ile	167.586	188.208	195.779	209.222	230.458	227.844	172.597	162.293	186.385	185.695	225.001	220.736	5.91376e-05	0.00032693	0.127473	medium	5.31792e-05	0.000128773	0.12889	medium	0.767097	1.31758e-06	-0.600642	large	0.781916	1.23316e-06	-0.602396	large	0.721298	0.000161989	-0.479079	medium	0.735233	0.000161989	-0.483519	medium	0.828373	0.00628712	-0.338233	medium	0.844377	0.00628712	-0.336433	medium	0.82531	0.0120989	-0.303326	medium
BA	ADMA	0.520145	0.496344	0.568654	0.523914	0.53923	0.513082	0.508659	0.520216	0.557904	0.504055	0.543424	0.508467	0.00799503	0.0180196	0.0604344	medium	0.0110551	0.0161152	0.055837	small	0.936027	0.0736573	-0.215189	small	1.00038	0.963533	-0.00547304	negligible	0.957294	0.0403965	-0.256287	small	1.02311	0.0403965	-0.0555282	negligible	1.02665	0.231374	0.146767	small	1.09723	0.231374	0.352031	medium	0.927554	0.160389	-0.168555	small
BA	Creatinine	67.7931	67.4174	61.3623	66.5088	67.7517	69.0241	67.1522	67.4254	59.4578	67.2383	68.5938	68.3484	0.134931	0.179704	0.0186307	small	0.17344	0.202247	0.0146042	small	0.978983	0.896923	0.0155084	negligible	0.982498	0.683532	0.0488111	negligible	0.982966	0.578035	-0.069135	negligible	0.986497	0.578035	-0.0312573	negligible	0.866809	0.0252733	-0.275873	small	0.869922	0.0252733	-0.240122	small	0.980238	0.620177	-0.0593494	negligible
BA	Kynurenine	2.12537	2.06243	2.14883	2.23911	2.17295	2.17262	2.06685	1.88654	2.03712	2.0839	2.09128	2.16316	0.814066	0.84582	-0.0149963	small	0.761208	0.782575	-0.0132004	small	0.98832	0.573317	-0.0674491	negligible	0.955477	0.446137	-0.0912836	negligible	0.902102	0.348127	-0.116712	small	0.872124	0.348127	-0.139349	small	0.974104	0.811078	-0.0292505	negligible	0.941733	0.811078	-0.0528808	negligible	0.996475	0.86963	0.0196482	negligible
BA	Met-SO	0.701777	1.00521	0.89927	1.01517	1.14254	3.20666	0.667077	0.789488	0.808002	0.933626	1.13966	1.60061	5.90669e-05	0.00032693	0.127489	medium	1.36621e-11	1.48259e-10	0.325893	large	0.58533	8.05035e-07	-0.613616	large	0.416765	1.85265e-15	-1.05291	large	0.692741	0.00756515	-0.33549	medium	0.493243	0.00756515	-0.747696	large	0.708986	0.00759146	-0.330297	medium	0.50481	0.00759146	-0.749716	large	0.819215	0.110734	-0.191676	small
BA	Putrescine	0.221314	0.190973	0.159846	0.180012	0.160861	0.117128	0.212487	0.191855	0.170859	0.193365	0.151879	0.115135	0.0578806	0.0936962	0.0316798	small	0.000108236	0.000245839	0.119389	medium	1.39905	0.00712622	0.325762	medium	1.84555	2.45103e-06	0.584025	large	1.26321	0.173325	0.169633	small	1.66635	0.173325	0.432091	medium	1.12496	0.860332	0.0215301	negligible	1.48399	0.860332	0.274077	small	1.27315	0.266362	0.133307	small
BA	Sarcosine	1.27527	0.965781	1.10787	1.55625	1.25898	1.71776	1.16708	0.945494	1.10811	1.48662	1.2712	1.37193	0.0866678	0.127516	0.0255404	small	0.0529993	0.0684088	0.0330029	small	0.918093	0.82587	-0.0263379	negligible	0.850678	0.431086	-0.0943403	negligible	0.743783	0.0542758	-0.240466	small	0.689168	0.0542758	-0.305398	medium	0.871705	0.496132	-0.0833351	negligible	0.807697	0.496132	-0.143301	small	1.16947	0.37401	0.106549	small
BA	SDMA	0.54316	0.586553	0.558409	0.52576	0.495549	0.511181	0.538288	0.563107	0.544612	0.519761	0.4962	0.504894	0.0912506	0.131707	0.0247467	small	0.197204	0.224828	0.0125071	small	1.08482	0.191511	0.156766	small	1.06614	0.363953	0.108816	small	1.13484	0.0199814	0.291475	small	1.1153	0.0199814	0.244259	small	1.09757	0.018545	0.290588	small	1.07867	0.018545	0.238632	small	1.04748	0.357054	0.110394	small
BA	Serotonin	0.555025	0.608547	0.649748	0.52998	0.46456	0.610387	0.555513	0.544027	0.596726	0.542275	0.442335	0.542616	0.0607841	0.0967921	0.0309423	small	0.581153	0.610315	-0.00702377	small	1.25586	0.0806822	0.210089	small	1.02377	0.990188	-0.00147208	negligible	1.2299	0.0958435	0.207771	small	1.0026	0.0958435	-0.00176126	negligible	1.34904	0.00293759	0.368955	medium	1.09972	0.00293759	0.154836	small	1.22594	0.146524	0.174374	small
BA	t4-OH-Pro	11.795	7.76006	9.98305	11.0684	13.8148	10.9671	9.66724	5.75906	8.71534	10.0164	12.3627	9.79607	5.81627e-05	0.00032693	0.127695	medium	0.0013583	0.00239748	0.0851036	medium	0.781969	0.0868037	-0.205933	small	0.986848	0.631393	-0.0574522	negligible	0.465842	6.33724e-07	-0.643251	large	0.587895	6.33724e-07	-0.496187	medium	0.704972	0.00625989	-0.338414	medium	0.889677	0.00625989	-0.190081	small	0.810209	0.0376242	-0.250536	small
BA	Taurine	134.393	130.502	143.287	127.871	147.582	132.783	134.303	135.007	145.925	130.028	144.151	131.757	0.0952207	0.135435	0.0240887	small	0.326612	0.35708	0.00393201	small	0.931686	0.162308	-0.16778	small	1.01933	0.647422	0.0547655	negligible	0.936571	0.0666706	-0.229008	small	1.02467	0.0666706	-0.00993681	negligible	1.01231	0.788674	-0.0327997	negligible	1.10753	0.788674	0.186145	small	0.90203	0.0196135	-0.281727	small
CE	CE(16:0)	271.054	217.395	236.198	226.461	252.178	252.605	289.716	248.009	236.563	211.406	251.065	247.044	0.0726093	0.109662	0.0282485	small	0.0833973	0.10354	0.0261313	small	1.15395	0.152694	0.171734	small	1.17273	0.250927	0.137717	small	0.987826	0.293444	-0.130735	small	1.00391	0.293444	-0.147657	small	0.942238	0.742452	-0.0402145	negligible	0.957576	0.742452	-0.067322	negligible	0.842038	0.23438	-0.142662	small
CE	CE(16:1)	277.08	203.681	292.081	226.878	240.896	307.824	241.9	171.231	234.313	191.763	225.797	309.183	0.0666597	0.10389	0.0295471	small	0.00171878	0.00301558	0.081866	medium	1.07131	0.199847	0.153854	small	0.782383	0.193625	-0.156019	small	0.75834	0.182121	-0.166207	small	0.553816	0.182121	-0.47123	medium	1.03771	0.364618	0.111071	small	0.757844	0.364618	-0.176106	small	0.849272	0.513454	-0.0782768	negligible
CE	CE(17:0)	9.33812	7.35726	8.16923	7.87396	7.33567	11.3129	8.82056	7.27506	7.10604	7.83108	7.56026	9.13329	0.0512451	0.0843528	0.033507	small	0.00927264	0.0137913	0.0583354	small	1.1667	0.00755088	0.323365	medium	0.965759	0.473583	-0.085858	negligible	0.962275	0.989095	-0.00169793	negligible	0.796543	0.989095	-0.382636	medium	0.93992	0.577464	0.0681976	negligible	0.778037	0.577464	-0.319515	medium	1.03582	0.376086	0.106085	small
CE	CE(17:1)	18.5356	15.0515	17.8756	16.2449	17.6914	32.4435	17.4201	13.0643	15.1219	15.9958	16.8798	33.1135	0.112978	0.156144	0.0214283	small	2.25989e-11	2.28326e-10	0.319458	large	1.03201	0.673367	0.0504743	negligible	0.526073	3.5723e-08	-0.691926	large	0.773961	0.0352999	-0.263287	small	0.394531	0.0352999	-0.998272	large	0.89586	0.771885	-0.0354775	negligible	0.45667	0.771885	-0.763146	large	0.947631	0.348847	-0.112298	small
CE	CE(17:2)	2.98462	2.35898	2.34175	2.52983	2.67956	4.99842	2.98149	1.97891	1.84526	2.23603	2.45302	5.03578	0.26829	0.326178	0.00734963	small	1.33324e-08	7.65961e-08	0.237466	large	1.21544	0.419809	0.0966717	negligible	0.592062	1.72735e-05	-0.529498	large	0.806723	0.479252	-0.087959	negligible	0.39297	0.479252	-0.725833	large	0.752238	0.170246	-0.168293	small	0.36643	0.170246	-0.792078	large	0.911542	0.831308	-0.0255024	negligible
CE	CE(18:1)	1132.69	839.882	1053.67	924.245	1092.59	857.858	993.353	773.342	918.892	864.408	901.33	926.175	0.337969	0.39769	0.00332607	small	0.241637	0.2692	0.00912578	small	1.1021	0.239311	0.141163	small	1.07253	0.0966082	0.199749	small	0.858	0.406963	-0.103124	small	0.834984	0.406963	-0.0580013	negligible	1.01948	0.649429	0.0556363	negligible	0.992137	0.649429	0.10715	small	0.959036	0.747958	-0.0384722	negligible
CE	CE(18:2)	6225.74	5063.24	5211.53	5683.08	6748.11	7194.63	6249.69	4945.42	5081.1	5338.97	6491.25	7245.18	0.000486431	0.00169672	0.0991227	medium	1.43128e-05	3.91931e-05	0.146327	large	0.962787	0.141013	-0.176805	small	0.862599	0.0186832	-0.283953	small	0.761859	0.000150003	-0.481619	medium	0.68258	0.000150003	-0.597362	large	0.782762	0.000171899	-0.469936	medium	0.701307	0.000171899	-0.57706	large	0.822488	0.00843392	-0.318748	medium
CE	CE(18:3)	386.713	218.941	246.866	261.332	304.254	285.806	369.633	223.485	232.873	241.947	282.469	266.072	2.92662e-05	0.000199419	0.136841	medium	9.98246e-05	0.000228505	0.120473	medium	1.30858	0.152721	0.171723	small	1.38922	0.0413984	0.245725	small	0.791184	0.00105885	-0.413609	medium	0.839942	0.00105885	-0.327657	medium	0.824419	0.0177872	-0.29253	small	0.875225	0.0177872	-0.210211	small	0.856543	0.0320006	-0.258538	small
CE	CE(19:2)	9.34424	7.59952	9.05926	10.4337	9.43967	8.43798	8.63401	5.49651	6.50128	8.96435	8.99266	8.60677	0.0951981	0.135435	0.0240924	small	0.135562	0.16016	0.0185567	small	0.960117	0.91445	0.0128601	negligible	1.00316	0.528752	0.0754515	negligible	0.611222	0.0306952	-0.270405	small	0.638626	0.0306952	-0.201549	small	0.722955	0.344874	-0.115737	small	0.755368	0.344874	-0.0488788	negligible	0.996852	0.810469	0.0287109	negligible
CE	CE(19:3)	3.63493	3.22605	3.76668	4.35382	3.47538	5.42607	3.40317	2.31453	2.40958	4.12349	3.42189	4.80301	0.570522	0.612319	-0.00663829	small	0.0112192	0.0162734	0.0556272	small	0.994531	0.923572	0.0114844	negligible	0.708549	0.00715251	-0.32561	medium	0.676389	0.590422	-0.0668916	negligible	0.481891	0.590422	-0.409418	medium	0.704166	0.990708	0.00142491	negligible	0.501681	0.990708	-0.329279	medium	1.20503	0.256701	0.136046	small
CE	CE(20:4)	1720.8	1418.7	1564.73	1557.29	1605.31	1135.92	1663.91	1453.68	1514.12	1411.57	1436.31	1142.69	0.280397	0.336706	0.00659224	small	1.69758e-05	4.52174e-05	0.144068	large	1.15847	0.301434	0.123906	small	1.45613	2.52373e-07	0.64348	large	1.0121	0.238209	-0.146838	small	1.27215	0.238209	0.354272	medium	1.05418	0.763843	-0.0367662	negligible	1.32505	0.763843	0.474768	medium	0.982774	0.648761	-0.0545423	negligible
CE	CE(20:5)	517.126	274.736	315.089	285.256	373.373	736.032	389.673	236.638	292.725	270.748	305.572	603.326	0.003197	0.00870304	0.0732788	medium	1.99885e-06	6.3659e-06	0.172264	large	1.27522	0.0542812	0.231714	small	0.645874	0.233654	-0.142885	small	0.774408	0.133143	-0.187219	small	0.392222	0.133143	-0.576538	large	0.957957	0.628011	-0.0593076	negligible	0.485186	0.628011	-0.444446	medium	0.886036	0.0854149	-0.206855	small
CE	CE(22:5)	36.5219	40.5646	39.9972	37.9649	42.8694	21.929	39.4812	38.2064	40.3703	38.16	40.5483	23.9282	0.720968	0.757145	-0.0118492	small	9.18727e-06	2.63909e-05	0.152189	large	0.973682	0.1997	-0.153905	small	1.64999	5.94603e-05	0.492858	medium	0.942245	0.732243	-0.0425109	negligible	1.59671	0.732243	0.582362	large	0.995611	0.638728	-0.057464	negligible	1.68715	0.638728	0.592505	large	0.941099	0.334385	-0.115723	small
CE	CE(22:6)	272.929	211.262	224.827	215.917	259.426	378.115	257.775	219.456	216.39	186.721	247.752	340.565	0.123563	0.167611	0.020022	small	2.13937e-05	5.54722e-05	0.141001	large	1.04045	0.307468	0.122364	small	0.756902	0.0234104	-0.273508	small	0.885788	0.25599	-0.141393	small	0.644387	0.25599	-0.544866	large	0.873414	0.497442	-0.0830815	negligible	0.635386	0.497442	-0.488072	medium	0.75366	0.179416	-0.161163	small
DG	DG(32:1)	3.30927	2.71407	3.9405	3.08223	5.19282	8.11658	2.81341	2.41465	2.95774	2.66962	4.40532	6.21485	0.00028335	0.00109239	0.106441	medium	1.21857e-08	7.14081e-08	0.238628	large	0.63864	0.000394745	-0.432568	medium	0.452692	3.752e-08	-0.690735	large	0.548122	3.17482e-05	-0.531006	large	0.38853	3.17482e-05	-0.794637	large	0.671402	0.0159464	-0.29757	small	0.475915	0.0159464	-0.557668	large	0.605999	0.000227705	-0.450696	medium
DG	DG(32:2)	1.39671	1.13556	1.39479	1.22856	1.98136	3.52082	1.21816	0.994326	1.18722	1.17138	1.67588	3.15397	0.0136514	0.0283677	0.0528259	small	3.7008e-07	1.39017e-06	0.194324	large	0.72688	0.0115357	-0.305396	medium	0.386231	1.23521e-06	-0.602352	large	0.593317	0.00114458	-0.41073	medium	0.315261	0.00114458	-0.697708	large	0.708417	0.0223845	-0.281709	small	0.37642	0.0223845	-0.572123	large	0.698967	0.00652646	-0.329378	medium
DG	DG(34:1)	15.1704	14.4603	19.7546	15.874	22.8453	26.9925	13.4793	15.411	17.1259	14.4638	20.3018	24.3123	0.000213248	0.000880025	0.110275	medium	2.02949e-05	5.30928e-05	0.141701	large	0.663946	8.37387e-05	-0.482361	medium	0.554423	7.65843e-06	-0.552661	large	0.759097	0.000111989	-0.491186	medium	0.633878	0.000111989	-0.560297	large	0.843568	0.0590441	-0.232275	small	0.704414	0.0590441	-0.3084	medium	0.712439	0.000314935	-0.440077	medium
DG	DG(34:3)	2.71284	2.41076	2.62055	2.24773	4.22304	5.94063	2.80966	2.23322	2.42295	2.14161	3.63121	5.12567	4.49949e-05	0.000275245	0.131118	medium	1.37582e-08	7.7522e-08	0.237059	large	0.773753	0.000552098	-0.421235	medium	0.548155	4.6025e-07	-0.628125	large	0.615007	5.34964e-05	-0.514792	large	0.435694	5.34964e-05	-0.718725	large	0.667258	0.000296951	-0.451803	medium	0.47271	0.000296951	-0.651444	large	0.589778	2.55684e-06	-0.582882	large
DG	DG(36:2)	18.2921	16.5056	21.7466	19.8652	21.7805	17.9473	17.9566	17.7513	20.0692	18.9926	18.3805	16.0924	0.139886	0.183796	0.0180577	small	0.114258	0.138337	0.0212519	small	0.97694	0.271847	-0.131783	small	1.11585	0.542945	0.0728676	negligible	0.965767	0.0659303	-0.22964	small	1.10308	0.0659303	-0.0186592	negligible	1.09187	0.532269	0.0764644	negligible	1.24712	0.532269	0.280158	small	1.0333	0.570314	-0.0679786	negligible
DG	DG(36:3)	14.1285	13.6441	14.1746	15.4627	18.8952	17.6134	14.0485	13.1722	13.3817	13.0985	15.7977	15.669	0.11081	0.153874	0.0217313	small	0.231666	0.26007	0.00983395	small	0.889275	0.0250415	-0.270333	small	0.896578	0.0520072	-0.233966	small	0.833804	0.0273213	-0.276233	small	0.840651	0.0273213	-0.238256	small	0.847067	0.0272865	-0.272142	small	0.854023	0.0272865	-0.229727	small	0.829139	0.0795441	-0.21089	small
DG	DG(36:4)	5.15546	4.8122	4.45469	5.66802	7.62187	7.24648	5.08976	4.66471	3.83531	4.31033	6.13055	5.96875	0.00176144	0.00532065	0.0815281	medium	0.00295588	0.0048352	0.0743682	medium	0.830228	0.00743557	-0.324003	medium	0.852735	0.0119929	-0.303708	medium	0.760896	0.00199687	-0.389691	medium	0.781523	0.00199687	-0.371698	medium	0.625607	9.32207e-05	-0.489646	medium	0.642566	9.32207e-05	-0.473493	medium	0.70309	0.00318032	-0.357914	medium
DG	DG(38:5)	1.63438	1.60896	1.68201	1.79911	2.05329	1.57494	1.64427	1.60198	1.30136	1.64248	1.92025	1.45966	0.402819	0.452206	0.000145801	small	0.988428	0.988428	-0.0227107	small	0.856279	0.131625	-0.181122	small	1.12647	0.725312	0.0420694	negligible	0.834258	0.0819356	-0.217115	small	1.0975	0.0819356	-0.00354394	negligible	0.677707	0.133787	-0.184095	small	0.891554	0.133787	0.0407138	negligible	0.855351	0.163667	-0.167235	small
DG	DG(39:0)	4.35708	3.04385	2.91079	2.76452	3.36643	6.80855	2.78187	2.54516	3.1212	2.69709	2.67866	4.86055	0.376908	0.431383	0.00136488	small	0.00218585	0.00368077	0.0785489	medium	1.03853	0.295834	0.125355	small	0.572337	0.0896848	-0.20406	small	0.950161	0.64057	-0.0580211	negligible	0.523635	0.64057	-0.392589	medium	1.16521	0.685112	-0.0496284	negligible	0.64215	0.685112	-0.388205	medium	1.00688	0.394707	-0.101999	small
DG	DG(41:1)	2.67862	2.74643	2.52428	2.1487	2.71304	4.21359	2.37656	2.25237	2.71019	2.09898	2.35677	3.93701	0.508608	0.551934	-0.00430836	small	0.000561108	0.00109603	0.0971823	medium	1.0084	0.73586	-0.0403893	negligible	0.603647	0.00257488	-0.365979	medium	0.955701	0.387032	-0.107582	small	0.572101	0.387032	-0.425194	medium	1.14996	0.734929	-0.0414349	negligible	0.688388	0.734929	-0.372688	medium	0.890616	0.102376	-0.196345	small
DG	DG(42:0)	2.47741	1.71963	2.26499	2.00606	2.45245	2.50022	2.31155	1.94571	2.24682	2.04045	2.39626	2.55353	0.0144423	0.029386	0.0520193	small	0.0229853	0.0310355	0.0453162	small	0.964647	0.718935	-0.0430892	negligible	0.905236	0.887514	-0.0169332	negligible	0.811975	0.00245519	-0.381662	medium	0.761967	0.00245519	-0.355196	medium	0.937633	0.219716	-0.150519	small	0.879886	0.219716	-0.127107	small	0.851512	0.0260009	-0.268549	small
DG	DG(42:1)	7.62745	6.09958	6.31073	6.77714	8.57544	8.7563	7.14554	5.72864	6.38144	6.47312	8.56045	8.74689	5.73686e-06	5.25282e-05	0.158402	large	4.30973e-06	1.28852e-05	0.162169	large	0.834715	0.0254543	-0.269558	small	0.816924	0.0197274	-0.281461	small	0.669199	1.76556e-06	-0.615225	large	0.654935	1.76556e-06	-0.625939	large	0.745456	3.63138e-06	-0.586031	large	0.729567	3.63138e-06	-0.592325	large	0.756165	0.000127548	-0.469231	medium
DG	DG(42:2)	1.03371	1.15818	0.815956	0.901126	1.10143	3.95813	0.882103	0.834543	0.777674	0.723255	0.9551	1.11741	0.0730331	0.109737	0.0281598	small	0.017865	0.0248078	0.0489623	small	0.923572	0.414885	-0.0977013	negligible	0.789416	0.13806	-0.178139	small	0.873775	0.211822	-0.15548	small	0.746853	0.211822	-0.231881	small	0.814233	0.01507	-0.300154	medium	0.69596	0.01507	-0.374193	medium	0.757256	0.0183752	-0.284712	small
DG	DG(44:3)	3.61529	2.80963	2.93742	3.20739	3.70516	2.48392	3.40341	2.55849	2.81552	3.11258	3.2313	2.42927	0.00888318	0.0192798	0.0589437	small	0.000212237	0.000467561	0.110339	medium	1.05326	0.69527	0.0469022	negligible	1.401	7.86415e-06	0.551917	large	0.791783	0.00576165	-0.34708	medium	1.05319	0.00576165	0.131064	small	0.871328	0.0416993	-0.250791	small	1.159	0.0416993	0.241984	small	0.963259	0.203566	-0.152584	small
DG	DG-O(32:2)	2.2272	1.78843	2.04761	1.77892	2.95971	3.16931	2.19632	1.57229	1.81823	1.43683	2.63905	2.88443	0.00137148	0.00422995	0.0849709	medium	0.000761955	0.00143111	0.0930155	medium	0.832242	0.047727	-0.23844	small	0.761443	0.0261118	-0.268346	small	0.595778	0.000556234	-0.436872	medium	0.545095	0.000556234	-0.46123	medium	0.688972	0.00803245	-0.327893	medium	0.630361	0.00803245	-0.348423	medium	0.544452	0.000131651	-0.468232	medium
DG	DG-O(34:1)	12.5607	11.5629	14.024	14.4138	15.4867	12.3142	11.6953	10.6698	12.4454	12.8482	13.4199	11.1241	0.247111	0.305499	0.00874771	small	0.277121	0.306401	0.00679441	small	0.871489	0.188419	-0.15787	small	1.05134	0.740044	0.0397251	negligible	0.795076	0.0610265	-0.233983	small	0.95916	0.0610265	-0.0360605	negligible	0.927386	0.727907	-0.0425777	negligible	1.11878	0.727907	0.158806	small	0.957405	0.934802	-0.00979268	negligible
DG	DG-O(36:4)	4.8807	3.89406	4.17391	4.72628	5.26956	5.15817	4.81395	3.96779	4.12108	4.55452	5.32348	4.99362	9.09016e-05	0.000467266	0.121726	medium	0.0010342	0.00188212	0.0888412	medium	0.904286	0.0781928	-0.211853	small	0.964021	0.256209	-0.136187	small	0.745338	7.5595e-06	-0.573902	large	0.794573	7.5595e-06	-0.487946	medium	0.774133	0.000122935	-0.480807	medium	0.82527	0.000122935	-0.39473	medium	0.855552	0.0138847	-0.297288	small
TG	TG(44:1)	4.33308	1.74224	2.54569	2.90084	7.40138	6.81119	1.44689	0.338974	0.341611	2.52948	4.07354	6.02895	0.0534224	0.0874456	0.0328837	small	0.265212	0.294345	0.00754683	small	0.355193	0.0454657	-0.240943	small	0.239991	0.182159	-0.160147	small	0.0832135	0.00699954	-0.338827	medium	0.0562243	0.00699954	-0.254539	small	0.0838609	0.0118468	-0.310978	medium	0.0566617	0.0118468	-0.228101	small	0.620955	0.0549891	-0.231029	small
TG	TG(44:2)	1.8612	1.29254	1.43811	1.78349	3.38949	3.96232	1.20065	1.1008	1.12219	1.47796	2.38357	3.33648	0.000655269	0.00218175	0.0950714	medium	3.84089e-07	1.42453e-06	0.193839	large	0.503719	0.00147407	-0.386671	medium	0.359856	2.27413e-06	-0.586047	large	0.461829	6.43241e-05	-0.508976	large	0.329929	6.43241e-05	-0.705919	large	0.4708	0.000320044	-0.449278	medium	0.336338	0.000320044	-0.647959	large	0.620059	0.00778951	-0.322071	medium
TG	TG(46:2)	5.38106	2.35923	3.9479	4.01343	10.95	11.4135	3.22272	1.26872	2.04207	3.55497	8.18438	10.1274	1.23951e-06	1.65081e-05	0.178528	large	2.4596e-05	6.26662e-05	0.13915	medium	0.393765	0.000822508	-0.407468	medium	0.318218	0.00559709	-0.335627	medium	0.155018	9.7488e-09	-0.750282	large	0.125276	9.7488e-09	-0.665402	large	0.249508	1.77175e-05	-0.540473	large	0.201638	1.77175e-05	-0.456372	medium	0.43436	0.000174375	-0.459298	medium
TG	TG(48:1)	43.7143	24.5028	41.8074	37.9985	53.3727	57.3838	34.9297	22.7201	29.4408	36.9465	43.3101	49.2279	0.000241084	0.00096764	0.108621	medium	4.73199e-05	0.00011651	0.130446	medium	0.806502	0.0892427	-0.204344	small	0.709551	0.0278945	-0.26519	small	0.524591	2.85294e-06	-0.601803	large	0.461529	2.85294e-06	-0.660221	large	0.679767	0.0370678	-0.256844	small	0.598051	0.0370678	-0.316506	medium	0.853069	0.0147964	-0.294468	small
TG	TG(48:2)	33.106	16.5779	28.3663	25.7894	39.7637	44.596	25.9967	13.5962	19.2209	24.7407	28.2026	36.6031	0.000103819	0.000515576	0.119947	medium	2.22951e-06	7.02416e-06	0.170831	large	0.921783	0.0911349	-0.203135	small	0.71023	0.00701607	-0.326405	medium	0.482092	1.14495e-06	-0.627173	large	0.37145	1.14495e-06	-0.7531	large	0.681529	0.0184143	-0.290917	small	0.525115	0.0184143	-0.413249	medium	0.877251	0.00882774	-0.316828	medium
TG	TG(48:3)	10.3943	3.37961	7.83086	7.06292	12.3011	17.8979	0.384233	0.332644	1.99817	0.367622	2.58129	16.7473	0.0173594	0.0343668	0.049376	small	0.000243877	0.000518213	0.108466	medium	0.148853	0.306053	-0.122724	small	0.022943	0.0144955	-0.295381	small	0.128867	0.000972685	-0.416731	medium	0.0198626	0.000972685	-0.59026	large	0.774099	0.36933	-0.109982	small	0.119314	0.36933	-0.288501	small	0.142418	0.0613966	-0.225146	small
TG	TG(49:1)	7.79978	4.80361	7.45595	7.06036	8.36027	11.5751	6.38851	4.42317	5.44542	6.82671	6.4608	10.5041	0.0219455	0.0416076	0.045988	small	4.07695e-06	1.23149e-05	0.162899	large	0.98881	0.34018	-0.114339	small	0.608193	0.000707941	-0.412688	medium	0.684617	0.000921645	-0.418705	medium	0.421091	0.000921645	-0.727952	large	0.842839	0.197426	-0.158116	small	0.51841	0.197426	-0.455794	medium	1.05664	0.21488	-0.148822	small
TG	TG(49:2)	5.57569	3.24627	5.06142	4.71811	6.24676	9.4878	4.55541	2.64907	3.31206	4.86122	5.2351	7.92721	0.00322071	0.00870304	0.0731761	medium	6.88819e-09	4.58691e-08	0.245996	large	0.870165	0.206474	-0.151603	small	0.574654	1.28834e-05	-0.537929	large	0.506021	7.96747e-05	-0.502163	large	0.334174	7.96747e-05	-0.905822	large	0.632664	0.0592117	-0.23212	small	0.417809	0.0592117	-0.623842	large	0.928582	0.11163	-0.191192	small
TG	TG(50:1)	103.299	81.5833	117.91	96.9594	133.278	104.137	88.4692	77.0687	88.1232	76.7498	104.305	81.208	0.0564353	0.0918641	0.0320601	small	0.181199	0.208201	0.0138926	small	0.848175	0.177548	-0.161862	small	1.08942	0.720473	0.042843	negligible	0.738876	0.00805182	-0.332795	medium	0.949029	0.00805182	-0.130571	small	0.844858	0.720939	-0.0437155	negligible	1.08515	0.720939	0.179002	small	0.735818	0.0592832	-0.227027	small
TG	TG(50:2)	147.719	106.743	161.955	128.209	170.608	154.127	132.192	97.8307	133.069	124.206	134.068	126.299	0.0237536	0.0443299	0.0448385	small	0.0350334	0.0460305	0.0391528	small	0.986008	0.606582	-0.0616696	negligible	1.04666	0.975896	-0.00361688	negligible	0.729711	0.00476376	-0.355007	medium	0.774598	0.00476376	-0.301164	medium	0.99255	0.941773	0.00893728	negligible	1.05361	0.941773	0.0684353	negligible	0.926445	0.132359	-0.180777	small
TG	TG(50:3)	70.8265	46.3492	63.7995	56.8157	82.6121	84.9001	65.7662	41.1448	53.1569	61.3367	69.0911	75.8815	0.000804332	0.00261855	0.092277	medium	0.000219705	0.000480399	0.109873	medium	0.951876	0.205444	-0.151949	small	0.866696	0.0975809	-0.199164	small	0.595514	3.57343e-05	-0.527362	large	0.542224	3.57343e-05	-0.574074	large	0.769373	0.03757	-0.256158	small	0.700525	0.03757	-0.301242	medium	0.887766	0.00376753	-0.351344	medium
TG	TG(50:4)	22.8782	14.9316	18.2547	19.3963	27.7503	28.7493	21.9183	13.704	15.6211	17.4402	23.5859	24.3523	8.07279e-06	6.95684e-05	0.153897	large	1.61732e-06	5.32444e-06	0.175042	large	0.929294	0.0913564	-0.202995	small	0.90005	0.0384162	-0.249493	small	0.581024	5.87533e-07	-0.645289	large	0.56274	5.87533e-07	-0.693723	large	0.662304	0.000106289	-0.48547	medium	0.641462	0.000106289	-0.536141	large	0.739431	0.000337482	-0.437788	medium
TG	TG(51:1)	5.0112	2.76877	5.26895	5.13782	6.07545	7.90504	3.68798	2.65515	3.86869	4.68873	3.63508	6.10722	0.0706169	0.107764	0.0286718	small	0.00427337	0.00666009	0.0692352	medium	1.01455	0.880568	0.0179866	negligible	0.603871	0.0388175	-0.248972	small	0.730426	0.0876848	-0.213107	small	0.434757	0.0876848	-0.48568	medium	1.06427	0.390835	0.105116	small	0.633461	0.390835	-0.168396	small	1.28986	0.314834	0.12051	small
TG	TG(51:2)	14.5828	9.9274	14.7001	13.5726	16.1451	19.2202	13.4996	8.9637	11.6142	13.6764	14.1471	16.4283	0.01725	0.0343668	0.049467	small	7.98549e-05	0.000190224	0.12346	medium	0.954234	0.430076	-0.0945476	negligible	0.82173	0.00909497	-0.315569	medium	0.633607	0.000993731	-0.415945	medium	0.545624	0.000993731	-0.647831	large	0.820962	0.441624	-0.0942352	negligible	0.706963	0.441624	-0.321951	medium	0.966727	0.361407	-0.109396	small
TG	TG(51:3)	8.77517	6.36381	7.81554	8.23038	10.4031	13.2386	7.94356	5.90281	6.56585	8.20533	9.49594	10.7881	0.00864665	0.0189065	0.0593259	small	2.33238e-07	9.36148e-07	0.20034	large	0.836522	0.174609	-0.162972	small	0.736324	9.82238e-05	-0.477414	medium	0.621614	0.000399965	-0.448441	medium	0.547157	0.000399965	-0.776861	large	0.691437	0.0153408	-0.299342	small	0.608617	0.0153408	-0.621666	large	0.864088	0.115438	-0.18917	small
TG	TG(51:4)	3.50689	2.34608	2.65114	3.05882	4.16694	5.19925	3.66505	2.21452	2.20173	2.67496	4.01844	4.67427	0.000171867	0.000748432	0.11318	medium	1.03283e-08	6.30455e-08	0.240765	large	0.912058	0.317497	-0.119847	small	0.78409	0.00128535	-0.391628	medium	0.55109	4.58518e-05	-0.519621	large	0.473768	4.58518e-05	-0.809671	large	0.547908	0.000326222	-0.448631	medium	0.471032	0.000326222	-0.7405	large	0.66567	0.0122587	-0.302754	medium
TG	TG(51:5)	1.25059	0.711744	0.659068	0.902703	1.23623	1.84326	1.31998	0.14238	0.0965132	0.888187	0.99666	1.85818	0.0595538	0.095875	0.0312506	small	5.69985e-07	1.98816e-06	0.188687	large	1.3244	0.388901	0.10326	small	0.710362	0.00835288	-0.319153	medium	0.142857	0.163337	-0.173685	small	0.0766235	0.163337	-0.631672	large	0.0968367	0.0840722	-0.212357	small	0.0519397	0.0840722	-0.669542	large	0.891164	0.255888	-0.136279	small
TG	TG(52:2)	353.863	308.515	414.959	368.92	403.232	283.821	341.113	276.597	354.545	353.285	338.19	239.242	0.274786	0.332213	0.00693973	small	0.00954594	0.0141261	0.0579234	small	1.00864	0.565766	-0.0687829	negligible	1.42581	0.0272301	0.266345	small	0.817876	0.127473	-0.190021	small	1.15614	0.127473	0.146536	small	1.04836	0.472777	0.0879193	negligible	1.48195	0.472777	0.426628	medium	1.04464	0.760679	-0.0364668	negligible
TG	TG(52:3)	315.973	277.844	319.065	317.972	383.008	296.724	303.838	263.949	295.707	297.721	333.493	269.323	0.254604	0.31213	0.00824168	small	0.628527	0.655368	-0.00870132	small	0.911075	0.167191	-0.16584	small	1.12815	0.41787	0.0970761	negligible	0.791466	0.0229501	-0.284799	small	0.980045	0.0229501	-0.0266902	negligible	0.886695	0.22688	-0.148197	small	1.09796	0.22688	0.121949	small	0.892734	0.228501	-0.144479	small
TG	TG(52:4)	130.349	104.867	109.201	122.882	165.787	138.332	119.99	100.306	91.6885	105.31	150.799	126.332	0.00524171	0.0127985	0.0663771	medium	0.126023	0.150713	0.0197113	small	0.795695	0.106763	-0.193858	small	0.949796	0.714096	-0.0438652	negligible	0.665163	0.000930015	-0.418374	medium	0.793984	0.000930015	-0.266477	small	0.608018	0.00145836	-0.395631	medium	0.725772	0.00145836	-0.241548	small	0.698347	0.0111174	-0.306992	medium
TG	TG(52:5)	35.7165	22.7844	24.8455	28.3565	44.2231	37.8979	33.2871	19.3282	19.269	20.2928	39.3673	32.6894	1.14744e-05	9.60574e-05	0.149252	large	0.000150277	0.000336117	0.114984	medium	0.845552	0.190979	-0.156955	small	1.01828	0.66329	-0.052133	negligible	0.490972	7.42223e-06	-0.574435	large	0.591268	7.42223e-06	-0.47506	medium	0.489468	5.66735e-05	-0.505262	large	0.589457	5.66735e-05	-0.410498	medium	0.515473	0.000157554	-0.462537	medium
TG	TG(52:6)	6.02868	3.55148	4.04074	5.16272	8.20319	10.5224	4.80866	3.23421	3.58818	3.57776	6.66834	7.71711	3.14381e-05	0.000209349	0.13589	medium	1.99231e-08	1.06136e-07	0.232271	large	0.721117	0.109609	-0.192287	small	0.623116	0.00122008	-0.393502	medium	0.48501	4.83275e-06	-0.586825	large	0.419096	4.83275e-06	-0.796494	large	0.538092	0.000100609	-0.487221	medium	0.464965	0.000100609	-0.698411	large	0.53653	0.000666598	-0.414768	medium
TG	TG(52:7)	2.44385	1.97265	1.56637	2.00956	3.22319	3.69986	2.49607	2.22484	1.705	1.9338	3.07682	3.53892	2.43415e-05	0.000173664	0.139288	medium	5.9107e-08	2.70599e-07	0.218182	large	0.811249	0.0450715	-0.24139	small	0.70532	0.000743438	-0.410991	medium	0.723095	0.00135035	-0.404565	medium	0.628676	0.00135035	-0.576791	large	0.554142	1.06819e-06	-0.619613	large	0.481784	1.06819e-06	-0.78956	large	0.628505	8.97004e-05	-0.480233	medium
TG	TG(53:3)	8.68954	6.28716	8.19485	8.9951	10.9237	12.3917	8.35263	6.31418	6.69391	8.45071	9.45207	11.5643	0.00502207	0.0124693	0.0669769	medium	6.87837e-06	1.99541e-05	0.156009	large	0.883682	0.102869	-0.196061	small	0.722276	0.00086129	-0.405854	medium	0.668021	0.000143142	-0.48316	medium	0.546006	0.000143142	-0.70301	large	0.708195	0.0250398	-0.276323	small	0.578842	0.0250398	-0.495454	medium	0.894059	0.139006	-0.177709	small
TG	TG(53:4)	4.65431	3.24946	3.67137	4.16959	5.70387	6.94251	4.41809	2.97083	3.06039	3.36154	4.97124	5.76622	0.0001583	0.000702756	0.114286	medium	1.49538e-07	6.25923e-07	0.206125	large	0.88873	0.107055	-0.193695	small	0.766202	0.00153025	-0.38531	medium	0.597604	1.73726e-05	-0.549315	large	0.515213	1.73726e-05	-0.751805	large	0.61562	0.000214079	-0.46272	medium	0.530745	0.000214079	-0.665531	large	0.676197	0.00453288	-0.344067	medium
TG	TG(53:5)	2.2398	1.61732	1.73012	2.01866	2.6957	3.30421	2.22908	1.69318	1.53881	1.80258	2.50456	3.39483	0.000308617	0.00115461	0.105287	medium	3.35072e-07	1.27501e-06	0.195619	large	0.890007	0.126981	-0.183348	small	0.656609	0.00106769	-0.398268	medium	0.676037	0.000104281	-0.4935	medium	0.498751	0.000104281	-0.697777	large	0.614401	9.53817e-05	-0.488919	medium	0.453279	9.53817e-05	-0.692886	large	0.719721	0.0107102	-0.308599	medium
TG	TG(53:6)	0.855984	0.39289	0.327795	0.470557	0.982915	1.87455	0.206572	0.0402724	0.042945	0.0448735	0.606421	2.05061	0.0137866	0.028447	0.0526848	small	4.80207e-09	3.31025e-08	0.250652	large	0.340642	0.598044	-0.0631388	negligible	0.100737	4.09631e-05	-0.504102	large	0.06641	0.00542369	-0.349614	medium	0.0196392	0.00542369	-0.802404	large	0.0708172	0.00748282	-0.330909	medium	0.0209425	0.00748282	-0.780487	large	0.0739973	0.0516353	-0.234342	small
TG	TG(54:2)	0.896427	0.529137	0.878701	10.7025	1.29463	3.53662	0.538755	0.501974	0.633107	0.649937	0.580612	0.597092	0.0139314	0.0285449	0.0525351	small	0.0173589	0.0242197	0.0493764	small	0.927908	0.937349	0.00940935	negligible	0.902297	0.242186	-0.1403	small	0.86456	0.495993	-0.084635	negligible	0.840697	0.495993	-0.239082	small	1.09041	0.35799	0.112619	small	1.06032	0.35799	-0.0376034	negligible	1.1194	0.00773813	0.322346	medium
TG	TG(54:3)	92.8302	84.4932	109.117	132.116	149.49	84.2328	98.1752	76.948	103.798	103.792	102.871	75.5828	0.0332166	0.0586294	0.0399365	small	0.0202779	0.0277636	0.0471328	small	0.954356	0.0688574	-0.21891	small	1.29891	0.242739	0.140134	small	0.748008	0.00533007	-0.350341	medium	1.01806	0.00533007	0.00885189	negligible	1.00902	0.567001	-0.0700824	negligible	1.37331	0.567001	0.299055	small	1.00896	0.728185	-0.0416111	negligible
TG	TG(54:4)	84.0648	80.271	85.2445	112.51	130.526	83.4455	81.8796	75.7607	77.1709	92.8117	99.8412	75.9623	0.0175436	0.0344051	0.0492239	small	0.180923	0.208201	0.0139174	small	0.820098	0.0207807	-0.279062	small	1.0779	0.629806	0.0577198	negligible	0.758812	0.00396126	-0.362571	medium	0.997346	0.00396126	-0.0285272	negligible	0.772936	0.0179852	-0.292015	small	1.01591	0.0179852	0.055572	negligible	0.929593	0.472588	-0.0860516	negligible
TG	TG(54:5)	61.9884	55.0977	54.6538	73.3503	91.2912	58.0746	60.1265	52.6442	48.5423	52.8915	72.7765	53.4927	0.00443918	0.0114095	0.0687033	medium	0.492785	0.523138	-0.00368539	small	0.82618	0.0255325	-0.269413	small	1.12401	0.371771	0.10705	small	0.723368	0.00110059	-0.412181	medium	0.984138	0.00110059	-0.0321473	negligible	0.667005	0.000493105	-0.43449	medium	0.907456	0.000493105	-0.0497612	negligible	0.726766	0.0443951	-0.242165	small
TG	TG(54:6)	35.7454	27.5859	27.206	33.7998	47.5054	36.9053	33.0698	28.6469	25.7951	24.3063	38.525	36.4054	0.00243897	0.00687133	0.0770332	medium	0.0306653	0.0408405	0.04111	small	0.858398	0.214812	-0.148844	small	0.908376	0.824484	-0.0265508	negligible	0.743593	0.00209037	-0.387923	medium	0.786886	0.00209037	-0.270187	small	0.669569	0.000549388	-0.430734	medium	0.708552	0.000549388	-0.313619	medium	0.630923	0.00485242	-0.341358	medium
TG	TG(54:7)	9.54045	5.97432	6.0168	6.04866	13.2742	11.4239	8.6071	4.99562	5.30749	4.51259	8.95254	8.73723	0.000259746	0.00101474	0.107615	medium	0.00090183	0.00166186	0.0907144	medium	0.961414	0.324085	-0.118221	small	0.985106	0.50128	-0.0805569	negligible	0.558011	0.000792642	-0.42419	medium	0.571763	0.000792642	-0.377753	medium	0.592847	0.00147622	-0.395179	medium	0.607457	0.00147622	-0.354414	medium	0.504057	0.000118169	-0.471634	medium
TG	TG(55:6)	1.91281	1.1851	1.47164	1.66407	1.99894	2.53109	1.90597	1.22333	1.54431	1.66935	1.92923	2.44139	0.00202272	0.00575395	0.0796203	medium	1.2971e-06	4.31877e-06	0.177933	large	0.987946	0.863156	0.0206334	negligible	0.780691	0.033839	-0.255797	small	0.634105	0.000741619	-0.426593	medium	0.50108	0.000741619	-0.717359	large	0.800481	0.033681	-0.261697	small	0.632553	0.033681	-0.551	large	0.865292	0.38091	-0.105015	small
TG	TG(55:7)	0.948951	0.65205	0.865339	0.66812	1.20704	2.27062	0.099839	0.0942119	0.0983168	0.0865971	0.864917	2.23486	0.43179	0.481044	-0.00114932	small	2.82807e-07	1.10483e-06	0.19783	large	0.115432	0.784263	0.0327758	negligible	0.0446734	4.05909e-05	-0.504375	large	0.108926	0.372207	-0.11099	small	0.0421555	0.372207	-0.658339	large	0.113672	0.778094	-0.0344852	negligible	0.0439923	0.778094	-0.570005	large	0.100122	0.155237	-0.17067	small
TG	TG(56:6)	14.4079	12.2539	13.5055	13.5103	13.713	11.2422	14.7287	12.1573	13.0765	11.7041	13.1494	11.7415	0.583697	0.621902	-0.00711547	small	0.122946	0.147636	0.0201009	small	1.1201	0.438945	0.0927366	negligible	1.25441	0.0110087	0.307416	medium	0.924551	0.408731	-0.102735	small	1.03541	0.408731	0.116155	small	0.994458	0.99161	0.00128672	negligible	1.1137	0.99161	0.225523	small	0.890083	0.647462	-0.0547588	negligible
TG	TG(56:7)	26.001	20.9073	22.462	21.1955	25.832	30.6709	23.1457	19.4116	21.61	17.0658	23.3075	30.2305	0.150249	0.194792	0.0169171	small	0.0155274	0.021768	0.0509799	small	0.993056	0.594408	0.0637674	negligible	0.76564	0.331327	-0.116459	small	0.832849	0.175307	-0.168849	small	0.642121	0.175307	-0.335138	medium	0.927169	0.636465	-0.0578521	negligible	0.714841	0.636465	-0.240647	small	0.732201	0.0919426	-0.202625	small
TG	TG(56:8)	9.19943	7.90713	5.47589	7.24101	13.7195	19.9756	4.61026	3.57143	3.15381	5.12153	7.72226	20.8538	0.134331	0.179704	0.0187014	small	5.25058e-05	0.000128202	0.12906	medium	0.59701	0.13956	-0.177458	small	0.221075	0.000275492	-0.44448	medium	0.462486	0.0793952	-0.21896	small	0.17126	0.0793952	-0.488564	medium	0.408405	0.0123768	-0.30903	medium	0.151234	0.0123768	-0.577202	large	0.663217	0.0596802	-0.226669	small
TG	TG(56:9)	2.57359	1.67138	1.72205	1.77983	2.90115	3.21994	2.32997	1.43787	1.48505	1.40503	2.39164	2.61007	0.00191148	0.00554518	0.080401	medium	0.00371397	0.00588212	0.0711926	medium	0.974212	0.688127	-0.0480624	negligible	0.892684	0.641265	-0.0557941	negligible	0.601205	0.00492063	-0.353666	medium	0.550893	0.00492063	-0.336371	medium	0.620934	0.0073455	-0.331694	medium	0.56897	0.0073455	-0.319815	medium	0.587474	0.00153844	-0.385115	medium
LPC	LPC(14:0)	0.755257	0.545489	0.676995	0.863439	1.21008	1.32574	0.663635	0.415844	0.55338	0.775851	1.22953	1.5272	0.000247088	0.000978335	0.108289	medium	0.0214606	0.0292463	0.0463119	small	0.539748	0.00126009	-0.392342	medium	0.434544	0.0402311	-0.247172	small	0.338214	9.36728e-06	-0.567637	large	0.272292	9.36728e-06	-0.39922	medium	0.450075	0.00115918	-0.40409	medium	0.362349	0.00115918	-0.244308	small	0.631015	0.0402328	-0.247169	small
LPC	LPC(15:0)	0.445133	0.357694	0.442202	0.45434	0.60231	1.07674	0.422822	0.328042	0.338804	0.392136	0.61591	1.01209	5.09219e-05	0.000304492	0.129468	medium	3.12584e-15	8.3261e-14	0.432564	large	0.686499	0.00427098	-0.346421	medium	0.417771	3.90187e-13	-0.944839	large	0.532613	1.78893e-06	-0.61486	large	0.324123	1.78893e-06	-1.22627	large	0.550086	6.91675e-05	-0.499053	medium	0.334756	6.91675e-05	-1.10134	large	0.636677	0.00137593	-0.38917	medium
LPC	LPC(16:0)	58.28	49.3368	64.196	59.2904	83.8253	111.091	57.2201	50.4117	58.0294	58.1401	80.8641	106.502	7.9064e-09	2.9977e-07	0.244217	large	3.96228e-15	9.67457e-14	0.429557	large	0.707608	3.63974e-07	-0.634151	large	0.537265	2.58107e-14	-1.00024	large	0.623413	3.5009e-11	-0.881996	large	0.473339	3.5009e-11	-1.26418	large	0.717617	4.73635e-06	-0.578568	large	0.544865	4.73635e-06	-0.932193	large	0.718986	4.21091e-07	-0.630413	large
LPC	LPC(16:1)	1.83922	1.31627	1.87061	1.73495	2.39363	4.00051	1.75296	1.14924	1.70378	1.66048	2.2491	3.84205	4.0419e-08	1.07662e-06	0.22311	large	4.81485e-16	2.35125e-14	0.456265	large	0.779402	0.000119477	-0.471288	medium	0.456256	3.83815e-13	-0.945179	large	0.510975	4.75278e-11	-0.875115	large	0.299121	4.75278e-11	-1.3858	large	0.757537	0.000653408	-0.424657	medium	0.443456	0.000653408	-0.919214	large	0.738287	1.05241e-05	-0.543691	large
LPC	LPC(17:0)	1.05486	0.869156	1.11022	1.13877	1.47327	2.89396	1.035	0.852962	0.841946	1.09674	1.48301	2.81401	5.61329e-05	0.00032693	0.128169	medium	1.02307e-16	7.69517e-15	0.475868	large	0.697907	0.00148722	-0.386348	medium	0.367803	4.54774e-16	-1.08063	large	0.575157	1.1736e-06	-0.626495	large	0.303112	1.1736e-06	-1.34997	large	0.567728	0.000189302	-0.466774	medium	0.299198	0.000189302	-1.17073	large	0.739537	0.00536914	-0.337303	medium
LPC	LPC(17:1)	0.226991	0.183765	0.215651	0.224419	0.269433	0.592965	0.221853	0.205092	0.198127	0.204571	0.260117	0.552223	0.000218055	0.000887364	0.109975	medium	1.05054e-16	7.69517e-15	0.475533	large	0.852897	0.0108996	-0.307845	medium	0.401746	3.35399e-15	-1.04112	large	0.788459	7.15213e-06	-0.575513	large	0.371393	7.15213e-06	-1.32514	large	0.761683	0.000350679	-0.44618	medium	0.358781	0.000350679	-1.19048	large	0.786457	0.00305035	-0.359518	medium
LPC	LPC(18:0)	38.436	29.2798	38.3873	38.7192	56.0834	75.0713	36.5299	29.6604	32.5978	38.5639	50.7126	73.6552	6.92924e-09	2.9977e-07	0.24592	large	1.6926e-15	6.19913e-14	0.44034	large	0.720333	1.07812e-05	-0.543006	large	0.495959	4.41283e-13	-0.942298	large	0.584873	7.89276e-12	-0.915162	large	0.402693	7.89276e-12	-1.32815	large	0.642794	1.26832e-06	-0.614974	large	0.442573	1.26832e-06	-1.01238	large	0.760441	9.79448e-06	-0.545728	large
LPC	LPC(18:1)	26.1516	20.4319	26.4946	28.8652	34.4406	42.4228	23.5833	19.9487	25.4374	30.2448	32.6963	39.3309	2.208e-07	3.59413e-06	0.201054	large	1.17725e-12	1.81544e-11	0.357178	large	0.721283	3.71196e-05	-0.507045	large	0.599612	7.68598e-11	-0.832805	large	0.61012	8.26138e-10	-0.809451	large	0.507201	8.26138e-10	-1.1501	large	0.777991	0.000376224	-0.443787	medium	0.646754	0.000376224	-0.778016	large	0.925023	0.0106796	-0.308723	medium
LPC	LPC(18:2)	18.3094	14.5547	14.7946	24.1929	29.4264	32.1422	17.3642	13.1179	15.3103	23.0516	28.497	30.0758	1.5608e-10	2.28657e-08	0.294713	large	1.7818e-13	3.48045e-12	0.381219	large	0.609333	7.00923e-06	-0.555143	large	0.577347	4.66307e-09	-0.740285	large	0.460325	5.54464e-11	-0.871637	large	0.43616	5.54464e-11	-1.06801	large	0.537259	1.56376e-10	-0.835295	large	0.509056	1.56376e-10	-1.0303	large	0.808912	0.0198873	-0.281089	small
LPC	LPC(20:0)	0.0916791	0.0707154	0.102238	0.0919839	0.103812	0.212375	0.0690295	0.0572542	0.0604554	0.0610154	0.09595	0.211337	0.390471	0.442365	0.000719021	small	5.56229e-08	2.58691e-07	0.21897	large	0.719432	0.434261	-0.0936904	negligible	0.326632	5.23151e-07	-0.62482	large	0.596708	0.0469128	-0.248364	small	0.270914	0.0469128	-0.785461	large	0.630071	0.508206	-0.0810111	negligible	0.286062	0.508206	-0.603341	large	0.635908	0.412874	-0.0981237	negligible
LPC	LPC(20:1)	0.364123	0.294664	0.37484	0.345764	0.463052	0.839159	0.353432	0.302918	0.354531	0.344547	0.415065	0.790666	0.000136611	0.000656955	0.116265	medium	2.19552e-17	3.38716e-15	0.495328	large	0.851511	0.00652822	-0.329367	medium	0.447006	9.93246e-17	-1.11042	large	0.729809	1.8e-06	-0.614689	large	0.383118	1.8e-06	-1.42012	large	0.854158	0.0133483	-0.305646	medium	0.448396	0.0133483	-1.08213	large	0.830104	0.000987902	-0.401023	medium
LPC	LPC(20:3)	10.2228	7.58245	10.1944	10.6059	14.6661	17.2313	9.0937	8.20034	9.38487	10.3966	13.1987	16.7565	2.0465e-06	2.60706e-05	0.171955	large	9.06649e-09	5.65209e-08	0.242448	large	0.688985	0.000144601	-0.465264	medium	0.542697	8.55475e-07	-0.612025	large	0.621299	1.07939e-08	-0.747784	large	0.489382	1.07939e-08	-0.893263	large	0.711045	0.000188783	-0.466865	medium	0.560073	0.000188783	-0.613828	large	0.787696	0.00283349	-0.362341	medium
LPC	LPC(20:4)	13.7664	11.3614	14.5196	15.4152	19.7765	20.0573	12.804	11.0582	13.7917	15.6448	19.598	18.8051	2.69113e-07	4.05488e-06	0.198477	large	2.40446e-08	1.21467e-07	0.229837	large	0.653334	3.51708e-06	-0.57421	large	0.680882	3.97286e-07	-0.631907	large	0.56425	2.10136e-09	-0.787365	large	0.588041	2.10136e-09	-0.856549	large	0.70373	9.03485e-05	-0.490639	medium	0.733403	9.03485e-05	-0.544114	large	0.798287	0.00169879	-0.381487	medium
LPC	LPC(22:5)	0.227609	0.227247	0.223193	0.224544	0.304723	0.33695	0.205821	0.231698	0.231372	0.225285	0.29758	0.336768	0.00971477	0.0207768	0.0576745	small	0.000244073	0.000518213	0.108455	medium	0.691647	0.00250291	-0.367052	medium	0.611165	0.000111624	-0.473421	medium	0.778608	0.0068556	-0.339715	medium	0.688007	0.0068556	-0.451844	medium	0.77751	0.00460735	-0.351025	medium	0.687036	0.00460735	-0.461507	medium	0.757057	0.00258475	-0.365834	medium
LPC	LPC(22:6)	2.43803	1.95334	2.33373	2.68082	2.95186	4.0815	2.36927	1.87344	2.26405	2.50281	2.92517	3.96124	2.32924e-06	2.70281e-05	0.170257	large	1.28794e-12	1.88684e-11	0.356033	large	0.809959	0.00120057	-0.39408	medium	0.598114	3.9956e-10	-0.796351	large	0.640455	2.45932e-08	-0.727399	large	0.472944	2.45932e-08	-1.1303	large	0.773987	0.000270751	-0.454904	medium	0.57155	0.000270751	-0.859584	large	0.855611	0.0534215	-0.232556	small
LPC	LPC-O(16:1)	0.954472	0.82837	1.00741	0.964603	1.37273	1.65673	0.922498	0.791013	0.876491	0.893491	1.26258	1.56057	4.54301e-06	4.59001e-05	0.161475	large	4.43627e-11	4.06196e-10	0.310829	large	0.730647	5.20931e-05	-0.49687	medium	0.591128	8.75691e-10	-0.778688	large	0.626506	1.03673e-07	-0.69093	large	0.506873	1.03673e-07	-0.979997	large	0.694208	0.000134542	-0.477899	medium	0.561647	0.000134542	-0.749953	large	0.707672	3.53675e-05	-0.508485	large
LPC	LPC-O(18:0)	0.424969	0.326277	0.387254	0.407723	0.507285	0.74716	0.445824	0.279142	0.388237	0.394861	0.467023	0.624314	0.00950164	0.0204704	0.0579894	small	8.09514e-09	5.15625e-08	0.243912	large	0.954609	0.0842981	-0.207604	small	0.714103	1.21614e-06	-0.602764	large	0.597705	0.000424703	-0.446352	medium	0.447118	0.000424703	-0.841787	large	0.831302	0.0122086	-0.30964	medium	0.621862	0.0122086	-0.693627	large	0.845485	0.0210203	-0.278531	small
LPC	LPC-O(18:1)	0.864452	0.765161	0.990599	0.94285	1.36923	1.65406	0.874633	0.747792	0.842611	0.867216	1.24226	1.44966	3.33549e-08	9.77299e-07	0.225599	large	3.16857e-12	4.03648e-11	0.344553	large	0.704066	1.45394e-07	-0.657369	large	0.603336	5.84711e-12	-0.888242	large	0.601961	3.39181e-10	-0.830212	large	0.515839	3.39181e-10	-1.06911	large	0.678289	7.65666e-06	-0.564905	large	0.581247	7.65666e-06	-0.781514	large	0.698095	2.05796e-05	-0.524418	large
LPC	LPC-O(18:2)	0.279384	0.210696	0.284678	0.266203	0.353189	0.462335	0.280807	0.213844	0.280273	0.275107	0.347804	0.443003	6.11922e-05	0.000332024	0.127017	medium	6.7058e-13	1.09155e-11	0.364349	large	0.80737	0.00666068	-0.328543	medium	0.63387	2.50857e-10	-0.806731	large	0.614842	4.82598e-07	-0.650568	large	0.482715	4.82598e-07	-1.14937	large	0.805835	0.0171149	-0.294314	small	0.632665	0.0171149	-0.767317	large	0.790983	0.00190616	-0.37724	medium
PC	PC(24:0)	0.230543	0.226037	0.220954	0.215584	0.232093	0.288714	0.137009	0.130255	0.128085	0.130096	0.139151	0.143681	0.941966	0.95171	-0.0199167	small	0.694125	0.716122	-0.0109457	small	0.98461	0.850746	-0.0225262	negligible	0.953561	0.41278	-0.0981437	negligible	0.936074	0.613278	-0.0628087	negligible	0.906556	0.613278	-0.133596	small	0.920478	0.425202	-0.0976679	negligible	0.891452	0.425202	-0.166607	small	0.934931	0.656575	-0.0532438	negligible
PC	PC(25:0)	0.0932578	0.104196	0.0875439	0.100141	0.107571	0.377507	0.0941915	0.0996417	0.0751502	0.0897438	0.0956036	0.338534	0.026421	0.0483834	0.0432886	small	2.31205e-17	3.38716e-15	0.494674	large	0.985229	0.284394	-0.128374	small	0.278233	3.0419e-18	-1.17786	large	1.04224	0.62247	0.0611861	negligible	0.294333	0.62247	-0.973877	large	0.78606	0.0074891	-0.330874	medium	0.221987	0.0074891	-1.40373	large	0.938707	0.328277	-0.117198	small
PC	PC(29:0)	0.225814	0.166224	0.179775	0.181859	0.144479	0.277781	0.110491	0.111364	0.118331	0.109646	0.0961717	0.259	0.373076	0.428672	0.00155058	small	0.000565915	0.0010981	0.0970663	medium	1.14889	0.174753	0.162918	small	0.426605	0.000350467	-0.436535	medium	1.15797	0.287307	0.132414	small	0.429976	0.287307	-0.493832	medium	1.23042	0.0526459	0.238492	small	0.456877	0.0526459	-0.385205	medium	1.14011	0.141654	0.176519	small
PC	PC(30:0)	3.95073	2.47036	2.95733	3.37814	3.49537	4.48371	3.58797	2.18827	2.5747	3.3402	2.96595	4.37484	0.00118641	0.00373784	0.0869602	medium	6.40423e-07	2.20757e-06	0.187165	large	1.20972	0.698497	0.0463795	negligible	0.820137	0.0375072	-0.250692	small	0.737797	0.000759463	-0.425736	medium	0.500195	0.000759463	-0.73509	large	0.868084	0.0386724	-0.254677	small	0.588524	0.0386724	-0.564473	large	1.12618	0.559599	-0.0698785	negligible
PC	PC(31:0)	0.400572	0.293907	0.342516	0.408717	0.169933	0.675027	0.195421	0.191636	0.198882	0.27012	0.0991498	0.645612	0.0276192	0.049855	0.0426411	small	0.00225357	0.00377312	0.0781271	medium	1.97097	0.0209416	0.278705	small	0.302691	0.00155862	-0.38464	medium	1.9328	0.0459022	0.249529	small	0.296829	0.0459022	-0.44711	medium	2.00587	0.0297291	0.267924	small	0.308051	0.0297291	-0.419029	medium	2.72436	0.00146868	0.386804	medium
PC	PC(31:3)	0.144131	0.115319	0.0905254	0.123415	0.127742	0.192284	0.147105	0.121665	0.0569112	0.102603	0.109258	0.209988	0.207441	0.261984	0.0116726	small	0.00060158	0.00115205	0.096235	medium	1.3464	0.628433	0.0579515	negligible	0.700537	0.0281312	-0.264784	small	1.11356	0.776864	-0.0352111	negligible	0.579388	0.776864	-0.370333	medium	0.520889	0.0698836	-0.222926	small	0.271021	0.0698836	-0.550265	large	0.939088	0.909081	-0.0136706	negligible
PC	PC(32:0)	20.3544	18.2548	19.8441	18.9374	19.5974	19.9698	20.0651	19.4528	19.8067	18.8469	18.1231	19.5267	0.574104	0.613914	-0.00676859	small	0.567092	0.59769	-0.00651309	small	1.10716	0.245624	0.139276	small	1.02758	0.706687	0.0450569	negligible	1.07337	0.983345	-0.00259329	negligible	0.996216	0.983345	-0.107757	small	1.09289	0.365685	0.110824	small	1.01434	0.365685	0.00606776	negligible	1.03993	0.890444	-0.0164893	negligible
PC	PC(32:1)	29.6287	21.3564	28.4982	25.2862	26.0916	26.7999	26.5311	19.1642	24.9906	22.2564	22.0628	23.5921	0.0319375	0.0567132	0.0405136	small	0.0215624	0.029249	0.0462434	small	1.20253	0.145227	0.17494	small	1.12458	0.496927	0.0813792	negligible	0.86862	0.104257	-0.20264	small	0.812313	0.104257	-0.302131	medium	1.1327	0.334995	0.118135	small	1.05928	0.334995	0.0302316	negligible	1.00878	0.785552	-0.032575	negligible
PC	PC(32:2)	6.27046	4.09093	4.35987	5.27253	6.38829	7.46927	6.08242	3.56582	4.03771	5.12057	6.42114	7.54244	7.53687e-08	1.45131e-06	0.215028	large	4.45441e-10	3.52741e-09	0.281255	large	0.947249	0.6123	-0.060691	negligible	0.806426	0.0417157	-0.245338	small	0.555324	1.95769e-07	-0.674433	large	0.472767	1.95769e-07	-0.85278	large	0.628815	1.82465e-06	-0.605072	large	0.535332	1.82465e-06	-0.786246	large	0.797455	0.00571263	-0.334801	medium
PC	PC(32:3)	1.77223	1.06678	1.29024	1.4203	1.50535	1.94906	1.60406	1.01909	1.16487	1.46274	1.38135	1.97569	0.000176252	0.000748432	0.112841	medium	6.68195e-08	3.01202e-07	0.216591	large	1.16123	0.367978	0.107904	small	0.811899	0.0743984	-0.214633	small	0.737747	0.000379088	-0.450301	medium	0.515813	0.000379088	-0.776723	large	0.843282	0.0317711	-0.264622	small	0.5896	0.0317711	-0.599923	large	1.05892	0.377781	-0.105708	small
PC	PC(32:4)	0.555837	0.380842	0.602915	0.349915	0.462306	0.591269	0.592274	0.461394	0.579677	0.190774	0.563382	0.647815	0.0253821	0.0467734	0.0438734	small	0.009854	0.0145087	0.0574725	small	1.05128	0.275313	0.130831	small	0.914265	0.727677	-0.0416921	negligible	0.818972	0.34844	-0.116636	small	0.712231	0.34844	-0.284608	small	1.02892	0.15378	0.175071	small	0.894819	0.15378	0.00432273	negligible	0.338623	0.177307	-0.161952	small
PC	PC(32:5)	1.16002	0.969169	1.10378	1.0079	1.08509	1.1007	1.19697	0.976097	1.06369	1.07538	1.03361	1.05644	0.0870417	0.127516	0.0254742	small	0.112468	0.136735	0.0214991	small	1.15805	0.0919586	0.202615	small	1.13302	0.24695	0.138884	small	0.944354	0.2822	-0.133831	small	0.923948	0.2822	-0.181652	small	1.0291	0.506135	0.0814077	negligible	1.00686	0.506135	0.0257442	negligible	1.04041	0.816156	-0.0278334	negligible
PC	PC(32:6)	0.245776	0.135888	0.327876	0.0905077	0.149865	0.477002	0.078	0.0547011	0.118	0.0185843	0.0190617	0.207	0.173979	0.222601	0.0145539	small	0.0148848	0.0211712	0.0515864	small	4.09197	0.467451	0.0870545	negligible	0.376812	0.100392	-0.197498	small	2.86968	0.965387	-0.00539078	negligible	0.264256	0.965387	-0.294362	small	6.19042	0.136916	0.182617	small	0.570048	0.136916	-0.102458	small	0.974956	0.360194	-0.109674	small
PC	PC(33:0)	1.37195	0.990509	1.22251	1.22845	1.10172	2.46072	1.46874	0.93362	1.11109	1.22234	1.05655	2.3155	0.107636	0.150177	0.0221851	small	2.02705e-12	2.69967e-11	0.350251	large	1.39012	0.0529238	0.233048	small	0.634307	6.45477e-09	-0.732689	large	0.883647	0.498688	-0.0841056	negligible	0.403205	0.498688	-1.07214	large	1.05162	0.483526	0.0857944	negligible	0.479849	0.483526	-0.881565	large	1.15692	0.278475	0.129969	small
PC	PC(33:1)	7.22628	5.65585	6.73287	6.27741	5.80663	10.2477	7.11163	5.8122	6.45868	6.04622	6.66028	9.58758	0.297905	0.35627	0.00554436	small	0.000342157	0.000701064	0.103891	medium	1.06777	0.0688163	0.218943	small	0.741754	0.0164845	-0.289633	small	0.872667	0.874986	-0.0195451	negligible	0.606222	0.874986	-0.525374	large	0.969732	0.466647	0.0891432	negligible	0.673652	0.466647	-0.404958	medium	0.907804	0.738334	0.0399964	negligible
PC	PC(33:2)	3.19327	2.56443	2.43223	3.34425	3.24096	4.66421	3.30059	2.7278	2.30232	3.40038	2.96463	4.61222	0.00506433	0.0124693	0.0668596	medium	5.6626e-10	4.36616e-09	0.278172	large	1.11332	0.876154	0.0186568	negligible	0.715618	1.05848e-05	-0.543528	large	0.920112	0.0376464	-0.259963	small	0.591427	0.0376464	-0.835181	large	0.776595	0.00742204	-0.331255	medium	0.499177	0.00742204	-0.898023	large	1.14698	0.768925	0.0351726	negligible
PC	PC(33:3)	0.611516	0.652539	0.601035	0.658791	0.675499	0.989226	0.561035	0.624127	0.60734	0.625178	0.664327	0.877506	0.529956	0.570872	-0.00512978	small	4.824e-06	1.42771e-05	0.160685	large	0.844517	0.236413	-0.142042	small	0.639352	9.07592e-07	-0.610475	large	0.939488	0.983646	-0.00254643	negligible	0.711251	0.983646	-0.481285	medium	0.914219	0.241669	-0.143564	small	0.69212	0.241669	-0.617423	large	0.94107	0.962694	-0.00559915	negligible
PC	PC(33:4)	1.55048	1.45434	1.41274	1.51844	1.52994	1.63655	1.53054	1.47326	1.37316	1.55106	1.58869	1.58389	0.353645	0.41282	0.00251605	small	0.0764635	0.0961537	0.0274599	small	0.963399	0.998028	-0.00029582	negligible	0.966317	0.341004	-0.114144	small	0.927346	0.327137	-0.12191	small	0.930154	0.327137	-0.237717	small	0.864337	0.086062	-0.210995	small	0.866954	0.086062	-0.337916	medium	0.976315	0.770621	-0.0349068	negligible
PC	PC(34:1)	272.825	237.066	269.256	266.909	257.112	247.04	269.278	247.925	264.533	261.35	240.908	244.83	0.358855	0.41724	0.00225317	small	0.295868	0.3259	0.00566356	small	1.11777	0.21411	0.149074	small	1.09986	0.14757	0.173921	small	1.02913	0.70531	-0.0469881	negligible	1.01264	0.70531	-0.0257991	negligible	1.09807	0.267669	0.135886	small	1.08047	0.267669	0.157494	small	1.08486	0.249515	0.13813	small
PC	PC(34:3)	26.6177	18.7078	20.0296	21.487	24.5246	28.1651	23.8873	18.737	19.7537	20.3323	23.0078	28.2353	6.50328e-06	5.77412e-05	0.156749	large	1.13965e-08	6.81463e-08	0.239494	large	1.03823	0.261037	0.134808	small	0.846006	0.315796	-0.12027	small	0.814376	0.000219925	-0.468879	medium	0.6636	0.000219925	-0.725842	large	0.858567	0.00243785	-0.376196	medium	0.699609	0.00243785	-0.638155	large	0.883714	0.0199795	-0.280877	small
PC	PC(34:4)	14.3868	9.89513	13.2368	11.8171	12.1154	12.6222	12.4951	8.70604	11.1546	10.6102	10.374	11.8557	0.00635044	0.0148014	0.0636822	medium	0.00486325	0.00749964	0.067427	medium	1.20446	0.0457707	0.2406	small	1.05394	0.274902	0.130943	small	0.839214	0.0861394	-0.214163	small	0.734337	0.0861394	-0.32715	medium	1.07524	0.295162	0.12831	small	0.940867	0.295162	0.0149188	negligible	1.02277	0.794758	-0.0311436	negligible
PC	PC(34:5)	4.01529	2.6823	2.92055	3.40113	3.86282	4.4397	3.95322	2.6729	2.79311	3.38441	3.93644	4.20856	1.53183e-07	2.64015e-06	0.205812	large	1.74482e-09	1.27808e-08	0.263698	large	1.00426	0.896438	0.0155817	negligible	0.939328	0.1731	-0.163548	small	0.679017	5.78244e-07	-0.645718	large	0.635111	5.78244e-07	-0.81938	large	0.709554	3.15889e-05	-0.523172	large	0.663674	3.15889e-05	-0.702207	large	0.859765	0.0378006	-0.250302	small
PC	PC(35:1)	4.46164	3.50309	4.02091	4.41894	4.24173	6.44518	4.10116	3.3552	3.74975	4.28792	3.88808	6.12145	0.0504174	0.0834593	0.0337506	small	4.85804e-09	3.31025e-08	0.250502	large	1.0548	0.357436	0.110307	small	0.669966	9.01387e-06	-0.548075	large	0.862945	0.07284	-0.223955	small	0.548106	0.07284	-0.875535	large	0.964421	0.49209	-0.0841201	negligible	0.612559	0.49209	-0.736877	large	1.10284	0.429445	0.0946773	negligible
PC	PC(35:2)	8.59155	6.90669	7.03203	9.11256	9.26919	13.7712	8.46731	6.81316	6.65321	9.35952	8.6297	13.0308	0.0006419	0.0021618	0.0953521	medium	8.30269e-14	1.73763e-12	0.39093	large	0.981183	0.433678	-0.0938095	negligible	0.649791	9.34931e-10	-0.777205	large	0.789502	0.00147976	-0.401122	medium	0.52285	0.00147976	-1.10416	large	0.770967	0.00116443	-0.403925	medium	0.510575	0.00116443	-1.10818	large	1.08457	0.866064	-0.0201908	negligible
PC	PC(35:3)	3.16754	2.4772	2.63949	2.91059	3.19196	4.47371	3.3429	2.77437	2.63661	2.94827	3.05152	4.36262	0.00822539	0.0183973	0.0600328	medium	4.18309e-10	3.50184e-09	0.282062	large	1.09549	0.60902	0.0612519	negligible	0.766261	4.32728e-05	-0.502458	large	0.909178	0.0108223	-0.319784	medium	0.635942	0.0108223	-0.895963	large	0.864033	0.0280437	-0.2708	small	0.604364	0.0280437	-0.837959	large	0.966165	0.523109	-0.0764887	negligible
PC	PC(35:4)	3.30463	2.4874	2.89893	3.05771	2.71868	3.83956	3.03862	2.55059	2.55782	2.925	2.39882	3.80491	0.0899181	0.130426	0.0249735	small	0.000863036	0.00160044	0.0913151	medium	1.26672	0.0477016	0.238468	small	0.798605	0.0682018	-0.219435	small	1.06327	0.511341	-0.0816403	negligible	0.670342	0.511341	-0.531821	large	1.06628	0.549977	0.0731854	negligible	0.672243	0.549977	-0.383926	medium	1.21935	0.210679	0.150202	small
PC	PC(35:5)	2.32074	1.7185	1.76471	2.1356	2.07156	2.88557	2.42933	1.81632	1.68085	2.12338	1.91896	2.80926	0.000597409	0.00204571	0.0963297	medium	1.00172e-09	7.52576e-09	0.270839	large	1.26596	0.0880372	0.205125	small	0.864758	0.00349227	-0.354297	medium	0.946512	0.0355823	-0.262877	small	0.646548	0.0355823	-0.838273	large	0.875915	0.0333949	-0.262126	small	0.598324	0.0333949	-0.825857	large	1.10652	0.777207	0.0338767	negligible
PC	PC(36:1)	43.6911	20.3785	23.4635	21.0078	42.0311	26.0821	29.5601	14.4694	22.155	20.2645	2.86741	18.27	0.0235649	0.0442598	0.0449544	small	0.229105	0.258183	0.0100202	small	10.309	0.00380143	0.350994	medium	1.61796	0.29945	0.124417	small	5.04615	0.50335	0.0831933	negligible	0.791976	0.50335	-0.158046	small	7.72646	0.0134988	0.305142	medium	1.21264	0.0134988	0.0604962	negligible	7.06717	0.0789352	0.211322	small
PC	PC(36:2)	213.838	161.818	177.51	218.497	241.447	236.395	205.154	168.442	173.685	219.314	229.404	228.331	2.76783e-07	4.05488e-06	0.19811	large	2.37427e-06	7.40066e-06	0.170005	large	0.894293	0.026723	-0.267244	small	0.898494	0.0998428	-0.197821	small	0.734261	4.10554e-08	-0.71454	large	0.73771	4.10554e-08	-0.63821	large	0.757116	2.44474e-06	-0.597028	large	0.760672	2.44474e-06	-0.525603	large	0.956019	0.0889127	-0.204557	small
PC	PC(36:3)	128.967	101.949	116.546	134.811	144.439	133.558	117.495	108.722	117.385	135.128	141.094	131.765	0.000311312	0.00115461	0.105169	medium	0.00230997	0.00384557	0.0777852	medium	0.832739	0.0649946	-0.222064	small	0.891699	0.342318	-0.113832	small	0.770562	4.89124e-05	-0.517601	large	0.82512	4.89124e-05	-0.4094	medium	0.831965	0.00281469	-0.370624	medium	0.890871	0.00281469	-0.262541	small	0.957718	0.552147	-0.0712105	negligible
PC	PC(36:4)	311.007	273.289	294.59	299.739	289.807	240.165	306.38	272.483	285.778	290.872	279.814	236.839	0.311671	0.369715	0.00475591	small	2.22378e-05	5.7155e-05	0.140488	large	1.09494	0.141018	0.176803	small	1.29362	1.51756e-06	0.596886	large	0.973802	0.558678	-0.0726868	negligible	1.1505	0.558678	0.329015	medium	1.02131	0.718358	0.0441379	negligible	1.20663	0.718358	0.467481	medium	1.03952	0.392538	0.102469	small
PC	PC(36:5)	261.839	212.215	214.965	250.936	275.302	289.371	265.615	225.575	211.153	255.898	265.455	287.627	1.33983e-05	0.0001061	0.147201	large	3.00644e-07	1.15906e-06	0.197033	large	1.0006	0.598695	-0.0630264	negligible	0.92347	0.0901525	-0.20376	small	0.849768	0.000153706	-0.480814	medium	0.784261	0.000153706	-0.623824	large	0.795439	1.10614e-05	-0.554284	large	0.73412	1.10614e-05	-0.696141	large	0.963998	0.131713	-0.181081	small
PC	PC(36:6)	10.7916	6.35873	6.94297	7.84907	9.54692	11.6873	10.2658	6.89058	6.70632	6.95894	9.17677	11.5533	1.281e-08	4.17037e-07	0.237982	large	4.29283e-12	5.24082e-11	0.340678	large	1.11868	0.174184	0.163134	small	0.888562	0.245349	-0.139357	small	0.750872	7.90627e-06	-0.572596	large	0.596416	7.90627e-06	-0.890139	large	0.730793	6.41416e-05	-0.501411	large	0.580466	6.41416e-05	-0.818312	large	0.758321	0.00163952	-0.38279	medium
PC	PC(37:1)	0.5065	0.431618	0.421046	0.489524	0.528124	0.734396	0.499844	0.452975	0.42466	0.514607	0.475405	0.694518	0.364666	0.420658	0.00196348	small	4.3361e-07	1.5881e-06	0.192257	large	1.05141	0.799159	-0.030461	negligible	0.719699	1.99545e-05	-0.525315	large	0.95282	0.190364	-0.163107	small	0.652215	0.190364	-0.659069	large	0.893261	0.0964806	-0.204251	small	0.611446	0.0964806	-0.709095	large	1.08246	0.763141	-0.03608	negligible
PC	PC(37:2)	1.26883	1.08362	1.1175	1.27919	1.34572	2.19299	1.24275	1.01476	1.12184	1.27877	1.31542	1.90396	0.0277351	0.049855	0.04258	small	4.06154e-11	3.83881e-10	0.311958	large	0.944759	0.471023	-0.0863564	negligible	0.652719	2.6846e-08	-0.69883	large	0.771438	0.00468541	-0.355691	medium	0.532975	0.00468541	-0.959553	large	0.852835	0.0226081	-0.281235	small	0.589211	0.0226081	-0.895667	large	0.972142	0.405697	-0.099642	negligible
PC	PC(37:3)	2.08521	1.5237	1.6857	2.13491	2.1268	3.0664	1.89303	1.37457	1.55991	2.05188	1.8864	2.8973	0.0019005	0.00554518	0.0804805	medium	9.34353e-11	8.29592e-10	0.30129	large	1.00352	0.838886	-0.0243404	negligible	0.653377	1.81994e-06	-0.592034	large	0.728676	0.00273008	-0.377489	medium	0.474432	0.00273008	-0.955901	large	0.826925	0.0122632	-0.309442	medium	0.538401	0.0122632	-0.873819	large	1.08773	0.883366	0.017562	negligible
PC	PC(37:4)	7.14999	5.90605	6.28521	6.87344	6.0876	7.19784	7.18475	6.08812	5.6665	6.86154	5.78958	7.16881	0.0602173	0.0964135	0.0310836	small	0.0844382	0.10439	0.0259409	small	1.24098	0.016262	0.290244	small	1.00222	0.910403	-0.013471	negligible	1.05156	0.893009	0.0167087	negligible	0.849251	0.893009	-0.284988	small	0.978741	0.587436	0.0664163	negligible	0.790439	0.587436	-0.217011	small	1.18515	0.0587475	0.227513	small
PC	PC(37:5)	10.5115	8.28759	8.45727	10.6877	9.21725	13.4486	10.5257	8.58855	8.27107	11.0153	7.58841	13.521	0.0980651	0.138807	0.0236329	small	0.000922356	0.00168907	0.0904068	medium	1.38708	0.12649	0.183587	small	0.778473	0.0523952	-0.233576	small	1.1318	0.688374	-0.049835	negligible	0.6352	0.688374	-0.465355	medium	1.08996	0.673259	-0.05161	negligible	0.61172	0.673259	-0.47058	medium	1.4516	0.115822	0.188969	small
PC	PC(37:6)	5.22282	4.04995	4.16714	4.64299	4.66657	4.93386	5.1134	4.19866	3.87934	4.47694	4.52373	4.99463	0.00572715	0.0135734	0.0651344	medium	0.00317612	0.00511321	0.0733699	medium	1.13035	0.0705646	0.217563	small	1.02378	0.321816	0.118778	small	0.928142	0.139647	-0.184117	small	0.840636	0.139647	-0.27745	small	0.857554	0.0944222	-0.205535	small	0.776702	0.0944222	-0.301851	medium	0.989656	0.906529	-0.014056	negligible
PC	PC(37:7)	0.731213	0.572722	0.660798	0.683279	0.574882	0.771622	0.759504	0.552212	0.631362	0.719175	0.501899	0.850656	0.0474772	0.0794904	0.0346479	small	0.0542268	0.0696862	0.0326596	small	1.51326	0.0107299	0.308521	medium	0.892845	0.575941	-0.0669877	negligible	1.10025	0.910966	0.0138913	negligible	0.64916	0.910966	-0.356958	medium	1.25795	0.148935	0.177171	small	0.742206	0.148935	-0.198033	small	1.43291	0.0526259	0.233345	small
PC	PC(38:1)	1.77846	1.37515	1.45826	1.37685	1.69627	2.38026	1.87832	1.3142	1.5171	1.44614	1.81521	2.40916	0.0349857	0.0603142	0.0391729	small	1.19354e-07	5.14276e-07	0.209056	large	1.03477	0.810968	0.0286339	negligible	0.779656	0.00117036	-0.394992	medium	0.723995	0.0422839	-0.253886	small	0.545501	0.0422839	-0.685462	large	0.835774	0.143808	-0.179451	small	0.629722	0.143808	-0.618569	large	0.796682	0.0258328	-0.268857	small
PC	PC(38:2)	6.34433	5.20451	6.71846	5.86864	7.5725	7.42545	6.0842	5.14028	7.06645	6.42411	8.20105	7.48418	0.136095	0.180434	0.0184944	small	0.107092	0.131288	0.0222641	small	0.74188	0.201512	-0.153284	small	0.812941	0.192073	-0.156567	small	0.626783	0.0121516	-0.314579	medium	0.68682	0.0121516	-0.32725	medium	0.861652	0.483164	-0.0858657	negligible	0.944186	0.483164	-0.0818615	negligible	0.783328	0.120849	-0.186386	small
PC	PC(38:3)	40.7565	30.5253	38.1831	39.6422	35.5079	35.3839	38.6159	32.2047	37.2336	37.7768	37.5255	35.263	0.325936	0.385078	0.00396861	small	0.309096	0.339195	0.00490116	small	1.02906	0.229497	0.144169	small	1.09508	0.334047	0.115804	small	0.858206	0.435293	-0.0970086	negligible	0.91327	0.435293	-0.134557	small	0.99222	0.611211	0.0622252	negligible	1.05588	0.611211	0.03238	negligible	1.0067	0.37258	0.106869	small
PC	PC(38:4)	131.195	107.367	119.349	125.978	127.469	95.7091	132.493	110.411	115.347	122.165	121.388	94.6878	0.0694919	0.106603	0.0289158	small	1.61139e-05	4.37165e-05	0.144758	large	1.09148	0.347	0.11273	small	1.39926	7.92413e-07	0.614029	large	0.909568	0.061764	-0.233311	small	1.16605	0.061764	0.259281	small	0.950232	0.390943	-0.105092	small	1.21818	0.390943	0.399421	medium	1.0064	0.908281	0.0137914	negligible
PC	PC(38:5)	187.991	139.055	154.584	173.86	179.279	201.585	188.939	149.531	157.294	167.982	181.76	185.457	0.00018802	0.000786998	0.111971	medium	3.48815e-06	1.06461e-05	0.164951	large	1.0395	0.580702	0.0661529	negligible	1.01877	0.336986	-0.1151	small	0.822684	0.000294014	-0.459041	medium	0.806283	0.000294014	-0.643529	large	0.865394	0.0110796	-0.31394	medium	0.848141	0.0110796	-0.498635	medium	0.924197	0.359939	-0.109732	small
PC	PC(38:6)	163.025	131.036	142.882	145.322	161.451	192.474	158.23	130.524	135.249	144.977	153.99	183.624	0.00246247	0.00687147	0.0769004	medium	5.14085e-08	2.42947e-07	0.219992	large	1.02754	0.692472	0.0473561	negligible	0.861709	0.0103407	-0.310106	medium	0.847616	0.00234544	-0.38345	medium	0.710825	0.00234544	-0.764907	large	0.878297	0.0243852	-0.277602	small	0.736554	0.0243852	-0.644643	large	0.94147	0.0760484	-0.21341	small
PC	PC(38:7)	110.854	100.837	103.837	99.3054	101.789	76.9412	106.397	95.2644	102.028	91.9543	98.8751	77.8905	0.489366	0.533027	-0.00354908	small	0.00194019	0.00332442	0.0801953	medium	1.07607	0.122009	0.185802	small	1.36598	5.82015e-05	0.493509	medium	0.963482	0.942447	-0.00896854	negligible	1.22306	0.942447	0.265885	small	1.03189	0.55348	0.0725431	negligible	1.30989	0.55348	0.361037	medium	0.930005	0.784515	0.0327366	negligible
PC	PC(39:3)	1.45337	1.21472	1.40363	1.2515	1.15146	1.13518	1.47361	1.1969	1.35521	1.22641	1.08123	1.14003	0.0923825	0.132687	0.0245564	small	0.0774753	0.0970097	0.0272591	small	1.36291	0.0120973	0.303331	medium	1.29261	0.00951889	0.313638	medium	1.10698	0.496648	0.0845062	negligible	1.04989	0.496648	0.0990593	negligible	1.2534	0.0613794	0.230147	small	1.18875	0.0613794	0.244952	small	1.13428	0.431623	0.0942302	negligible
PC	PC(39:4)	2.25912	2.0829	1.9047	2.09635	2.13066	2.38398	2.2622	2.05215	1.83887	1.99196	2.10904	2.43114	0.0349946	0.0603142	0.0391691	small	0.00114924	0.00207856	0.0873966	medium	1.07262	0.22119	0.146786	small	0.93051	0.356988	-0.11041	small	0.973023	0.592518	-0.0665143	negligible	0.84411	0.592518	-0.307995	medium	0.871897	0.04372	-0.248329	small	0.756381	0.04372	-0.493738	medium	0.944484	0.698265	-0.046417	negligible
PC	PC(39:5)	1.18932	0.825746	0.995829	1.12094	0.972853	2.17427	1.08506	0.75825	0.860538	0.943276	0.847982	2.10914	0.131636	0.176923	0.0190225	small	4.37437e-10	3.52741e-09	0.281487	large	1.27958	0.0548315	0.231181	small	0.514455	1.48793e-06	-0.597411	large	0.894181	0.58287	-0.0682565	negligible	0.359507	0.58287	-0.924217	large	1.01481	0.75175	0.0387119	negligible	0.408004	0.75175	-0.787636	large	1.11238	0.285909	0.12797	small
PC	PC(39:6)	3.52474	2.41143	3.21104	3.3595	2.87454	5.88469	3.61543	2.02402	2.78231	3.27971	2.49086	5.6159	0.103573	0.1452	0.0227844	small	2.89641e-10	2.49602e-09	0.286781	large	1.45148	0.139402	0.17753	small	0.643784	7.23151e-07	-0.616417	large	0.81258	0.226349	-0.150632	small	0.360409	0.226349	-0.96287	large	1.11701	0.858867	0.0217584	negligible	0.495435	0.858867	-0.757199	large	1.3167	0.382766	0.104605	small
PC	PC(39:7)	3.10137	2.90336	3.2279	3.20036	1.9222	3.51146	3.32942	2.98087	2.75304	2.94787	0.571079	3.26324	0.0117789	0.0246515	0.0549334	small	0.886889	0.896064	-0.0176166	small	5.83006	0.0047867	0.341902	medium	1.02028	0.588881	-0.0647262	negligible	5.21971	0.0196367	0.292306	small	0.913467	0.0196367	-0.130918	small	4.82078	0.00296157	0.368637	medium	0.843653	0.00296157	-0.0556094	negligible	5.16193	0.00230436	0.370165	medium
PC	PC(40:1)	1.44339	0.74484	1.07689	1.01001	1.54083	1.57319	0.83521	0.582053	0.679305	0.659577	0.992165	1.12991	0.00168369	0.00513878	0.08215	medium	0.000293326	0.000609536	0.105973	medium	0.841806	0.127325	-0.183181	small	0.739185	0.0474651	-0.238725	small	0.58665	8.40231e-05	-0.500461	large	0.515134	8.40231e-05	-0.558853	large	0.68467	0.0051662	-0.346355	medium	0.601205	0.0051662	-0.405654	medium	0.664786	0.00730632	-0.32473	medium
PC	PC(40:2)	1.00257	0.452992	0.73884	0.674552	1.02585	1.29959	0.756242	0.418606	0.478174	0.55912	0.769069	0.952286	8.14537e-05	0.000426178	0.123195	medium	7.52804e-08	3.34199e-07	0.215043	large	0.983322	0.372166	-0.106962	small	0.794133	0.00835722	-0.319131	medium	0.544303	8.13597e-06	-0.57176	large	0.43958	8.13597e-06	-0.794687	large	0.621757	0.00142168	-0.396576	medium	0.502133	0.00142168	-0.609961	large	0.727009	0.0091734	-0.315205	medium
PC	PC(40:3)	0.866522	0.626238	0.698412	0.731733	0.895941	1.29572	0.894719	0.644113	0.64339	0.741061	0.838584	1.21061	0.00850515	0.0188789	0.0595595	small	2.18627e-08	1.12382e-07	0.231069	large	1.06694	0.712164	-0.0441756	negligible	0.739062	0.000256916	-0.446765	medium	0.768096	0.00335221	-0.369317	medium	0.532055	0.00335221	-0.776387	large	0.767233	0.00900304	-0.322995	medium	0.531457	0.00900304	-0.71825	large	0.883704	0.0493358	-0.23672	small
PC	PC(40:4)	5.18839	4.13461	4.72724	4.65756	5.075	5.1073	4.84071	4.36136	4.22169	4.74199	4.75633	4.88428	0.152433	0.196753	0.016686	small	0.103541	0.127468	0.0227892	small	1.01774	0.790019	0.03188	negligible	0.991079	0.998008	-0.000298872	negligible	0.916959	0.0477178	-0.247452	small	0.892939	0.0477178	-0.282541	small	0.887594	0.21553	-0.151901	small	0.864343	0.21553	-0.183277	small	0.996985	0.325047	-0.117986	small
PC	PC(40:5)	3.40216	4.47355	3.3792	2.82638	3.1856	1.71623	1.74402	3.18322	2.67196	1.43252	1.21613	0.399915	0.261316	0.319023	0.00779922	small	0.00685016	0.0102928	0.0626157	medium	1.43408	0.208359	0.150972	small	4.36098	0.00804622	0.320718	medium	2.61751	0.0269038	0.276998	small	7.95974	0.0269038	0.453131	medium	2.19711	0.206501	0.154951	small	6.68132	0.206501	0.328342	medium	1.17793	0.429737	0.0946173	negligible
PC	PC(40:6)	57.3084	42.3918	50.8668	49.9949	50.9634	65.0724	55.4586	41.0362	48.3217	48.6016	46.7337	62.5715	0.00715535	0.0162521	0.0620012	medium	5.77979e-06	1.69348e-05	0.158303	large	1.18669	0.0583489	0.227877	small	0.886324	0.169642	-0.164882	small	0.878086	0.0434104	-0.252497	small	0.655828	0.0434104	-0.672396	large	1.03398	0.985531	0.00221896	negligible	0.772263	0.985531	-0.408594	medium	1.03997	0.953261	-0.00701628	negligible
PC	PC(40:7)	67.2854	56.0575	62.3359	63.6361	57.2352	50.5527	69.0875	56.6073	57.3642	59.2993	57.1435	48.2303	0.254056	0.31213	0.00827824	small	0.0321804	0.0424723	0.0404023	small	1.20902	0.049028	0.237045	small	1.43245	0.00250299	0.36705	medium	0.990616	0.99905	-0.000147899	negligible	1.17369	0.99905	0.121537	small	1.00386	0.36475	0.111041	small	1.18938	0.36475	0.237688	small	1.03773	0.273135	0.131428	small
PC	PC(40:8)	13.6202	10.9585	13.4111	11.8523	12.8666	13.4325	9.5137	8.70964	9.2943	10.4819	8.93475	8.71717	0.832023	0.861423	-0.0156201	small	0.904789	0.911008	-0.0183163	small	1.0648	0.320813	0.119026	small	1.09137	0.623131	0.0588484	negligible	0.974806	0.968406	0.00492035	negligible	0.999137	0.968406	-0.0638798	negligible	1.04024	0.479256	0.0866353	negligible	1.06621	0.479256	0.0206202	negligible	1.17316	0.573435	0.0674283	negligible
PC	PC(40:9)	62.4992	50.0174	46.925	42.4815	46.0998	82.14	56.6028	46.081	37.6203	36.3473	47.8121	74.9557	0.137171	0.181041	0.0183693	small	0.000228843	0.000496542	0.109324	medium	1.18386	0.0663199	0.220965	small	0.755151	0.101938	-0.196598	small	0.963794	0.8332	0.0261637	negligible	0.614777	0.8332	-0.397546	medium	0.786837	0.961649	0.00588352	negligible	0.501901	0.961649	-0.434563	medium	0.760211	0.484266	-0.0837938	negligible
PC	PC(41:4)	0.589937	0.359326	0.544221	0.347412	0.427078	0.5077	0.195413	0.184817	0.349714	0.183473	0.173634	0.172345	0.387376	0.441638	0.00086489	small	0.487556	0.519469	-0.00347668	small	1.12543	0.231173	0.143649	small	1.13385	0.383667	0.104407	small	1.0644	0.838351	0.0253441	negligible	1.07237	0.838351	-0.0107332	negligible	2.01409	0.110972	0.195788	small	2.02916	0.110972	0.154759	small	1.05666	0.909572	0.0135964	negligible
PC	PC(41:5)	0.525193	0.432679	0.414196	0.52357	0.457162	0.45542	0.397334	0.353988	0.23405	0.573567	0.24395	0.318255	0.391033	0.442365	0.000692658	small	0.498619	0.527421	-0.00391658	small	1.62875	0.204678	0.152208	small	1.24847	0.348642	0.112346	small	1.45107	0.720555	0.0444467	negligible	1.11228	0.720555	0.00725191	negligible	0.959418	0.968902	0.00477018	negligible	0.735417	0.968902	-0.0220747	negligible	2.35116	0.118898	0.187378	small
PC	PC(41:8)	1.20799	0.844048	1.03739	0.903985	1.00858	1.40991	1.17192	0.860922	1.00626	0.823161	0.943734	1.26553	0.000148007	0.000677595	0.115189	medium	3.06033e-06	9.43869e-06	0.166671	large	1.24179	0.0189481	0.28331	small	0.926032	0.620896	-0.0592274	negligible	0.912251	0.0258776	-0.278921	small	0.680285	0.0258776	-0.597027	large	1.06625	0.643335	0.0566757	negligible	0.795127	0.643335	-0.275168	small	0.872238	0.122987	-0.185313	small
PC	PC(42:2)	2.40516	1.55806	3.34733	2.94549	1.87609	1.83491	1.08268	0.635488	2.52086	0.941488	1.03354	0.949431	0.428909	0.479658	-0.00102346	small	0.403658	0.434822	0.000107345	small	1.04755	0.935121	0.00974477	negligible	1.14035	0.633934	0.0570243	negligible	0.614868	0.356367	-0.114726	small	0.669336	0.356367	-0.0679515	negligible	2.43906	0.28828	0.130159	small	2.65512	0.28828	0.174582	small	0.910939	0.864851	-0.0203754	negligible
PC	PC(42:4)	0.792104	0.556428	0.593936	0.670442	0.897289	0.980133	0.750577	0.480593	0.522711	0.581351	0.854929	0.926998	0.000139014	0.000656955	0.116031	medium	4.51694e-05	0.000112158	0.131066	medium	0.877941	0.456345	-0.0892441	negligible	0.809686	0.277386	-0.130265	small	0.562143	0.000110102	-0.491738	medium	0.51844	0.000110102	-0.54011	large	0.611409	0.000274406	-0.454455	medium	0.563875	0.000274406	-0.488509	medium	0.68	0.0051388	-0.339065	medium
PC	PC(42:5)	0.436361	0.274424	0.263772	0.129757	0.387808	0.807719	0.2176	0.0382469	0.0312543	0.0350446	0.0390449	0.782918	0.0339991	0.0596511	0.0395941	small	2.56226e-07	1.01452e-06	0.199116	large	5.57307	0.197523	0.154657	small	0.277934	0.0101293	-0.31099	medium	0.979563	0.568718	-0.0708373	negligible	0.0488518	0.568718	-0.551177	large	0.800472	0.123648	-0.18908	small	0.0399203	0.123648	-0.670362	large	0.897547	0.151016	-0.172444	small
PC	PC(42:6)	0.606616	0.432093	0.384124	0.315724	0.414128	1.46245	0.201013	0.00985932	0.00939299	0.00933191	0.00984616	1.58421	0.485484	0.530772	-0.00339355	small	3.61515e-08	1.79532e-07	0.224556	large	20.4154	0.430878	0.0943831	negligible	0.126885	1.89932e-05	-0.526749	large	1.00134	0.767333	-0.0367591	negligible	0.00622349	0.767333	-0.671149	large	0.953976	0.645931	-0.0562323	negligible	0.00592913	0.645931	-0.697494	large	0.947772	0.32387	-0.118274	small
PC	PC(42:7)	2.13352	1.72692	2.28227	2.34141	2.00222	2.27318	2.08891	1.8573	1.96235	2.36067	1.9861	2.24353	0.243503	0.302315	0.00899605	small	0.187021	0.214052	0.0133763	small	1.05176	0.509871	0.0789448	negligible	0.931079	0.537989	-0.0737659	negligible	0.935147	0.367459	-0.112099	small	0.827845	0.367459	-0.26735	small	0.988042	0.454632	0.0915683	negligible	0.87467	0.454632	-0.0597447	negligible	1.18859	0.185898	0.15878	small
PC	PC(42:10)	2.47264	2.08899	2.19572	2.12247	2.39283	4.45999	1.98006	2.0119	1.79354	2.02426	1.79844	4.52354	0.990373	0.990373	-0.0228936	small	1.21611e-05	3.36151e-05	0.148483	large	1.10099	0.655281	0.0534584	negligible	0.437724	5.6026e-05	-0.494665	medium	1.11869	0.915666	0.0131551	negligible	0.444763	0.915666	-0.55896	large	0.997272	0.975087	-0.00382114	negligible	0.39649	0.975087	-0.565446	large	1.12556	0.87013	0.0195722	negligible
PC	PC(43:6)	0.908694	0.922741	0.796216	0.903009	0.936766	1.47963	1.05635	0.951048	0.8494	0.821338	1.16595	1.03403	0.886211	0.901597	-0.0175907	small	0.836	0.847571	-0.0157598	small	0.905998	0.986336	0.00205018	negligible	1.02158	0.947283	-0.00791495	negligible	0.815687	0.726789	-0.0434129	negligible	0.919747	0.726789	-0.0635704	negligible	0.728506	0.394892	-0.104216	small	0.821444	0.394892	-0.118532	small	0.704438	0.555642	-0.0705847	negligible
PC	PC(44:1)	0.994675	0.949561	1.46837	1.17207	0.936463	0.689925	0.81767	0.684477	1.45024	1.05995	0.749726	0.415792	0.0248862	0.0461498	0.0441608	small	0.00214254	0.0036287	0.0788254	medium	1.09062	0.79098	0.0317305	negligible	1.96654	0.149712	0.173	small	0.912969	0.868688	0.0205386	negligible	1.6462	0.868688	0.165223	small	1.93436	0.00452663	0.351742	medium	3.4879	0.00452663	0.48961	medium	1.41379	0.135086	0.179504	small
PC	PC(46:2)	0.543345	0.606681	0.89247	1.18324	1.10134	0.561237	0.379809	0.389657	0.847355	0.791869	0.633879	0.144771	0.0292518	0.0522609	0.0418013	small	0.0110525	0.0161152	0.0558405	small	0.599182	0.0176945	-0.28643	small	2.62352	0.805405	0.0294937	negligible	0.614718	0.0788983	-0.219327	small	2.69154	0.0788983	0.102669	small	1.33678	0.791223	-0.0323946	negligible	5.85307	0.791223	0.292154	small	1.24924	0.750759	0.0380297	negligible
PC	PC-O(30:0)	0.39157	0.292192	0.407911	0.341837	0.365172	0.457396	0.356012	0.291736	0.361254	0.333559	0.322274	0.48166	0.466171	0.513489	-0.00260711	small	0.0319752	0.0423924	0.0404963	small	1.10469	0.579352	0.0663892	negligible	0.739136	0.126288	-0.183685	small	0.905243	0.246226	-0.144349	small	0.605689	0.246226	-0.394049	medium	1.12095	0.716481	0.0444453	negligible	0.750019	0.716481	-0.184716	small	1.03502	0.698834	-0.0463249	negligible
PC	PC-O(32:1)	2.34345	2.1157	2.21866	2.35097	2.28474	2.17403	2.3188	2.16296	2.05339	2.21153	2.09007	2.21686	0.66732	0.703327	-0.0100367	small	0.63169	0.65633	-0.00881129	small	1.10944	0.276432	0.130525	small	1.04598	0.235334	0.142371	small	1.03487	0.799793	-0.0315087	negligible	0.975686	0.799793	-0.022485	negligible	0.982454	0.909947	-0.0138397	negligible	0.926263	0.909947	-0.00283758	negligible	1.05811	0.62866	0.0579132	negligible
PC	PC-O(32:3)	0.268181	0.201743	0.184794	0.228577	0.20359	0.292669	0.263901	0.196177	0.189633	0.22209	0.216611	0.278326	0.0220109	0.0416076	0.0459449	small	7.63484e-05	0.000183361	0.124061	medium	1.21831	0.0180446	0.285539	small	0.948169	0.253379	-0.137004	small	0.905663	0.774239	-0.0356369	negligible	0.704845	0.774239	-0.479089	medium	0.875454	0.417336	-0.0993399	negligible	0.681334	0.417336	-0.534023	large	1.02529	0.496994	0.0813665	negligible
PC	PC-O(34:0)	0.395157	0.420616	0.38824	0.595214	0.395451	0.51199	0.00963838	0.280959	0.201714	0.586937	0.148489	0.482386	0.308536	0.367484	0.0049329	small	0.160834	0.188497	0.015824	small	0.0649096	0.584693	-0.0654554	negligible	0.0199806	0.0738812	-0.215021	small	1.89212	0.962081	0.00590602	negligible	0.582436	0.962081	-0.147277	small	1.35844	0.857455	-0.0219784	negligible	0.418159	0.857455	-0.172103	small	3.95272	0.138357	0.178003	small
PC	PC-O(34:1)	6.05529	5.59157	5.84821	6.32037	5.89673	4.9109	5.84203	5.67916	5.48478	6.24086	5.75651	4.96381	0.438298	0.486444	-0.00143143	small	0.00178523	0.00309509	0.0813433	medium	1.01486	0.52966	0.0752851	negligible	1.17692	0.00116436	0.395176	medium	0.986563	0.83946	-0.0251679	negligible	1.14411	0.83946	0.293609	small	0.952796	0.797013	-0.0314756	negligible	1.10495	0.797013	0.281881	small	1.08414	0.168486	0.165332	small
PC	PC-O(34:2)	9.6188	7.50147	7.55823	9.11761	10.7474	9.40043	9.69472	7.27104	7.39875	8.814	9.81652	9.7353	1.20646e-05	9.81927e-05	0.148588	large	0.000408694	0.000820877	0.101485	medium	0.987592	0.183169	-0.159776	small	0.995831	0.96677	0.00498698	negligible	0.740694	1.28082e-05	-0.558409	large	0.746874	1.28082e-05	-0.393736	medium	0.753704	8.74241e-06	-0.561093	large	0.759992	8.74241e-06	-0.396009	medium	0.897875	0.0636799	-0.223174	small
PC	PC-O(34:3)	9.16131	7.51301	7.06418	8.77071	10.6746	9.6217	9.1691	7.50541	6.91581	8.23214	10.4694	9.76786	1.19854e-06	1.65081e-05	0.178968	large	0.000409038	0.000820877	0.101473	medium	0.875799	0.015585	-0.292151	small	0.938702	0.418553	-0.0969337	negligible	0.716889	3.34494e-06	-0.597309	large	0.768378	3.34494e-06	-0.394303	medium	0.660573	4.95383e-08	-0.699118	large	0.708018	4.95383e-08	-0.495567	medium	0.786303	0.00272095	-0.363885	medium
PC	PC-O(34:4)	1.87463	1.55761	1.76161	1.84104	1.80641	1.75049	1.85628	1.53316	1.70092	1.71987	1.81864	1.67431	0.218933	0.275311	0.0107781	small	0.212999	0.240961	0.0112346	small	1.0207	0.671408	0.050796	negligible	1.10869	0.190356	0.157177	small	0.843027	0.0679202	-0.227954	small	0.915697	0.0679202	-0.134839	small	0.935274	0.492659	-0.0840093	negligible	1.0159	0.492659	0.0217887	negligible	0.945692	0.809801	-0.0288141	negligible
PC	PC-O(35:3)	1.30649	1.06748	1.07369	1.28542	1.37543	1.56685	1.27151	1.10818	1.16384	1.28258	1.30136	1.46233	0.00358371	0.00954571	0.07169	medium	1.64134e-05	4.41204e-05	0.144514	large	0.977062	0.748855	-0.0383304	negligible	0.869513	0.0259517	-0.268639	small	0.851551	0.00263703	-0.378856	medium	0.757817	0.00263703	-0.601347	large	0.894327	0.00636841	-0.337697	medium	0.795885	0.00636841	-0.565509	large	0.98557	0.599649	-0.0628618	negligible
PC	PC-O(36:2)	2.60732	2.38961	2.46895	2.79447	2.84944	2.88557	2.46546	2.38797	2.19864	2.89349	2.89326	2.84282	0.0683467	0.105955	0.0291681	small	0.0732716	0.092537	0.0281102	small	0.85214	0.189668	-0.157423	small	0.867261	0.219127	-0.147447	small	0.825357	0.0323971	-0.267673	small	0.840003	0.0323971	-0.259758	small	0.759917	0.0203172	-0.286306	small	0.773401	0.0203172	-0.287142	small	1.00008	0.756136	-0.0371817	negligible
PC	PC-O(36:3)	7.39483	5.74425	5.97928	7.24558	8.21849	7.26899	7.37008	5.6167	5.62605	7.30488	7.74426	7.01291	1.44294e-05	0.000111258	0.14622	large	0.000593668	0.00114437	0.0964152	medium	0.951683	0.161297	-0.168187	small	1.05093	0.886449	0.0170946	negligible	0.725273	1.07127e-05	-0.563692	large	0.800909	1.07127e-05	-0.379563	medium	0.726481	1.87137e-05	-0.538853	large	0.802242	1.87137e-05	-0.354318	medium	0.943264	0.127914	-0.182896	small
PC	PC-O(36:4)	23.0614	17.9948	19.8514	21.5586	23.5212	16.1489	22.7388	18.4714	19.1921	20.9573	22.3869	16.2059	0.00194571	0.00558913	0.0801562	medium	5.19066e-07	1.85471e-06	0.189909	large	1.01572	0.928234	0.0107818	negligible	1.40312	7.02662e-09	0.730698	large	0.825098	0.000823007	-0.422827	medium	1.1398	0.000823007	0.2717	small	0.85729	0.0161898	-0.296875	small	1.18427	0.0161898	0.408361	medium	0.93614	0.219746	-0.147248	small
PC	PC-O(36:5)	19.3473	14.4623	15.5039	17.9905	19.713	15.3686	19.2664	14.7258	15.3995	16.9577	18.8553	15.16	1.5439e-05	0.00011599	0.145325	large	9.96173e-05	0.000228505	0.1205	medium	1.0218	0.818424	0.0274839	negligible	1.27087	0.00017423	0.459324	medium	0.780991	5.13476e-05	-0.516079	large	0.971356	5.13476e-05	-0.0773742	negligible	0.816723	0.000459013	-0.436966	medium	1.0158	0.000459013	0.00251777	negligible	0.899363	0.148471	-0.173532	small
PC	PC-O(36:6)	5.9136	4.30297	4.10129	5.18096	6.25508	6.54911	5.70059	4.2949	4.04806	5.07217	6.26469	6.59537	5.10712e-08	1.24699e-06	0.220077	large	7.48894e-09	4.87613e-08	0.244917	large	0.909956	0.376242	-0.106051	small	0.864332	0.135784	-0.179181	small	0.685573	8.76321e-07	-0.634474	large	0.651199	8.76321e-07	-0.704206	large	0.64617	5.27567e-08	-0.697546	large	0.613772	5.27567e-08	-0.767582	large	0.809645	0.00716948	-0.325512	medium
PC	PC-O(37:6)	0.8057	0.643954	0.654844	0.824556	0.852085	0.948383	0.785278	0.666659	0.623417	0.837527	0.83079	0.921414	2.48938e-05	0.000173664	0.13899	medium	5.37917e-07	1.89891e-06	0.189443	large	0.945218	0.556861	-0.0703669	negligible	0.852253	0.055678	-0.23037	small	0.802439	0.000185666	-0.474548	medium	0.723517	0.000185666	-0.628041	large	0.750391	5.43905e-05	-0.506537	large	0.676587	5.43905e-05	-0.663841	large	1.00811	0.469747	-0.0866054	negligible
PC	PC-O(38:3)	0.699683	0.73826	0.830464	0.924562	0.512518	0.799922	0.564176	0.778235	0.699788	0.88582	0.153141	0.74479	0.0641022	0.100438	0.0301394	small	0.589725	0.617105	-0.00733196	small	3.68403	0.233927	0.142801	small	0.757497	0.256864	-0.135999	small	5.08182	0.0461756	0.249212	small	1.0449	0.0461756	-0.0295454	negligible	4.56956	0.0265501	0.273478	small	0.939577	0.0265501	-0.0125349	negligible	5.78434	0.00759864	0.323103	medium
PC	PC-O(38:4)	10.1275	9.0641	9.68259	10.0574	10.6758	8.11065	10.0473	9.0889	8.94356	10.1021	10.005	7.97401	0.238286	0.297097	0.00936087	small	0.00175678	0.00306391	0.0815647	medium	1.00423	0.585557	-0.0653047	negligible	1.26001	0.000247823	0.447942	medium	0.908436	0.0340203	-0.26518	small	1.13982	0.0340203	0.231862	small	0.89391	0.16038	-0.172291	small	1.12159	0.16038	0.332588	medium	1.0097	0.533919	-0.0745068	negligible
PC	PC-O(38:5)	20.8542	17.1024	18.7796	20.0821	21.5736	15.5495	21.6162	17.4636	17.9079	19.4378	20.5756	15.4696	0.00452552	0.0115302	0.068434	medium	1.96833e-06	6.33758e-06	0.172466	large	1.05057	0.751218	-0.0379572	negligible	1.39734	4.00034e-08	0.689179	large	0.848751	0.00108431	-0.412732	medium	1.1289	0.00108431	0.292028	small	0.870345	0.0117474	-0.311352	medium	1.15762	0.0117474	0.424495	medium	0.944697	0.184811	-0.159176	small
PC	PC-O(38:6)	12.8986	9.23889	9.74924	11.2243	12.7996	13.2815	12.5322	10.0442	9.6179	9.87065	12.0237	13.1933	2.39839e-06	2.70281e-05	0.169873	large	4.35441e-08	2.09155e-07	0.222145	large	1.04229	0.78442	0.0327514	negligible	0.94989	0.43538	-0.0934621	negligible	0.835366	3.77044e-05	-0.525702	large	0.761309	3.77044e-05	-0.674284	large	0.799912	4.73902e-05	-0.510791	large	0.728998	4.73902e-05	-0.654185	large	0.820932	0.022529	-0.275306	small
PC	PC-O(40:4)	0.831881	0.904405	0.9379	0.83235	0.669632	0.678611	0.886798	0.983981	0.906812	0.803641	0.665139	0.567201	0.100872	0.142094	0.0231951	small	0.117846	0.142094	0.0207671	small	1.33325	0.0760089	0.213439	small	1.56346	0.0903713	0.20362	small	1.47936	0.0219896	0.286872	small	1.7348	0.0219896	0.280563	small	1.36334	0.0137563	0.30429	medium	1.59875	0.0137563	0.294816	small	1.20823	0.0962155	0.199987	small
PC	PC-O(40:5)	1.96816	1.95135	2.11545	2.06308	2.19302	1.98139	1.8199	1.72449	1.95013	2.01782	1.94495	1.99076	0.658881	0.696939	-0.00974845	small	0.803454	0.817403	-0.0146318	small	0.935709	0.401422	-0.100554	small	0.914175	0.793209	-0.0313841	negligible	0.886652	0.202585	-0.15869	small	0.866247	0.202585	-0.0897793	negligible	1.00267	0.776371	-0.0347603	negligible	0.979593	0.776371	0.0287521	negligible	1.03747	0.958864	-0.00617438	negligible
PC	PC-O(40:6)	3.75938	3.27003	3.22617	3.36958	3.72838	4.66547	3.61083	3.38974	2.93356	3.23325	3.50704	4.62251	0.0440807	0.0746569	0.0357532	small	4.74164e-07	1.71519e-06	0.19109	large	1.02959	0.611799	0.0607767	negligible	0.78114	0.00288341	-0.361674	medium	0.966553	0.175584	-0.168741	small	0.733312	0.175584	-0.597837	large	0.836478	0.0247748	-0.276837	small	0.634626	0.0247748	-0.704778	large	0.921931	0.173553	-0.163375	small
PC	PC-O(40:7)	8.31476	7.03307	7.40805	7.77798	8.14199	8.50436	7.47884	7.02931	6.96785	7.65981	7.48289	8.44512	0.171776	0.220747	0.0147605	small	0.0151574	0.0213515	0.0513261	small	0.99946	0.499137	0.0809613	negligible	0.885582	0.523372	-0.0764402	negligible	0.939384	0.143104	-0.182514	small	0.832352	0.143104	-0.34891	medium	0.931171	0.181838	-0.163814	small	0.825075	0.181838	-0.339365	medium	1.02364	0.610383	-0.0610187	negligible
PC	PC-O(40:8)	10.4961	8.62967	9.49473	9.95187	10.8296	8.27796	9.97848	8.77009	9.19044	9.52674	10.488	7.97714	0.117941	0.16148	0.0207544	small	0.0191551	0.0263494	0.0479562	small	0.951415	0.723269	-0.0423958	negligible	1.25088	0.00115539	0.395453	medium	0.836199	0.0204632	-0.290335	small	1.0994	0.0204632	0.118798	small	0.876278	0.0814428	-0.214199	small	1.1521	0.0814428	0.228146	small	0.908343	0.210755	-0.150177	small
PC	PC-O(42:4)	0.290938	0.287315	0.401283	0.386344	0.228639	0.155195	0.0388796	0.259352	0.340548	0.402794	0.0384263	0.0327615	0.126558	0.170883	0.0196444	small	0.00190045	0.00327548	0.0804808	medium	1.0118	0.67183	0.0507267	negligible	1.18675	0.0435951	0.243095	small	6.74934	0.357766	0.114392	small	7.91636	0.357766	0.298079	small	8.86236	0.0524984	0.238642	small	10.3947	0.0524984	0.432002	medium	10.4822	0.0281956	0.264674	small
PC	PC-O(42:5)	1.12229	1.17239	1.15416	1.19023	1.02457	1.02353	1.01703	1.05302	1.13793	1.1301	0.99662	1.019	0.744156	0.778706	-0.0126275	small	0.765196	0.783924	-0.0133347	small	1.02048	0.669642	0.0510863	negligible	0.998068	0.761145	0.0363936	negligible	1.05659	0.308906	0.126605	small	1.03338	0.308906	0.11827	small	1.14179	0.355029	0.113316	small	1.11671	0.355029	0.106616	small	1.13393	0.239119	0.141221	small
PC	PC-O(42:6)	0.851554	0.835822	0.865754	0.883373	0.821274	1.04336	0.905289	0.889335	0.899629	0.891859	0.823503	1.01712	0.957349	0.963929	-0.020679	small	0.23607	0.264002	0.00951794	small	1.09931	0.858467	0.0213481	negligible	0.890051	0.0445878	-0.241944	small	1.07994	0.874123	0.0196812	negligible	0.874365	0.874123	-0.243249	small	1.09244	0.621532	0.0604286	negligible	0.884486	0.621532	-0.204501	small	1.08301	0.485079	0.0836376	negligible
Cer	Cer(40:1)	0.784019	0.557492	0.682377	0.725266	0.851292	1.07908	0.772757	0.545982	0.641901	0.72199	0.84903	0.981337	4.50914e-05	0.000275245	0.131089	medium	2.09446e-08	1.09585e-07	0.231624	large	0.910164	0.196568	-0.154989	small	0.787453	0.00114758	-0.395695	medium	0.643065	1.51369e-06	-0.619489	large	0.556365	1.51369e-06	-0.858888	large	0.756041	0.00126977	-0.400749	medium	0.654109	0.00126977	-0.63934	large	0.85037	0.0274719	-0.265922	small
Cer	Cer(41:1)	1.07265	0.912985	0.954795	1.11157	1.25702	1.38124	1.08357	0.92752	0.929124	1.13912	1.20397	1.34126	0.00864318	0.0189065	0.0593316	small	0.000160962	0.000357288	0.114061	medium	0.900002	0.0801049	-0.210494	small	0.807876	0.0043615	-0.345593	medium	0.770387	0.00151021	-0.400353	medium	0.691528	0.00151021	-0.539856	large	0.77172	0.00232909	-0.377952	medium	0.692725	0.00232909	-0.517801	large	0.946135	0.185257	-0.159013	small
Cer	Cer(42:1)	3.275	2.86238	2.96655	3.24111	3.65057	2.99288	3.01914	2.93935	2.65774	3.27886	3.44295	2.88081	0.017731	0.0344051	0.0490708	small	0.202394	0.229851	0.0120793	small	0.876906	0.260982	-0.134824	small	1.04802	0.17718	0.162	small	0.853731	0.00610089	-0.344669	medium	1.02032	0.00610089	-0.0479621	negligible	0.771938	0.00298046	-0.368388	medium	0.922569	0.00298046	-0.0675004	negligible	0.952341	0.175334	-0.162697	small
Cer	Cer(42:2)	2.6668	2.16345	2.55219	2.3743	2.64064	2.36089	2.68488	2.20084	2.45383	2.23501	2.44947	2.41138	0.0614245	0.0972831	0.0307841	small	0.057751	0.0735697	0.0317135	small	1.09611	0.398716	0.101135	small	1.11342	0.0630828	0.223684	small	0.898499	0.0606981	-0.234284	small	0.912689	0.0606981	-0.122537	small	1.00178	0.891533	-0.0166858	negligible	1.0176	0.891533	0.098382	negligible	0.912447	0.200435	-0.153652	small
Cer	Cer(43:1)	0.629057	0.530433	0.556557	0.614423	0.656346	0.735663	0.638454	0.573144	0.579775	0.625842	0.661463	0.760577	0.0692476	0.106603	0.0289693	small	0.00292527	0.00481518	0.0745128	medium	0.965216	0.597328	-0.0632624	negligible	0.839434	0.068783	-0.21897	small	0.866479	0.0146927	-0.305909	medium	0.753564	0.0146927	-0.459658	medium	0.876505	0.036249	-0.257981	small	0.762283	0.036249	-0.407318	medium	0.946149	0.417554	-0.0971423	negligible
SM	SM(30:1)	0.493624	0.346461	0.423061	0.424327	0.393643	0.684509	0.531412	0.394304	0.431231	0.422533	0.348543	0.698596	0.020146	0.0385802	0.0472272	small	2.09456e-09	1.49684e-08	0.261346	large	1.52467	0.00530433	0.337792	medium	0.760686	8.969e-05	-0.480237	medium	1.13129	0.669061	-0.053114	negligible	0.564423	0.669061	-0.885366	large	1.23724	0.298499	0.127424	small	0.617281	0.298499	-0.700927	large	1.21228	0.294847	0.125613	small
SM	SM(31:0)	0.783892	0.463931	0.863351	0.562364	0.868121	0.639001	0.558343	0.482985	0.355844	0.501611	0.581302	0.544983	0.232979	0.291721	0.00973922	small	0.350243	0.381492	0.00268935	small	0.960504	0.962415	-0.00564103	negligible	1.02451	0.504888	0.0798782	negligible	0.830867	0.0442622	-0.251466	small	0.886238	0.0442622	-0.171426	small	0.612149	0.508268	-0.0809992	negligible	0.652945	0.508268	-0.00106213	negligible	0.862908	0.246735	-0.138948	small
SM	SM(32:1)	10.4473	8.22377	9.02176	10.0898	9.89183	14.5758	10.8222	7.83124	9.10452	10.3893	9.30797	14.3987	0.00636509	0.0148014	0.0636498	medium	5.5344e-12	6.48632e-11	0.337435	large	1.16268	0.12295	0.185332	small	0.751612	1.48617e-06	-0.597443	large	0.841347	0.0398648	-0.256981	small	0.543886	0.0398648	-1.05117	large	0.978142	0.315726	-0.122951	small	0.632316	0.315726	-0.914245	large	1.11618	0.545746	0.0723618	negligible
SM	SM(33:1)	11.374	9.48506	9.82638	11.1925	10.7771	12.6126	11.2884	9.29648	9.20267	10.6057	10.5063	13.0011	0.0472943	0.0794904	0.0347055	small	9.84305e-05	0.000228505	0.120661	medium	1.07445	0.451477	0.0902134	negligible	0.868264	0.0531401	-0.232834	small	0.884851	0.0771681	-0.220618	small	0.715052	0.0771681	-0.548894	large	0.875923	0.123668	-0.18907	small	0.707836	0.123668	-0.516534	large	1.00947	0.811397	0.0285676	negligible
SM	SM(33:2)	15.1306	9.35703	8.31241	9.18704	21.901	23.3648	6.89	3.505	3.11	2.72	18.6	21.8	0.000349245	0.00126332	0.103614	medium	0.00121871	0.00216414	0.0865918	medium	0.37043	0.0346429	-0.254639	small	0.316055	0.0527279	-0.233243	small	0.188441	0.00117235	-0.40984	medium	0.16078	0.00117235	-0.374642	medium	0.167204	0.000417315	-0.440242	medium	0.142661	0.000417315	-0.410676	medium	0.146237	2.71588e-05	-0.516299	large
SM	SM(34:1)	124.727	115.77	121.229	125.616	124.536	134.009	128.926	117.288	116.404	118.333	122.438	134.963	0.760704	0.79319	-0.0131835	small	0.078317	0.0976463	0.027094	small	1.05298	0.413293	0.0980356	negligible	0.955265	0.150108	-0.172831	small	0.957932	0.726219	-0.0435073	negligible	0.869034	0.726219	-0.309646	medium	0.950719	0.832577	-0.025868	negligible	0.86249	0.832577	-0.3072	medium	0.966469	0.643171	0.0554752	negligible
SM	SM(34:2)	18.7567	15.6761	15.6034	17.8282	19.371	19.8487	18.9711	16.5153	15.774	17.4462	19.0707	19.6618	0.00266364	0.0073627	0.0758125	medium	0.000504966	0.000999696	0.0986149	medium	0.994782	0.979518	0.00307326	negligible	0.964873	0.385805	-0.103937	small	0.866008	0.0142446	-0.307335	medium	0.839971	0.0142446	-0.400969	medium	0.827137	0.00120176	-0.40277	medium	0.802269	0.00120176	-0.494878	medium	0.914821	0.268304	-0.132765	small
SM	SM(35:1)	3.5273	3.29283	3.21655	3.51447	3.35648	4.82573	3.65905	3.16429	3.201	3.53876	3.46134	4.59735	0.482484	0.529467	-0.00327278	small	8.6739e-08	3.79321e-07	0.213203	large	1.05712	0.556135	0.0704966	negligible	0.795904	5.30374e-06	-0.562905	large	0.91418	0.534815	-0.0771499	negligible	0.688285	0.534815	-0.708798	large	0.924787	0.397294	-0.103687	small	0.696271	0.397294	-0.740059	large	1.02237	0.561098	0.0696117	negligible
SM	SM(36:1)	45.2516	41.5724	45.8221	42.5376	43.7359	46.3358	47.8662	41.9485	45.6341	40.0578	43.3977	43.4618	0.393769	0.443747	0.0005646	small	0.413421	0.443708	-0.000335912	small	1.10297	0.263288	0.134171	small	1.10134	0.937061	0.00945273	negligible	0.966608	0.806398	-0.0304477	negligible	0.965181	0.806398	-0.149667	small	1.05153	0.211243	0.153337	small	1.04998	0.211243	0.0290675	negligible	0.923039	0.895901	-0.0156631	negligible
SM	SM(36:2)	7.17312	6.31212	6.40891	6.45686	7.01184	7.58385	7.6144	6.07669	6.26658	6.2095	6.82999	7.56113	0.202994	0.257477	0.0120305	small	0.011428	0.0164947	0.0553645	small	1.11485	0.48722	0.0832273	negligible	1.00704	0.436065	-0.0933224	negligible	0.889707	0.195927	-0.161072	small	0.803675	0.195927	-0.345361	medium	0.917509	0.258749	-0.138459	small	0.828788	0.258749	-0.3293	medium	0.909152	0.288736	-0.127219	small
SM	SM(37:1)	2.89367	2.32648	2.50455	2.89621	2.56308	3.70848	2.76438	2.2083	2.28594	2.87622	2.55062	3.75925	0.0897062	0.130426	0.0250099	small	1.16604e-05	3.25381e-05	0.149039	large	1.08381	0.219858	0.147213	small	0.735355	0.00214775	-0.372802	medium	0.86579	0.311816	-0.125844	small	0.58743	0.311816	-0.641263	large	0.896232	0.642591	-0.0568027	negligible	0.608085	0.642591	-0.566841	large	1.12766	0.186443	0.158583	small
SM	SM(38:1)	21.7838	17.3715	19.3355	20.8625	22.1532	27.4961	21.2415	18.0858	17.6738	20.9807	20.3193	25.5248	0.00679414	0.0155615	0.0627314	medium	1.26941e-07	5.39041e-07	0.208255	large	1.04538	0.959336	-0.00610349	negligible	0.832189	0.00111308	-0.396785	medium	0.89008	0.00166439	-0.396667	medium	0.708559	0.00166439	-0.794364	large	0.869801	0.0522445	-0.238902	small	0.692415	0.0522445	-0.635494	large	1.03255	0.547636	-0.0720211	negligible
SM	SM(38:2)	10.233	8.30135	8.57005	9.17498	10.7282	17.4079	9.90347	7.71161	8.15305	9.38266	10.1154	17.5537	0.000950349	0.00305991	0.089998	medium	5.95138e-14	1.34135e-12	0.395162	large	0.979048	0.531489	-0.0749505	negligible	0.564181	6.74044e-09	-0.731674	large	0.762363	0.000704273	-0.428453	medium	0.439315	0.000704273	-1.09811	large	0.806004	0.000683497	-0.423069	medium	0.464463	0.000683497	-1.09053	large	0.927562	0.036007	-0.252726	small
SM	SM(38:3)	0.464643	0.42191	0.384899	0.304327	0.30704	3.65116	0.0339257	0.0335196	0.0336989	0.0325505	0.0345005	3.79183	0.862068	0.881228	-0.0166919	small	8.43259e-12	9.50288e-11	0.332058	large	0.983338	0.908413	-0.0137716	negligible	0.00894704	9.80263e-11	-0.827477	large	0.971566	0.676734	-0.0518068	negligible	0.00883993	0.676734	-0.86209	large	0.976764	0.549263	-0.0733167	negligible	0.00888722	0.549263	-0.891934	large	0.943477	0.319881	-0.119256	small
SM	SM(39:1)	7.06619	5.55443	5.903	7.2943	8.06726	10.9189	7.10157	5.49027	4.82772	7.63787	8.40407	10.1336	0.000454231	0.00160349	0.100052	medium	3.58145e-11	3.49788e-10	0.313568	large	0.845015	0.116278	-0.188731	small	0.700793	1.03778e-07	-0.665772	large	0.653287	0.000125366	-0.487508	medium	0.541787	0.000125366	-0.969981	large	0.57445	0.000383435	-0.44314	medium	0.476406	0.000383435	-0.909052	large	0.908829	0.229412	-0.144196	small
SM	SM(39:2)	1.69921	1.5255	1.39661	1.64897	1.6684	5.12415	1.61135	1.24205	1.1366	1.33777	1.33322	4.88145	0.446118	0.493255	-0.0017665	small	4.57949e-13	7.89289e-12	0.369206	large	1.20861	0.402314	0.100363	small	0.330095	8.6218e-11	-0.83029	large	0.931616	0.811207	-0.0296764	negligible	0.254442	0.811207	-0.977856	large	0.852524	0.33871	-0.117228	small	0.232841	0.33871	-1.06188	large	1.00342	0.637766	0.0563806	negligible
SM	SM(40:1)	11.7879	14.9358	11.2354	15.2403	17.5118	22.4853	7.88851	11.905	11.4732	13.5016	2.84852	18.2751	0.854218	0.878196	-0.0164077	small	0.0260675	0.0348757	0.0434851	small	2.76934	0.56034	-0.0697465	negligible	0.431654	0.00256457	-0.366131	medium	4.17937	0.73991	0.0412467	negligible	0.651434	0.73991	-0.255362	small	4.02777	0.703246	-0.0466218	negligible	0.627803	0.703246	-0.337019	medium	4.73989	0.75219	0.0378038	negligible
SM	SM(40:2)	28.2283	23.7743	25.1404	26.888	28.6523	51.6885	28.1737	23.7116	23.5739	27.6198	28.0996	48.0218	0.11947	0.162813	0.020552	small	4.48999e-13	7.89289e-12	0.369457	large	1.00264	0.861425	-0.0208971	negligible	0.586686	3.459e-10	-0.799574	large	0.843842	0.0371944	-0.260589	small	0.493767	0.0371944	-1.04996	large	0.838943	0.0607645	-0.230701	small	0.490901	0.0607645	-1.0183	large	0.982925	0.462299	-0.0880666	negligible
SM	SM(40:4)	9.62962	7.3214	8.06903	8.61428	7.57002	13.3762	9.51813	7.30289	8.06022	8.36082	6.61443	12.7854	0.0825483	0.122775	0.0262883	small	1.84989e-06	6.02241e-06	0.17328	large	1.43899	0.0139711	0.297013	small	0.744452	0.00253767	-0.36653	medium	1.10408	0.99265	-0.00114433	negligible	0.571189	0.99265	-0.691903	large	1.21858	0.37211	0.109343	small	0.630423	0.37211	-0.578986	large	1.26403	0.164834	0.166771	small
SM	SM(41:1)	16.8795	13.4494	14.1371	17.0403	19.2041	20.0732	15.7439	13.6617	13.0025	17.9971	18.7551	18.9083	9.57045e-05	0.000483473	0.121037	medium	9.28837e-06	2.64223e-05	0.152045	large	0.839448	0.0289207	-0.263452	small	0.832648	0.00546846	-0.336565	medium	0.728426	1.86847e-05	-0.547127	large	0.722525	1.86847e-05	-0.622885	large	0.693279	5.50778e-05	-0.506148	large	0.687664	5.50778e-05	-0.580475	large	0.959585	0.0846638	-0.207358	small
SM	SM(41:2)	15.851	13.1693	13.5075	15.4665	17.3551	21.1008	16.0113	12.6569	12.4988	15.8996	16.1015	21.1541	0.00364469	0.00962067	0.071455	medium	1.54607e-08	8.54713e-08	0.235551	large	0.994402	0.374712	-0.106392	small	0.756889	5.41125e-05	-0.495719	medium	0.786068	0.00167	-0.396539	medium	0.598316	0.00167	-0.781861	large	0.776253	0.00142493	-0.396492	medium	0.590844	0.00142493	-0.782413	large	0.987461	0.19967	-0.153915	small
SM	SM(42:1)	23.9698	21.8608	23.6627	25.5128	26.2837	21.3054	22.9913	21.4868	21.8882	25.0176	26.1299	20.3488	0.586661	0.622796	-0.00722206	small	0.355685	0.385984	0.00241275	small	0.879882	0.508561	-0.0791898	negligible	1.12986	0.113482	0.190202	small	0.822307	0.128	-0.189757	small	1.05593	0.128	0.0699962	negligible	0.837668	0.301739	-0.126569	small	1.07565	0.301739	0.129368	small	0.95743	0.715941	-0.0435691	negligible
SM	SM(42:2)	78.0819	67.297	77.4134	72.2607	77.9676	62.7634	81.0707	71.463	75.3683	67.2781	72.3807	60.9635	0.275521	0.332213	0.00689385	small	0.00121068	0.00216299	0.0866825	medium	1.12006	0.401658	0.100504	small	1.32982	0.000100471	0.476709	medium	0.987321	0.249131	-0.143461	small	1.17223	0.249131	0.223367	small	1.04128	0.702699	0.0467121	negligible	1.23628	0.702699	0.431662	medium	0.929503	0.456377	-0.0892378	negligible
SM	SM(42:3)	33.1776	30.7345	32.8826	31.8777	33.1739	32.9666	33.1974	31.7501	30.5994	29.5213	30.71	32.0218	0.969667	0.972988	-0.0213685	small	0.969692	0.973013	-0.02137	small	1.081	0.598005	0.0631455	negligible	1.03671	0.992206	-0.00116936	negligible	1.03387	0.988456	0.00179742	negligible	0.991516	0.988456	-0.0598979	negligible	0.9964	0.668695	0.0523768	negligible	0.955581	0.668695	-0.01191	negligible	0.961293	0.988309	0.00175404	negligible
SM	SM(43:1)	7.811	4.0303	6.49626	6.46751	8.66784	8.74127	5.29378	3.32139	4.73107	5.09931	6.50386	7.89389	0.00181986	0.00538604	0.0810785	medium	0.000260497	0.000545184	0.107576	medium	0.813945	0.364039	-0.108797	small	0.670618	0.105564	-0.194529	small	0.51068	6.66464e-05	-0.507852	large	0.420755	6.66464e-05	-0.596825	large	0.727425	0.120314	-0.19079	small	0.599333	0.120314	-0.280878	small	0.784043	0.283844	-0.128522	small
SM	SM(44:1)	1.68611	0.986637	1.42916	1.42088	1.84619	2.20386	1.36137	0.870167	1.14672	1.24599	1.48603	2.14567	0.000600447	0.00204571	0.0962607	medium	1.24259e-06	4.1848e-06	0.178495	large	0.916109	0.236457	-0.142028	small	0.634473	0.00340265	-0.355305	medium	0.585564	1.21283e-05	-0.560025	large	0.405546	1.21283e-05	-0.772855	large	0.771666	0.0516652	-0.2395	small	0.534436	0.0516652	-0.454106	medium	0.838468	0.0615548	-0.225007	small
SM	SM(44:2)	1.57927	1.49833	1.32605	1.44487	1.60016	2.01036	1.3394	1.55304	1.39998	1.46161	1.37476	1.93154	0.863182	0.881228	-0.0167325	small	0.109312	0.133451	0.0219439	small	0.974279	0.858195	0.0213894	negligible	0.693436	0.12079	-0.186416	small	1.12968	0.974674	0.00394386	negligible	0.804042	0.974674	-0.20716	small	1.01835	0.401976	-0.10266	small	0.724803	0.401976	-0.318094	medium	1.06317	0.774616	-0.0342817	negligible
Hexoses	H1	7673.7	6342.44	7781	7617.36	6009.48	7584.97	7502.69	6334.74	7267.15	7397.48	5687.84	6899.55	7.38425e-08	1.45131e-06	0.215293	large	0.00389576	0.00613687	0.0705264	medium	1.31907	1.02638e-07	0.666046	large	1.08742	0.197233	0.154758	small	1.11373	0.181095	0.1666	small	0.918138	0.181095	-0.297854	small	1.27766	6.20144e-06	0.570929	large	1.05328	6.20144e-06	0.0742877	negligible	1.30058	5.39559e-07	0.624022	large
Total	Acylcarnitines	118.709	102.364	109.324	109.714	101.474	114.912	123.438	97.6514	110.347	105.89	100.779	111.768	0.0619558	0.0975971	0.0306541	small	0.134999	0.160141	0.0186227	small	1.22485	0.00774891	0.322288	medium	1.10441	0.600996	0.0626298	negligible	0.968971	0.881935	0.0184502	negligible	0.873694	0.881935	-0.239915	small	1.09495	0.202762	0.156242	small	0.987286	0.202762	-0.116056	small	1.05072	0.177861	0.161744	small
Total	Diglicerides	103.258	92.1143	107.778	103.951	130.223	138.315	100.971	91.9037	97.6288	97.1455	112.759	125.628	0.00679819	0.0155615	0.062723	medium	0.000772895	0.00144241	0.092821	medium	0.895458	0.00798413	-0.321042	medium	0.803726	0.0011341	-0.396118	medium	0.815048	0.0004118	-0.447427	medium	0.731553	0.0004118	-0.514118	large	0.865822	0.0184929	-0.290719	small	0.777125	0.0184929	-0.359512	medium	0.861535	0.00518035	-0.338742	medium
Total	Triglicerides	1690.94	1359.24	1707.69	1699.15	2114.79	1725.49	1656.85	1360.63	1480.45	1611.72	1813.14	1454.3	0.0478362	0.0796364	0.0345355	small	0.390292	0.421976	0.000727457	small	0.913802	0.117246	-0.188229	small	1.13928	0.925252	-0.0112311	negligible	0.750425	0.0019487	-0.390632	medium	0.935592	0.0019487	-0.207749	small	0.816511	0.112654	-0.194864	small	1.01799	0.112654	-0.00586826	negligible	0.888908	0.128078	-0.182816	small
Total	Lysophosphatidylcholines	175.132	140.496	178.606	187.429	251.593	317.896	163.475	143.249	164.238	183.361	248.6	304.139	6.60317e-10	4.83682e-08	0.276197	large	2.10601e-15	6.85624e-14	0.43757	large	0.657582	1.64605e-07	-0.65426	large	0.537501	5.30225e-14	-0.985673	large	0.576224	4.81453e-13	-0.976001	large	0.470999	4.81453e-13	-1.32638	large	0.660651	2.98534e-07	-0.653365	large	0.540009	2.98534e-07	-0.984045	large	0.737577	1.19789e-05	-0.540008	large
Total	Phosphatidylcholines	2458.75	1981.73	2168.76	2303.67	2402.04	2387.96	2433.92	2056.87	2111.43	2245.3	2284.56	2299.35	0.00460178	0.0116235	0.0682003	medium	0.0061254	0.00934762	0.0641897	medium	1.06538	0.493517	0.0820263	negligible	1.05852	0.494443	0.0818504	negligible	0.900334	0.00514039	-0.351851	medium	0.894543	0.00514039	-0.341301	medium	0.92422	0.0534923	-0.237634	small	0.918275	0.0534923	-0.232738	small	0.982817	0.501603	-0.080496	negligible
Total	Sphingomyelins	510.488	445.058	474.121	491.824	527.163	591.502	499.846	447.714	464.388	475.308	502.897	577.152	0.144257	0.187854	0.0175676	small	8.95322e-05	0.000211556	0.12193	medium	0.993933	0.84796	-0.0229519	negligible	0.866057	0.00922277	-0.314978	medium	0.89027	0.0305796	-0.270595	small	0.775731	0.0305796	-0.570877	large	0.923425	0.100589	-0.201754	small	0.80462	0.100589	-0.504269	large	0.945139	0.267668	-0.132942	small
Total	Ceramides	8.42753	7.02674	7.71247	8.06668	9.05587	8.54974	8.04944	7.19579	7.01612	8.29597	8.3493	8.26814	0.0146832	0.0296703	0.051782	small	0.0492342	0.0638302	0.0341055	small	0.964086	0.414905	-0.0976971	negligible	0.973549	0.768926	-0.0351723	negligible	0.861844	0.00188302	-0.39195	medium	0.870303	0.00188302	-0.324704	medium	0.840325	0.0124342	-0.308824	medium	0.848574	0.0124342	-0.239765	small	0.993614	0.160045	-0.168694	small
Total	Cholesteryl Esters	10884.5	8524	9226.2	9459.87	10959.6	11233.3	10743.5	8964.42	9051.62	9011.07	11075.1	11224.3	0.0010457	0.00333034	0.0886898	medium	0.000544165	0.00107007	0.0975991	medium	0.970063	0.729059	-0.0414717	negligible	0.957167	0.573085	-0.06749	negligible	0.809423	0.000548758	-0.437351	medium	0.798662	0.000548758	-0.466638	medium	0.817296	0.00574349	-0.341991	medium	0.806431	0.00574349	-0.369367	medium	0.813634	0.0092048	-0.315061	medium
Total	Lipids	15950.2	12652	13980.2	14363.7	16496	16518	15422.3	13148	13673.4	13990.6	15693.5	16041.4	0.000324999	0.00119031	0.104587	medium	0.000504608	0.000999696	0.0986245	medium	0.982716	0.438973	-0.0927309	negligible	0.961406	0.504367	-0.0799761	negligible	0.837795	5.46654e-05	-0.514112	large	0.819628	5.46654e-05	-0.499119	medium	0.871278	0.0021597	-0.380845	medium	0.852384	0.0021597	-0.36434	medium	0.891487	0.0103567	-0.31004	medium
[truncated: 4 more columns]

## Sheet: Table S4
Table S4. Concentrations of components of the hypothetical serum “multi-cancer signature”; shown are median and [minimum-maximum] concentrations in µM (only the most abundand LPCs are presented).
	Ctr_P	Ctr_N	BC	CC	HC	LC
	(n=95)	(n=112)	(n=112)	(n=30)	(n=32)	(n=35)
Ala	436.7	405.7	331.1	310.3	361.8	337.2
	[229.0-658.9]	[245.5-699.4]	[191.8-670.9]	[133.5-478.2]	[220.4-619.2]	[195.6-504.4]
Asp	36.4	40.5	17.6	18.5	21.9	19.3
	[5.5-94.6]	[25.2-67.2]	[1.7-44.2]	[6.9-44.1]	[8.9-62.2]	[12.7-51.7]
Glu	127.1	101.2	50.9	58.3	63.3	62.5
	[45.9-240.9]	[56.9-371.1]	[22.2-107.7]	[26.9-234.9]	[21.7-151.5]	[25.4-136.2]
His	100.2	97.30	82.6	73.3	81.0	81.3
	[64.6-153.5]	[62.8-154.3]	[63.3-112.7]	[33.4-103.7]	[51.1-106.5]	[38.1-129.5]
Phe	85.9	108.4	61.4	62.2	68.7	74.6
	[57.5-133.6]	[56.7-193.9]	[38.1-99.1]	[33.5-102.8]	[46.4-133.6]	[41.8-118.0]
Leu+Ile	208.6	201.1	161.1	162.3	186.4	185.7
	[106.5-265.6]	[123.4-364.2]	[93.0-265.6]	[91.8-485.9]	[116.4-346.9]	[109.8-391.1]
DG(34:3)	3.54	4.40	1.93	2.23	2.42	2.14
	[0.04-11.19]	[0.04-13.72]	[0.03-7.41]	[0.03-5.32]	[0.03-5.90]	[0.05-5.83]
DG(36:4)	6.56	6.14	4.11	4.66	3.84	4.31
	[2.64-19.57]	[1.53-21.79]	[1.22-14.08]	[0.75-9.65]	[1.84-8.73]	[1.21-18.24]
TG(44:2)	2.00	2.12	1.06	1.10	1.12	1.48
	[0.10-14.37]	[0.08-11.04]	[0.02-10.15]	[0.17-5.02]	[0.07-5.02]	[0.09-7.89]
TG(46:2)	6.44	4.92	2.16	1.27	2.04	3.55
	[0.13-36.42]	[0.04-40.10]	[0.07-43.10]	[0.07-10.4]	[0.11-17.11]	[0.12-20.31]
LPC(16:0)	83.1	96.6	57.4	50.4	58.0	58.1
	[43.6-149.2]	[42.7-211.6]	[30.9-97.6]	[17.8-91.4]	[33.3-157.2]	[34.7-101.5]
LPC(18:0)	53.1	68.6	37.6	29.7	32.6	38.6
	[26.7-105.2]	[23.9-164.4]	[16.9-71.3]	[8.1-60.2]	[17.2-95.5]	[17.0-72.4]
LPC(18:1)	34.0	39.2	26.2	19.9	25.4	30.2
	[14.7-62.7]	[18.2-78.2]	[11.3-58.1]	[7.6-34.6]	[14.1-47.3]	[16.2-51.7]

## Sheet: Table S5
Table S5. Differences in serum metabolites between patients diagnosed with breast cancer (BC) and healthy women (Ctr_P and Ctr_N) in two age-defined subcohorts (<50 years and ≥50 years)
Metabolite class	Compound	Concentration [µM] - mean value						Concentration [µM] - median value						BC/Ctr_P Fold-Change (median)		BC/Ctr_N Fold-Change (median)		BC vs. Ctr_P <50 years				BC vs. Ctr_P ≥50 years				BC vs. Ctr_N <50 years				BC vs. Ctr_N ≥50 years
		BC		Ctr_P		Ctr_N		BC		Ctr_P		Ctr_N
		<50 years	≥50years	<50 years	≥50years	<50 years	≥50years	<50 years	≥50years	<50 years	≥50years	<50 years	≥50years	<50 years	≥50years	<50 years	≥50years	p-value	FDR	effect size (r)	effect	p-value	FDR	effect size (r)	effect	p-value	FDR	effect size (r)	effect	p-value	FDR	effect size (r)	effect
AC	AC(0:0)	33.6025	42.9786	38.8044	43.8862	38.8945	42.1934	32.7959	41.4393	37.5626	41.3372	38.6696	42.5828	0.873102	1.00247	0.848105	0.973148	0.00469536	0.0140382	-0.279	small	0.65748	0.767497	-0.0434	negligible	0.000556772	0.00152462	-0.323	medium	0.914294	0.926948	-0.0103	negligible
AC	AC(2:0)	9.62945	12.5576	7.81624	9.11418	7.12223	8.09234	9.50808	11.8698	6.63927	8.28486	6.38801	7.17774	1.4321	1.43271	1.48843	1.6537	0.00104746	0.00388487	0.323	medium	6.0326e-06	6.79827e-05	0.444	medium	6.92141e-05	0.000235811	0.373	medium	4.47665e-09	4.09893e-08	0.56	large
AC	AC(3:0)	49.9517	57.9404	48.0854	48.4139	55.9092	56.1078	44.4178	58.4021	45.0464	44.574	55.9909	55.372	0.986045	1.31023	0.793304	1.05472	0.889416	0.924109	0.0137	negligible	0.0118387	0.0403342	0.247	small	0.093396	0.152028	-0.157	small	0.733246	0.795707	0.0325	negligible
AC	AC(3:0-DC)	0.00647738	0.00773378	0.00712941	0.00650174	0.00740155	0.00701153	0.00626687	0.00685868	0.00692777	0.006154	0.0069447	0.00674732	0.904601	1.11451	0.902397	1.0165	0.333701	0.474634	-0.0953	negligible	0.114571	0.217983	0.155	small	0.0654554	0.116233	-0.172	small	0.52232	0.612159	0.061	negligible
AC	AC(3:0-OH)	0.0469759	0.0504573	0.042425	0.0409665	0.0510583	0.0520663	0.0487894	0.0521429	0.0405953	0.0426051	0.0520057	0.0544501	1.20185	1.22387	0.938156	0.957627	0.0219656	0.0554821	0.226	small	0.000589623	0.0035257	0.337	medium	0.0688392	0.119356	-0.17	small	0.549894	0.636836	-0.057	negligible
AC	AC(3:1)	0.0178318	0.0164201	0.0133127	0.0192274	0.0200427	0.0194806	0.0136794	0.0138609	0.0130159	0.0144663	0.0142227	0.0157214	1.05097	0.958155	0.961799	0.881658	0.304759	0.448716	0.101	small	0.638727	0.748588	0.046	negligible	0.302264	0.386739	-0.0965	negligible	0.190384	0.254714	-0.125	small
AC	AC(4:0)	0.131023	0.180471	0.124407	0.125022	0.125802	0.174932	0.0717328	0.107305	0.102718	0.0983341	0.0798774	0.131397	0.698347	1.09123	0.898036	0.816647	0.591742	0.696307	-0.0528	negligible	0.302896	0.43292	0.101	small	0.482156	0.558386	-0.0658	negligible	0.309412	0.387426	-0.0973	negligible
AC	AC(4:1)	0.0206974	0.0242144	0.0197593	0.0196836	0.0232533	0.0249948	0.0180441	0.0229624	0.0164622	0.0169716	0.0216353	0.0233282	1.09609	1.35299	0.834013	0.984321	0.298563	0.444055	0.102	small	0.0217196	0.0623905	0.226	small	0.139043	0.211086	-0.139	small	0.885895	0.904416	-0.0137	negligible
AC	AC(5:0)	0.145272	0.215323	0.161541	0.190779	0.229965	0.29132	0.142701	0.183979	0.136759	0.180626	0.204635	0.244261	1.04345	1.01856	0.697345	0.753206	0.957756	0.967665	0.00522	negligible	0.256556	0.393767	0.111	small	0.00147389	0.00369102	-0.298	small	0.00442628	0.00876284	-0.272	small
AC	AC(5:0-DC)	0.143431	0.153756	0.137678	0.143151	0.21558	0.235197	0.139495	0.149592	0.120753	0.145889	0.204407	0.229951	1.15521	1.02538	0.682439	0.650541	0.15267	0.263131	0.141	small	0.259299	0.393767	0.111	small	1.74963e-09	1.55346e-08	-0.564	large	4.78226e-12	6.3691e-11	-0.659	large
AC	AC(5:0-OH)	0.00968903	0.0117084	0.0100427	0.012295	0.0111269	0.0122334	0.00954642	0.0101042	0.00956727	0.0124604	0.0109957	0.0129253	0.997821	0.810905	0.868192	0.781733	0.910375	0.935929	0.0111	negligible	0.51857	0.654935	-0.0633	negligible	0.0162473	0.0340033	-0.225	small	0.253428	0.322845	-0.109	small
AC	AC(5:1)	0.0225004	0.0316943	0.0203185	0.0262842	0.0254012	0.030994	0.0231804	0.0280902	0.0221292	0.0223067	0.0234881	0.0277835	1.0475	1.25927	0.9869	1.01104	0.330371	0.472232	0.0959	negligible	0.0173095	0.0528418	0.233	small	0.340951	0.4251	-0.0892	negligible	0.454812	0.541707	0.0712	negligible
AC	AC(6:0)	0.0619549	0.0826539	0.045927	0.0572107	0.0451831	0.0576328	0.0581696	0.07715	0.0443855	0.0524864	0.0441162	0.0530538	1.31055	1.46991	1.31855	1.45418	0.00732753	0.0204473	0.264	small	5.74112e-05	0.000525671	0.394	medium	0.000209801	0.000661007	0.347	medium	9.44212e-07	4.19173e-06	0.467	medium
AC	AC(7:0)	0.0109726	0.0137372	0.00875065	0.00953317	0.0452624	0.0463555	0.00505549	0.00545766	0.0052656	0.00492832	0.0259144	0.0334159	0.960098	1.10741	0.195084	0.163325	0.791129	0.851447	-0.0261	negligible	0.117596	0.222295	0.153	small	3.7242e-11	4.74559e-10	-0.619	large	3.61266e-07	1.70727e-06	-0.485	medium
AC	AC(8:0)	0.187286	0.214243	0.121874	0.140984	0.09182	0.127088	0.148196	0.185233	0.103866	0.10828	0.095656	0.115734	1.4268	1.71068	1.54926	1.60051	0.000751232	0.00293481	0.332	medium	0.000143849	0.00103026	0.373	medium	5.75566e-07	3.12298e-06	0.468	medium	6.35425e-06	2.3567e-05	0.43	medium
AC	AC(8:1)	0.172301	0.243942	0.158438	0.187794	0.155977	0.174854	0.148383	0.22997	0.125599	0.166291	0.140266	0.158673	1.18141	1.38294	1.05787	1.44933	0.213215	0.337687	0.122	small	0.00348692	0.0152488	0.286	small	0.324015	0.409209	0.0923	negligible	0.000318905	0.000791858	0.343	medium
AC	AC(10:0)	0.291612	0.335259	0.167075	0.207247	0.128298	0.175184	0.241771	0.287759	0.131067	0.160514	0.115325	0.153731	1.84463	1.79274	2.09644	1.87183	9.15786e-06	9.58305e-05	0.437	medium	5.01004e-06	6.11643e-05	0.447	medium	3.26001e-10	3.41136e-09	0.589	large	3.23232e-09	3.05507e-08	0.564	large
AC	AC(10:1)	0.0674099	0.0906109	0.0549771	0.0682699	0.0581619	0.0684041	0.0604649	0.0777604	0.0417231	0.0589286	0.0537896	0.0583216	1.4492	1.31957	1.1241	1.3333	0.0201242	0.0521823	0.229	small	0.0195756	0.058527	0.228	small	0.1087	0.170316	0.15	small	0.00979444	0.0179361	0.246	small
AC	AC(10:2)	0.0182361	0.0264711	0.0193009	0.0207499	0.0228164	0.0292314	0.0179671	0.0220747	0.016514	0.0171286	0.018504	0.0234222	1.08799	1.28876	0.970985	0.942469	0.407849	0.55069	0.0816	negligible	0.0105788	0.0378	0.251	small	0.514505	0.586576	-0.0611	negligible	0.697536	0.768343	-0.0371	negligible
AC	AC(10:3)	0.0565164	0.0826166	0.0576707	0.0679476	0.0545823	0.0621699	0.0506888	0.0784867	0.0583785	0.0633181	0.0499814	0.056256	0.868278	1.23956	1.01415	1.39517	0.796232	0.851447	-0.0254	negligible	0.0586281	0.127245	0.185	small	0.346754	0.430504	0.0881	negligible	0.0210019	0.0357765	0.22	small
AC	AC(12:0)	0.0805592	0.0981638	0.0500565	0.0661444	0.045296	0.0689619	0.0741663	0.0880655	0.038699	0.0597867	0.0425369	0.0593527	1.91649	1.473	1.74357	1.48377	1.44522e-05	0.000141149	0.428	medium	0.000207122	0.00137924	0.364	medium	4.0361e-07	2.27419e-06	0.475	medium	0.00025295	0.000644473	0.349	medium
AC	AC(12:1)	0.106153	0.134661	0.0628563	0.0870733	0.058998	0.0825254	0.104033	0.118304	0.0510139	0.0794817	0.0536813	0.0692899	2.03931	1.48845	1.93798	1.70738	3.04165e-06	3.56659e-05	0.46	medium	2.50351e-06	3.493e-05	0.462	medium	7.92252e-09	6.44805e-08	0.54	large	3.41415e-08	2.08405e-07	0.526	large
AC	AC(13:0)	0.0301874	0.0533428	0.0382272	0.0549773	0.139515	0.243641	0.0303033	0.0403706	0.035646	0.0451239	0.103179	0.196687	0.850116	0.894663	0.293695	0.205254	0.1705	0.285465	-0.135	small	0.552934	0.677865	-0.0581	negligible	1.63674e-18	1.19891e-16	-0.822	large	7.63632e-16	2.23744e-14	-0.768	large
AC	AC(14:0)	0.0266996	0.0338585	0.0242168	0.0287975	0.0259689	0.0371936	0.0261836	0.0314522	0.0217434	0.0245672	0.0251561	0.0346468	1.20421	1.28025	1.04084	0.907793	0.0582592	0.128345	0.186	small	0.00859162	0.0326995	0.258	small	0.816231	0.866506	0.0217	negligible	0.186367	0.251638	-0.126	small
AC	AC(14:0-OH)	0.0071119	0.00934275	0.00556836	0.00828365	0.00466524	0.00792731	0.00582817	0.0114358	0.00176263	0.00709989	0.00181823	0.00860526	3.30652	1.6107	3.20542	1.32893	0.327119	0.472148	0.0966	negligible	0.870504	0.927483	0.016	negligible	0.0901221	0.147518	0.158	small	0.16906	0.230393	0.132	small
AC	AC(14:1)	0.130166	0.159832	0.0734906	0.10343	0.0676489	0.094334	0.124864	0.14622	0.0614663	0.0917355	0.0627071	0.0834408	2.03142	1.59393	1.99123	1.75238	2.8763e-07	4.68198e-06	0.505	large	7.971e-07	1.45969e-05	0.484	medium	6.96688e-10	7.03895e-09	0.578	large	3.41415e-08	2.08405e-07	0.526	large
AC	AC(14:2)	0.0308322	0.041584	0.0191795	0.0250841	0.0166372	0.0231051	0.030091	0.0372958	0.011101	0.0222321	0.00561458	0.0127407	2.71066	1.67757	5.35944	2.92731	0.00509846	0.0150894	0.276	small	0.000303366	0.0018912	0.354	medium	9.86184e-05	0.000332128	0.364	medium	2.5613e-05	8.1572e-05	0.401	medium
AC	AC(16:0)	0.111354	0.133977	0.114554	0.124067	0.0829519	0.0999623	0.111763	0.129962	0.108571	0.120758	0.0853683	0.0968208	1.0294	1.07622	1.30919	1.3423	0.989434	0.992823	0.0013	negligible	0.103074	0.204058	0.16	small	9.68871e-09	7.67241e-08	0.538	large	3.7804e-08	2.26052e-07	0.524	large
AC	AC(16:1)	0.0293661	0.0414531	0.0203161	0.0287993	0.0165108	0.0285728	0.0283226	0.0376651	0.0176171	0.0252444	0.0158861	0.0250126	1.60767	1.49201	1.78286	1.50584	0.000208973	0.00117786	0.366	medium	2.6776e-05	0.000280191	0.412	medium	1.62505e-06	7.93566e-06	0.45	medium	2.56087e-05	8.1572e-05	0.401	medium
AC	AC(18:0)	0.040248	0.0494648	0.0450138	0.0539603	0.0383825	0.0438511	0.0375252	0.0443952	0.044612	0.04946	0.0394607	0.0417247	0.841145	0.897599	0.950951	1.064	0.187632	0.303744	-0.13	small	0.187783	0.314416	-0.129	small	0.829465	0.871088	-0.0201	negligible	0.347867	0.430064	0.0895	negligible
AC	AC(18:1)	0.168373	0.205044	0.169192	0.1965	0.109176	0.12768	0.170848	0.202629	0.162821	0.194104	0.103415	0.120287	1.0493	1.04392	1.65206	1.68454	0.926145	0.948813	0.00913	negligible	0.469202	0.608302	0.071	negligible	1.65435e-11	2.30821e-10	0.63	large	3.55707e-12	5.21111e-11	0.663	large
AC	AC(18:2)	0.060008	0.0695115	0.0829563	0.0879839	0.0587316	0.0565198	0.0607712	0.0705793	0.0809515	0.0849572	0.0544095	0.0582873	0.750712	0.830764	1.11692	1.21089	9.28302e-07	1.23633e-05	-0.484	medium	0.00061859	0.00355469	-0.335	medium	0.206238	0.291921	0.118	small	0.000924737	0.00213345	0.316	medium
AA	Ala	331.686	354.998	435.571	435.363	386.029	425.24	334.25	330.456	453.618	419.377	373.451	446.603	0.736853	0.787968	0.89503	0.739931	3.61327e-08	9.1603e-07	-0.543	large	1.99975e-06	3.18469e-05	-0.466	medium	0.000714833	0.00190405	-0.317	medium	1.17215e-05	4.18829e-05	-0.418	medium
AA	Arg	97.8676	107.252	98.0271	100.062	151.373	161.928	93.8706	107.149	92.5975	101.21	142.24	162.316	1.01375	1.05867	0.659946	0.660125	0.474557	0.617979	0.0705	negligible	0.145925	0.265565	0.142	small	2.6164e-06	1.21684e-05	-0.44	medium	1.8402e-08	1.25391e-07	-0.537	large
AA	Asn	46.1992	44.1458	61.0774	61.9776	56.5074	55.0172	45.5462	44.4468	59.59	61.814	56.3725	53.7247	0.764327	0.719042	0.807951	0.827307	1.16635e-09	4.88199e-08	-0.599	large	1.42594e-11	1.0445e-09	-0.663	large	1.97962e-06	9.35528e-06	-0.446	medium	8.21996e-09	6.17551e-08	-0.549	large
AA	Asp	17.4075	19.7009	36.0609	40.2727	39.5586	44.4065	16.7937	18.1882	35.5766	40.2873	37.4454	43.8319	0.472043	0.451462	0.448484	0.414952	2.52774e-15	5.65986e-13	-0.779	large	2.39095e-12	3.50274e-10	-0.687	large	1.82114e-19	5.33594e-17	-0.845	large	6.24732e-18	3.66093e-16	-0.823	large
AA	Cit	25.9348	30.8783	27.9212	31.7098	27.8065	31.8263	26.0506	29.2877	28.9025	28.7177	26.4338	29.9349	0.90133	1.01985	0.985506	0.978377	0.132841	0.238788	-0.148	small	0.958398	0.973563	-0.00512	negligible	0.582456	0.656383	-0.0515	negligible	0.56193	0.643147	-0.0553	negligible
AA	Gln	648.498	671.621	619.265	639.137	667.211	655.643	635.926	663.343	610.255	643.308	667.771	658.781	1.04207	1.03114	0.952312	1.00693	0.099217	0.190004	0.163	small	0.105858	0.205408	0.159	small	0.233931	0.314412	-0.111	small	0.64953	0.726383	0.0433	negligible
AA	Glu	46.0333	59.8791	117.727	133.734	98.1229	125.794	46.4628	60.4385	112.004	140.205	89.8961	118.219	0.414832	0.431071	0.51685	0.511243	3.86339e-15	5.65986e-13	-0.774	large	2.89543e-14	8.48362e-12	-0.745	large	1.33823e-18	1.19891e-16	-0.824	large	6.02131e-17	2.20531e-15	-0.797	large
AA	Gly	297.945	274.474	327.597	366.046	366.371	350.022	279.655	257.24	301.703	352.499	361.286	334.42	0.926923	0.729759	0.774055	0.76921	0.0913358	0.17961	-0.167	small	7.98241e-05	0.000668271	-0.386	medium	2.07461e-05	8.21434e-05	-0.399	medium	1.27823e-06	5.35061e-06	-0.461	medium
AA	His	83.0988	82.5915	100.856	97.8652	99.7857	98.0385	81.9524	82.993	101.277	99.9126	100.108	94.6361	0.809191	0.830656	0.818639	0.87697	6.55874e-08	1.47824e-06	-0.532	large	1.03334e-07	2.16263e-06	-0.522	large	1.02464e-07	6.12692e-07	-0.498	medium	1.34556e-08	9.8562e-08	-0.542	large
AA	Lys	151.889	161.002	175.225	190.709	160.951	172.708	150.387	161.69	168.667	191.592	158.799	170.963	0.891623	0.84393	0.94703	0.945761	0.000619035	0.0025911	-0.337	medium	8.81046e-07	1.51851e-05	-0.482	medium	0.163212	0.23911	-0.13	small	0.0604562	0.0922595	-0.179	small
AA	Met	22.0183	20.9317	26.7765	27.4196	25.3519	25.1531	22.2702	20.3967	25.8815	27.3952	24.1212	24.9539	0.860467	0.744537	0.923262	0.817376	0.00107229	0.00392726	-0.322	medium	2.42748e-09	7.9028e-08	-0.585	large	0.0170208	0.0353694	-0.224	small	4.66514e-05	0.000139478	-0.388	medium
AA	Orn	73.0066	86.8809	126.045	142.665	83.1957	91.8686	72.3405	86.6505	127.922	146.915	80.6691	87.962	0.565507	0.5898	0.896757	0.985089	3.94877e-12	2.89248e-10	-0.684	large	3.9669e-11	2.32461e-09	-0.648	large	0.0259104	0.0512955	-0.209	small	0.295397	0.371465	-0.1	small
AA	Phe	60.0463	64.8698	84.9415	87.8046	103.76	114.711	59.7249	63.5749	82.1689	86.9266	100.962	114.65	0.726855	0.731364	0.59156	0.554511	3.42279e-13	3.34293e-11	-0.717	large	1.03963e-11	1.01537e-09	-0.667	large	1.14968e-18	1.19891e-16	-0.826	large	1.42635e-18	2.72635e-16	-0.839	large
AA	Pro	153.328	161.475	190.77	198.868	207.001	219.679	150.562	163.103	184.009	191.009	202.682	207.503	0.818234	0.853906	0.742851	0.786027	0.000406721	0.00183337	-0.349	medium	0.000212496	0.00138359	-0.363	medium	9.04259e-08	5.51975e-07	-0.5	large	2.31649e-07	1.11267e-06	-0.493	medium
AA	Ser	132.892	126.354	162.38	163.263	183.301	174.263	130.078	119.97	165.392	166.78	186.654	172.144	0.786483	0.71933	0.696895	0.696917	5.39643e-06	6.08136e-05	-0.448	medium	1.28014e-07	2.50054e-06	-0.518	large	2.77349e-12	4.51463e-11	-0.655	large	1.53562e-11	1.87513e-10	-0.643	large
AA	Thr	118.6	113.97	140.118	140.416	136.321	126.492	115.603	112.087	138.556	142.566	139.169	123.532	0.834336	0.78621	0.830662	0.907353	0.00185862	0.00648305	-0.306	medium	3.54993e-06	4.72787e-05	-0.455	medium	0.0138953	0.0297177	-0.23	small	0.0118277	0.0213921	-0.24	small
AA	Trp	56.4277	56.6254	63.8346	65.0244	65.5061	66.0605	55.3668	56.2941	60.8851	63.849	63.6403	65.4643	0.909365	0.881675	0.869996	0.85992	0.00148222	0.00529621	-0.313	medium	6.77534e-05	0.000601568	-0.39	medium	2.41396e-05	9.43053e-05	-0.395	medium	3.33175e-05	0.000102758	-0.396	medium
AA	Tyr	55.4781	62.7544	67.1672	74.1606	73.185	78.7397	54.8115	61.9687	66.1151	73.072	72.6232	76.2921	0.829031	0.848049	0.754739	0.812255	0.000449457	0.00199532	-0.346	medium	4.34438e-05	0.000410614	-0.401	medium	1.6804e-07	9.84712e-07	-0.49	medium	1.67004e-05	5.68978e-05	-0.41	medium
AA	Val	185.86	202.167	217.538	226.077	220.816	230.077	182.18	203.876	211.319	219.778	211.496	225.387	0.862109	0.927647	0.861391	0.90456	0.000277936	0.00150835	-0.359	medium	0.00456202	0.0190953	-0.278	small	3.339e-05	0.000127055	-0.389	medium	0.00628614	0.01196	-0.26	small
AA	xLeu	159.485	166.171	214.118	224.507	204.79	219.856	157.126	168.754	207.07	219.833	195.355	216.931	0.758808	0.767646	0.804312	0.777916	1.39211e-08	4.07889e-07	-0.559	large	8.4716e-10	3.54597e-08	-0.602	large	1.10722e-08	8.53724e-08	-0.535	large	2.42505e-08	1.54465e-07	-0.532	large
BA	ADMA	0.475766	0.516214	0.487709	0.54547	0.464739	0.49374	0.470349	0.50616	0.462808	0.539017	0.462724	0.502273	1.0163	0.939043	1.01648	1.00774	0.569073	0.6778	-0.0561	negligible	0.00963535	0.0357362	-0.254	small	0.329608	0.414485	0.0913	negligible	0.372987	0.455356	0.085	negligible
BA	Creatinine	62.2688	66.2139	61.3716	67.9145	62.2398	66.4561	62.9253	65.5304	59.5967	67.2248	62.2162	63.6711	1.05585	0.974795	1.0114	1.0292	0.482779	0.623146	0.0692	negligible	0.774187	0.862497	-0.0281	negligible	0.755236	0.825687	-0.0292	negligible	0.742267	0.799574	0.0314	negligible
BA	Kynurenine	1.70947	2.03191	1.74237	2.18823	1.83325	2.14956	1.66365	1.95519	1.73737	2.10293	1.76171	2.09733	0.957571	0.929743	0.944339	0.932229	0.755652	0.835497	-0.0306	negligible	0.0963658	0.196028	-0.163	small	0.266593	0.351855	-0.104	small	0.152999	0.21347	-0.136	small
BA	Met-SO	0.743338	0.688562	1.0141	1.11857	1.68564	1.78272	0.732059	0.668364	0.97673	1.06534	1.2404	1.41847	0.7495	0.627373	0.590182	0.471187	0.000406706	0.00183337	-0.349	medium	4.16412e-08	9.38529e-07	-0.537	large	3.82878e-12	5.90438e-11	-0.65	large	1.10812e-17	5.41131e-16	-0.816	large
BA	Putrescine	0.195529	0.226514	0.141195	0.162463	0.117365	0.105593	0.208524	0.216155	0.154547	0.146775	0.11727	0.0848389	1.34926	1.4727	1.77816	2.54783	0.000472313	0.00206549	0.345	medium	8.8978e-05	0.000724182	0.384	medium	1.02979e-06	5.29347e-06	0.458	medium	1.53595e-11	1.87513e-10	0.643	large
BA	Sarcosine	1.21449	1.17408	1.24927	1.26327	1.16586	1.23139	0.984446	1.14007	1.071	1.23854	1.18954	1.26338	0.919186	0.920497	0.827583	0.902395	0.360865	0.503492	-0.0901	negligible	0.378711	0.511348	-0.0863	negligible	0.284052	0.369899	-0.1	small	0.570021	0.647351	-0.0542	negligible
BA	SDMA	0.476573	0.526269	0.435847	0.493601	0.441968	0.501861	0.469939	0.514228	0.434155	0.482296	0.437759	0.488389	1.08242	1.06621	1.07351	1.05291	0.00718428	0.0202403	0.265	small	0.138831	0.254234	0.145	small	0.0132513	0.0285488	0.232	small	0.172806	0.234408	0.13	small
BA	Serotonin	0.643673	0.55084	0.529934	0.47384	0.696003	0.542413	0.5584	0.5372	0.527243	0.439561	0.715134	0.517049	1.0591	1.22213	0.780833	1.03897	0.15845	0.269919	0.139	small	0.0739991	0.157114	0.176	small	0.0688437	0.119356	-0.17	small	0.792487	0.8413	0.0251	negligible
BA	t4-OH-Pro	9.08528	11.5159	13.3253	14.5423	10.0426	11.6666	8.97926	9.84897	10.1002	12.7018	9.20273	10.1774	0.889016	0.775397	0.975717	0.967731	0.0352466	0.0832843	-0.208	small	0.0030733	0.0136436	-0.29	small	0.156479	0.233921	-0.133	small	0.801719	0.848027	-0.0239	negligible
BA	Taurine	142.026	141.35	157.537	148.225	127.135	133.199	143.138	139.702	157.962	146.32	128.493	130.839	0.906156	0.954767	1.11397	1.06773	0.0204628	0.0525929	-0.229	small	0.403901	0.533112	-0.0819	negligible	0.00326397	0.00790366	0.275	small	0.0988914	0.145604	0.157	small
CE	CE(16:0)	233.882	261.275	201.932	247.835	212.18	253.39	258.381	287.375	192.732	254.735	201.434	263.409	1.34062	1.12813	1.2827	1.09098	0.0274656	0.0665085	0.217	small	0.19443	0.321853	0.127	small	0.0561161	0.102763	0.179	small	0.412706	0.495585	0.0781	negligible
CE	CE(16:1)	192.327	273.07	181.511	238.303	208.308	295.936	160.663	230.102	172.901	209.552	183.713	272.693	0.929223	1.09807	0.874534	0.843812	0.652539	0.752734	0.0443	negligible	0.0976787	0.196028	0.163	small	0.192352	0.276271	-0.122	small	0.101363	0.147758	-0.156	small
CE	CE(17:0)	8.16271	8.86242	6.62416	7.26004	9.09706	9.72976	7.98371	8.3572	6.92446	7.30135	7.59661	8.48342	1.15297	1.14461	1.05096	0.985121	0.00441214	0.0134662	0.281	small	0.00152982	0.00747063	0.311	medium	0.829466	0.871088	-0.0201	negligible	0.561931	0.643147	-0.0553	negligible
CE	CE(17:1)	14.989	18.3129	14.6703	17.293	22.297	27.9877	14.4624	16.882	13.5769	15.9997	19.9458	26.1514	1.06522	1.05514	0.725084	0.645548	0.775867	0.841959	0.0281	negligible	0.309059	0.435357	0.1	small	5.63531e-08	3.58944e-07	-0.509	large	1.33738e-09	1.39947e-08	-0.578	large
CE	CE(17:2)	2.60949	3.02498	2.14968	2.54337	3.62666	4.22788	2.3418	2.88816	1.74731	1.8741	3.60893	4.11985	1.34023	1.54109	0.648892	0.701036	0.0863694	0.175738	0.168	small	0.0912556	0.186978	0.166	small	0.000209808	0.000661007	-0.347	medium	0.00313991	0.00652477	-0.281	small
CE	CE(18:1)	764.393	1115.49	782.521	1109.98	471.372	744.441	665.306	871.395	623.363	933.066	345.543	619.491	1.06728	0.933905	1.92539	1.40663	0.546827	0.670378	0.0594	negligible	0.544244	0.670015	0.0594	negligible	5.06394e-05	0.000180943	0.379	medium	0.00159411	0.00351184	0.301	medium
CE	CE(18:2)	6012.75	6232.6	6240.85	6685.39	6824.93	7112.95	6016.11	6375.88	6225.89	6475.53	6558.81	6911.23	0.966305	0.984611	0.917257	0.922539	0.551242	0.672974	-0.0587	negligible	0.15518	0.277242	-0.139	small	0.00476227	0.0113443	-0.264	small	0.0206719	0.0356286	-0.22	small
CE	CE(18:3)	301.991	369.58	256.6	313.623	255.376	281.431	269.688	346.888	239.847	283.254	257.491	267.58	1.12442	1.22466	1.04737	1.29639	0.0965329	0.187312	0.164	small	0.086364	0.179466	0.168	small	0.179166	0.261172	0.126	small	0.0024827	0.00538839	0.289	small
CE	CE(19:2)	11.9038	9.8069	10.3955	10.2609	10.822	8.93393	10.5557	9.2929	8.538	9.00891	9.39429	7.07391	1.23632	1.03152	1.12363	1.31369	0.141591	0.246942	0.145	small	0.784191	0.870333	0.0269	negligible	0.23393	0.314412	0.111	small	0.105158	0.152531	0.154	small
CE	CE(19:3)	4.31172	3.82217	3.19631	3.79259	4.45328	4.35203	3.69744	3.53043	1.9847	3.45589	4.13013	3.54548	1.86297	1.02157	0.895236	0.995757	0.00718428	0.0202403	0.265	small	0.911736	0.96003	0.0109	negligible	0.746635	0.819341	0.0303	negligible	0.69754	0.768343	-0.0371	negligible
CE	CE(20:4)	1384.71	1745.42	1406.91	1581.71	1017.62	1169.5	1366.13	1700.95	1319.63	1426.13	972.34	1164.12	1.03524	1.1927	1.405	1.46115	0.796234	0.851447	0.0254	negligible	0.0678892	0.145194	0.179	small	1.02974e-06	5.29347e-06	0.458	medium	5.16977e-09	4.20762e-08	0.557	large
CE	CE(20:5)	343.483	473.787	268.545	371.193	339.621	708.413	266.552	372.185	228.081	323.145	239.309	556.661	1.16868	1.15176	1.11384	0.668602	0.13804	0.243649	0.146	small	0.149576	0.270529	0.141	small	0.355542	0.437706	0.0865	negligible	0.0052342	0.0100237	-0.266	small
CE	CE(22:5)	42.2107	39.0388	45.8462	41.7019	32.8969	22.2426	42.5661	39.3652	42.7856	40.3746	33.3829	17.392	0.994869	0.975001	1.27509	2.26341	0.671747	0.762876	-0.0418	negligible	0.245783	0.381031	-0.114	small	0.000700217	0.00188224	0.318	medium	4.09848e-07	1.90612e-06	0.482	medium
CE	CE(22:6)	229.395	262.196	230.161	249.703	263.342	395.706	217.002	245.29	225.121	232.475	248.589	339.933	0.963933	1.05512	0.872934	0.721582	0.994717	0.994717	0.000652	negligible	0.287853	0.419607	0.104	small	0.103794	0.164388	-0.153	small	1.62551e-05	5.60322e-05	-0.411	medium
DG	DG(32:1)	2.0863	3.25874	5.33966	4.97621	4.24581	7.19884	1.7894	2.62035	3.92057	4.45913	3.60692	6.20807	0.456413	0.587637	0.496103	0.422088	1.46294e-07	2.85761e-06	-0.518	large	3.36798e-05	0.000328939	-0.407	medium	7.74582e-06	3.28917e-05	-0.419	medium	3.91101e-08	2.29185e-07	-0.523	large
DG	DG(32:2)	0.913798	1.36537	2.00192	1.81539	2.08808	3.1473	0.886415	1.22859	1.67092	1.56407	1.74524	2.75418	0.530496	0.785505	0.507905	0.446081	0.000173916	0.00106161	-0.369	medium	0.0173133	0.0528418	-0.233	small	2.3502e-07	1.35022e-06	-0.484	medium	1.21295e-07	6.235e-07	-0.504	large
DG	DG(34:1)	10.6072	14.4726	22.6047	22.1631	16.3825	24.6652	8.94333	13.3279	17.327	20.5448	13.2082	22.3853	0.51615	0.648722	0.677106	0.595384	1.83281e-09	6.71268e-08	-0.592	large	2.06516e-06	3.18469e-05	-0.466	medium	3.35477e-06	1.53585e-05	-0.436	medium	4.22907e-07	1.93612e-06	-0.482	medium
DG	DG(34:3)	1.87972	2.6474	3.97865	3.9745	3.98053	5.53465	1.76468	2.69664	3.31863	3.70161	3.56834	5.34761	0.531749	0.728505	0.494538	0.504271	7.88578e-08	1.65038e-06	-0.529	large	7.98276e-05	0.000668271	-0.386	medium	1.06853e-09	1.0436e-08	-0.571	large	4.81127e-09	4.20762e-08	-0.558	large
DG	DG(36:2)	12.8441	17.5022	19.6102	21.4341	12.5495	16.749	11.7529	16.8362	17.3362	18.5134	10.8655	15.3385	0.677938	0.909405	1.08166	1.09764	1.10039e-05	0.000111177	-0.434	medium	0.0412584	0.0982834	-0.2	small	0.803055	0.864974	0.0233	negligible	0.59049	0.665437	0.0513	negligible
DG	DG(36:3)	10.8054	13.3624	18.0058	18.3767	14.3912	17.221	9.78025	12.8466	16.3139	16.1235	13.9813	16.0034	0.599504	0.796762	0.699524	0.802743	2.77702e-07	4.68198e-06	-0.506	large	0.000903548	0.00490258	-0.326	medium	0.000179261	0.000577181	-0.351	medium	0.00504395	0.00978726	-0.267	small
DG	DG(36:4)	3.97199	4.98245	7.49866	7.31488	6.62164	7.37125	3.72969	4.57013	6.76385	6.39895	5.53481	6.53681	0.551415	0.7142	0.67386	0.699138	3.75166e-08	9.1603e-07	-0.542	large	0.000129426	0.000997945	-0.376	medium	4.54506e-07	2.51265e-06	-0.472	medium	8.345e-05	0.000239714	-0.375	medium
DG	DG(38:5)	1.03658	1.52706	1.94114	1.92307	1.0722	1.71745	0.903109	1.3113	1.4196	1.65137	0.885934	1.58453	0.63617	0.794065	1.01939	0.827565	6.11943e-06	6.64072e-05	-0.445	medium	0.0185775	0.0561154	-0.23	small	0.551746	0.626595	-0.0557	negligible	0.167224	0.228956	-0.132	small
DG	DG(39:0)	2.9914	4.12711	2.53516	3.45053	3.14442	6.93112	2.18495	2.91219	1.86762	2.85902	2.23942	5.00687	1.16991	1.0186	0.975678	0.58164	0.320627	0.46507	0.0978	negligible	0.615612	0.727316	0.0492	negligible	0.860522	0.89727	0.0165	negligible	0.00116761	0.00267273	-0.31	medium
DG	DG(41:1)	2.29376	2.6408	2.71973	2.64999	3.03439	4.51043	2.04941	2.3888	2.56757	2.46556	2.59996	4.03202	0.798192	0.968868	0.788248	0.592457	0.126145	0.228151	-0.151	small	0.662202	0.769941	-0.0429	negligible	0.0213785	0.0434998	-0.215	small	1.57683e-06	6.41682e-06	-0.458	medium
DG	DG(42:0)	1.90465	2.33682	2.02855	2.39807	1.84526	2.15266	1.89206	2.30312	2.10492	2.43715	1.86556	2.29807	0.898874	0.945008	1.01421	1.0022	0.389376	0.533121	-0.0848	negligible	0.35449	0.485354	-0.0908	negligible	0.420897	0.499282	0.0754	negligible	0.570022	0.647351	0.0542	negligible
DG	DG(42:1)	7.12117	7.57213	7.75823	8.51545	8.18325	8.77704	6.96982	7.13489	7.54035	8.46583	8.11604	8.61513	0.924336	0.842787	0.858771	0.828181	0.0839684	0.172047	-0.17	small	0.0257462	0.0718441	-0.219	small	0.00233655	0.00580176	-0.285	small	0.00296218	0.00619955	-0.283	small
DG	DG(42:2)	0.885968	1.12574	0.857648	1.09742	1.1406	1.21031	0.830771	0.886785	0.757729	0.958979	0.840103	0.985193	1.0964	0.924718	0.988892	0.900113	0.415418	0.555787	0.0802	negligible	0.382254	0.511418	-0.0857	negligible	0.914239	0.930111	-0.0101	negligible	0.447642	0.535344	-0.0724	negligible
DG	DG(44:3)	2.74103	3.66458	3.13208	3.56104	2.06912	2.41165	2.57527	3.64707	2.99956	3.04953	2.08504	2.43807	0.858551	1.19594	1.23512	1.49588	0.103357	0.194125	-0.161	small	0.183457	0.31071	0.13	small	6.92141e-05	0.000235811	0.373	medium	5.35821e-09	4.24313e-08	0.557	large
DG	DG-O(32:2)	1.61989	2.23218	2.8051	2.85495	2.24342	3.1819	1.54566	1.93324	2.16298	2.586	1.99806	2.95306	0.714599	0.747579	0.773582	0.654656	7.51234e-05	0.000579241	-0.39	medium	0.0304019	0.0788298	-0.212	small	0.00608173	0.0142556	-0.257	small	0.00442628	0.00876284	-0.272	small
DG	DG-O(34:1)	9.35873	12.3334	13.233	15.3227	9.31604	11.8075	8.74592	11.4454	11.4309	13.456	8.75656	11.0331	0.765112	0.85058	0.998785	1.03737	5.37073e-05	0.000437117	-0.398	medium	0.0393521	0.0952907	-0.202	small	0.891795	0.920056	-0.0127	negligible	0.815616	0.853485	0.0222	negligible
DG	DG-O(36:4)	4.69192	4.88269	5.17916	5.31883	4.78274	5.13629	4.69622	4.64466	5.06738	5.32814	4.46887	5.0735	0.926754	0.871723	1.05087	0.915476	0.0656693	0.140446	-0.181	small	0.0504473	0.112832	-0.192	small	0.878368	0.912631	-0.0143	negligible	0.248511	0.317964	-0.11	small
TG	TG(44:1)	1.82732	3.4547	7.61922	7.08424	3.55607	5.7237	0.327652	0.941471	4.77583	3.78977	0.334569	0.332845	0.0686063	0.248424	0.979327	2.82856	4.15892e-05	0.00035822	-0.404	medium	0.0114077	0.039791	-0.248	small	0.156479	0.233921	-0.133	small	0.376204	0.455487	-0.0844	negligible
TG	TG(44:2)	1.04073	1.62878	3.2366	3.08001	2.15372	3.05432	0.853499	1.29023	1.8593	2.28021	1.80436	2.50249	0.459044	0.565838	0.473021	0.515578	3.04316e-06	3.56659e-05	-0.46	medium	0.00026742	0.00170335	-0.357	medium	1.49297e-06	7.41423e-06	-0.45	medium	8.99063e-05	0.000250881	-0.374	medium
TG	TG(46:2)	2.88656	4.53587	10.2388	9.78628	5.44441	8.57252	1.34027	2.38794	6.43877	6.70695	3.90859	7.66299	0.208156	0.356039	0.342904	0.31162	0.000116437	0.000812357	-0.379	medium	0.000196706	0.00134035	-0.365	medium	0.0233765	0.0472367	-0.213	small	0.0052342	0.0100237	-0.266	small
TG	TG(48:1)	27.5744	41.3077	52.7926	49.9412	29.2182	49.347	24.3415	30.3742	38.9613	43.7528	25.3389	45.3669	0.624761	0.694223	0.960638	0.669523	0.000715972	0.0028737	-0.333	medium	0.0279911	0.0752422	-0.216	small	0.417635	0.497427	-0.076	negligible	0.0458219	0.0737682	-0.191	small
TG	TG(48:2)	18.5827	30.5404	38.4559	38.111	25.1485	39.5584	14.3547	20.9475	26.2447	29.8592	20.9127	31.6476	0.546956	0.701544	0.686413	0.6619	6.35668e-05	0.00050338	-0.394	medium	0.0129802	0.0437148	-0.243	small	0.0109292	0.0238974	-0.238	small	0.00418322	0.00845298	-0.273	small
TG	TG(48:3)	5.5	8.49472	14.4792	12.4896	9.62941	15.3734	0.383817	0.375971	9.55873	2.57669	2.19082	14.948	0.0401536	0.145913	0.175193	0.0251519	0.00342755	0.011036	-0.289	small	0.215383	0.348658	-0.122	small	0.210337	0.296292	-0.117	small	0.0241878	0.0409654	-0.215	small
TG	TG(49:1)	4.98225	6.75358	8.24638	7.61238	5.90612	9.29034	4.26283	5.37236	7.47437	6.28008	5.16477	9.07901	0.570326	0.85546	0.825367	0.591734	0.000386819	0.00179902	-0.35	medium	0.100348	0.200014	-0.161	small	0.0808528	0.135371	-0.164	small	0.000745618	0.00176182	-0.321	medium
TG	TG(49:2)	3.39172	4.95265	5.56522	5.8405	5.15785	8.01364	3.18928	3.63773	4.8496	5.07611	4.58831	7.01515	0.657637	0.716638	0.695087	0.518554	0.00194379	0.00670035	-0.305	medium	0.0309055	0.0794325	-0.212	small	0.000286121	0.000873265	-0.34	medium	3.01635e-06	1.17839e-05	-0.445	medium
TG	TG(50:1)	67.4956	97.2419	113.526	124.532	56.0191	95.3339	51.6507	84.2148	84.4137	103.777	44.5304	85.1044	0.611875	0.811498	1.1599	0.989547	0.000377207	0.00179902	-0.351	medium	0.0387336	0.0945758	-0.203	small	0.252231	0.334406	0.107	small	0.938044	0.941256	-0.00741	negligible
TG	TG(50:2)	95.0168	140.585	144.258	163.336	90.0304	140.185	79.6128	119.665	114.878	135.373	77.4371	133.131	0.693019	0.883962	1.0281	0.89885	0.00432123	0.0133276	-0.281	small	0.160941	0.284071	-0.137	small	0.781216	0.847764	0.026	negligible	0.688711	0.764365	-0.0382	negligible
TG	TG(50:3)	45.9479	66.2044	71.7852	80.1138	56.9795	80.0777	40.0564	56.4107	60.4056	71.6188	50.8775	76.6463	0.663124	0.787652	0.787311	0.735987	0.000315917	0.00159593	-0.355	medium	0.0496842	0.112832	-0.192	small	0.0213787	0.0434998	-0.215	small	0.0385667	0.0627781	-0.197	small
TG	TG(50:4)	16.6653	21.8623	24.8671	27.098	21.5097	27.3687	15.3575	18.9373	20.524	23.6808	19.9775	25.3917	0.748267	0.799688	0.768736	0.745805	9.1115e-05	0.000667506	-0.385	medium	0.0103904	0.037585	-0.251	small	0.000618181	0.0016771	-0.32	medium	0.00793707	0.0148125	-0.253	small
TG	TG(51:1)	3.19045	4.33787	3.69642	4.94298	4.17623	6.62914	2.37379	3.02565	1.40342	1.56198	3.2627	4.67613	1.69143	1.93706	0.727554	0.647042	0.905132	0.933816	-0.0117	negligible	0.505992	0.647404	0.0652	negligible	0.252231	0.334406	-0.107	small	0.229438	0.300113	-0.114	small
TG	TG(51:2)	9.30604	13.3759	13.2128	15.1375	11.0428	16.5277	8.34313	12.5636	11.6752	13.3515	10.1732	15.3838	0.714603	0.940985	0.820106	0.816675	0.00588029	0.0172292	-0.271	small	0.217808	0.350646	-0.121	small	0.0679841	0.119356	-0.171	small	0.0103158	0.0187735	-0.245	small
TG	TG(51:3)	6.10718	8.0381	8.75898	9.85154	8.72375	11.9381	6.25141	6.76941	8.10789	8.90606	7.87172	10.6251	0.771028	0.76009	0.794161	0.637117	0.0011501	0.00416023	-0.32	medium	0.0294173	0.077651	-0.214	small	6.44284e-05	0.000224732	-0.375	medium	9.66352e-06	3.53926e-05	-0.421	medium
TG	TG(51:4)	2.47409	3.22636	3.74805	3.91588	3.71109	5.00884	2.27851	3.02976	3.51931	3.59319	3.35348	4.58695	0.647431	0.843195	0.679446	0.660517	9.11271e-05	0.000667506	-0.385	medium	0.0387341	0.0945758	-0.203	small	9.31833e-06	3.90039e-05	-0.415	medium	1.2783e-06	5.35061e-06	-0.461	medium
TG	TG(51:5)	0.658462	0.944052	0.977427	1.09692	1.15007	1.68427	0.447478	0.863098	0.890902	0.906094	1.30072	1.55027	0.502275	0.952548	0.344022	0.556739	0.228187	0.355632	-0.119	small	0.579413	0.698276	-0.0543	negligible	0.0004603	0.00133533	-0.328	medium	3.60262e-05	0.000108826	-0.394	medium
TG	TG(52:2)	245.185	339.164	325.135	392.084	180.588	252.544	215.465	334.652	287.479	345.858	164.579	239.933	0.749498	0.967601	1.30919	1.39478	0.0120936	0.0328094	-0.247	small	0.267651	0.40011	-0.109	small	0.00308911	0.00760597	0.277	small	0.00284878	0.00604863	0.284	small
TG	TG(52:3)	231.524	298.26	323.635	371.156	231.79	287.857	207.753	293.575	285.304	319.254	205.673	250.665	0.728182	0.919565	1.01011	1.17118	0.000887973	0.00337891	-0.327	medium	0.0357638	0.0902385	-0.206	small	0.807441	0.864974	-0.0229	negligible	0.56193	0.643147	0.0553	negligible
TG	TG(52:4)	97.3091	123.387	145.026	159.756	122.035	140.442	93.8918	111.699	130.696	133.373	106.759	123.606	0.718399	0.837498	0.879471	0.903675	0.0003002	0.00154313	-0.357	medium	0.0158397	0.0499037	-0.236	small	0.00958926	0.0216127	-0.243	small	0.323859	0.40379	-0.0941	negligible
TG	TG(52:5)	24.9127	34.0164	38.3188	43.0905	31.2045	39.0477	21.9752	27.892	33.7688	38.3543	26.9726	31.5441	0.650754	0.727219	0.814724	0.884224	0.000547787	0.00236032	-0.341	medium	0.0150095	0.0488644	-0.238	small	0.0183782	0.0379212	-0.221	small	0.161778	0.224649	-0.133	small
TG	TG(52:6)	5.00736	6.41272	6.14769	8.15771	6.15126	9.66691	4.14787	4.56101	4.94107	6.20909	4.84657	6.57869	0.839469	0.734569	0.855836	0.6933	0.0382268	0.0888926	-0.204	small	0.0139623	0.0459659	-0.241	small	0.075114	0.128704	-0.167	small	0.00159411	0.00351184	-0.301	medium
TG	TG(52:7)	2.52197	2.73598	2.46931	3.02592	3.11537	3.77978	2.59705	2.45525	2.54426	2.78036	3.07641	3.48806	1.02075	0.883068	0.844181	0.703902	0.755654	0.835497	0.0306	negligible	0.0460112	0.10872	-0.196	small	0.000877405	0.00225509	-0.312	medium	1.27823e-06	5.35061e-06	-0.461	medium
TG	TG(53:3)	5.84433	7.93115	8.27891	10.329	8.60402	11.4949	5.53476	6.88928	7.41765	9.0616	7.97463	10.5304	0.746161	0.760271	0.694046	0.654226	0.000909318	0.00341577	-0.327	medium	0.0253153	0.0713209	-0.22	small	5.18617e-06	2.23463e-05	-0.427	medium	6.83082e-05	0.000200143	-0.379	medium
TG	TG(53:4)	3.22413	4.43803	4.66146	5.4662	5.46311	6.67963	2.92336	3.97181	4.15601	4.80305	5.03929	6.10996	0.703405	0.826935	0.580112	0.650055	0.000144393	0.000919723	-0.374	medium	0.026625	0.0729077	-0.218	small	1.57519e-09	1.44228e-08	-0.566	large	3.69483e-06	1.40595e-05	-0.441	medium
TG	TG(53:5)	1.65796	2.09766	2.27683	2.69868	2.39986	3.0488	1.58478	1.84483	2.10236	2.43008	2.2344	2.60566	0.753813	0.759162	0.709267	0.708007	0.00264722	0.00881403	-0.297	small	0.00680955	0.0269621	-0.266	small	4.37604e-05	0.000160273	-0.383	medium	0.000115003	0.000306326	-0.368	medium
TG	TG(53:6)	0.351859	0.751134	0.612583	0.841582	1.00293	1.80309	0.0413751	0.0494121	0.0411508	0.0498098	1.20644	1.94952	1.00545	0.992014	0.0342952	0.0253458	0.657321	0.755275	-0.0437	negligible	0.481297	0.621233	-0.069	negligible	4.16735e-05	0.000154561	-0.384	medium	6.33778e-07	2.85688e-06	-0.475	medium
TG	TG(54:2)	0.992434	0.813873	1.22694	1.24113	0.823347	2.02853	0.628419	0.555846	0.609088	0.585207	0.612501	0.66761	1.03174	0.949828	1.02599	0.832591	0.47866	0.620564	0.0698	negligible	0.891086	0.942556	-0.0134	negligible	0.977391	0.977391	0.00265	negligible	0.0045101	0.00886886	-0.271	small
TG	TG(54:3)	66.3149	89.3019	97.5837	136.921	63.9919	78.3263	64.1007	89.5189	100.782	101.739	56.7913	70.0029	0.636031	0.879889	1.12871	1.27879	0.000116447	0.000812357	-0.379	medium	0.0363418	0.0902385	-0.205	small	0.578574	0.654526	0.052	negligible	0.113087	0.160847	0.151	small
TG	TG(54:4)	64.9739	80.7678	99.5426	126.336	77.1799	82.8269	60.1183	76.8187	99.9143	95.0684	73.3544	76.9622	0.601698	0.808037	0.819559	0.998135	2.69524e-05	0.000239304	-0.414	medium	0.00127686	0.00656351	-0.316	medium	0.0326094	0.062859	-0.2	small	0.914294	0.926948	0.0103	negligible
TG	TG(54:5)	46.1022	59.715	72.5411	88.3175	56.2881	60.2854	40.6831	53.2565	70.5304	70.4849	48.1329	50.9661	0.576816	0.755573	0.845224	1.04494	1.89216e-05	0.000178839	-0.422	medium	0.00152982	0.00747063	-0.311	medium	0.043609	0.0813849	-0.189	small	0.715315	0.779135	0.0348	negligible
TG	TG(54:6)	24.6891	34.0884	37.3189	45.8701	30.6187	39.3174	22.9691	29.6901	34.2642	38.307	24.8214	36.4486	0.670354	0.775057	0.925375	0.814574	0.000292618	0.00154313	-0.357	medium	0.0173133	0.0528418	-0.233	small	0.0590984	0.106888	-0.177	small	0.120047	0.169922	-0.148	small
TG	TG(54:7)	6.47301	9.14156	9.73876	13.5184	8.35049	10.3216	5.41899	6.05565	7.90866	9.80224	6.20405	8.49545	0.685197	0.617782	0.87346	0.712811	0.003653	0.0113865	-0.287	small	0.00629335	0.0252596	-0.268	small	0.33526	0.419792	-0.0903	negligible	0.196533	0.261746	-0.123	small
TG	TG(55:6)	1.2322	1.72264	1.54653	1.83643	1.52312	2.5525	1.36602	1.65832	1.67747	1.74505	1.54223	2.20509	0.814337	0.950299	0.885747	0.752042	0.0696492	0.146815	-0.178	small	0.927264	0.96003	-0.00895	negligible	0.0967659	0.155783	-0.155	small	0.000290797	0.000728236	-0.345	medium
TG	TG(55:7)	0.647966	0.931273	0.919298	1.09398	1.11158	2.30874	0.0971542	0.0996691	0.513552	0.905836	1.22453	2.0666	0.189181	0.11003	0.0793398	0.0482285	0.569074	0.6778	-0.0561	negligible	1	1	0	negligible	0.0321514	0.0623865	-0.2	small	5.29789e-08	2.98516e-07	-0.519	large
TG	TG(56:6)	10.1042	13.9708	12.9899	13.8554	9.65982	10.8715	9.84532	13.7947	13.6424	13.4808	9.23855	11.0894	0.721669	1.02329	1.06568	1.24395	0.00350122	0.0111506	-0.288	small	0.94282	0.972698	0.00703	negligible	0.621928	0.690245	0.0462	negligible	0.00459527	0.0089761	0.27	small
TG	TG(56:7)	17.1649	24.4415	20.7996	25.6542	17.8824	30.654	14.8014	22.745	20.7446	23.0942	16.0568	29.2293	0.713504	0.984878	0.921811	0.778158	0.078201	0.163664	-0.173	small	0.839811	0.91135	-0.0198	negligible	0.395208	0.478498	-0.0796	negligible	0.0176101	0.0308967	-0.226	small
TG	TG(56:8)	6.89635	9.34216	7.19273	12.639	10.74	22.1377	3.64971	4.39356	5.1866	7.78486	8.92615	21.6344	0.703681	0.564373	0.408879	0.203083	0.164397	0.27683	-0.137	small	0.0900125	0.18573	-0.167	small	0.007593	0.0175177	-0.25	small	1.29484e-07	6.54118e-07	-0.503	large
TG	TG(56:9)	1.93171	2.73845	2.06045	2.62533	2.08486	3.39669	1.55542	1.95092	1.66202	1.99174	1.92653	2.67509	0.935861	0.979506	0.807368	0.729294	0.389379	0.533121	-0.0848	negligible	0.829629	0.90702	-0.0211	negligible	0.48925	0.564371	-0.0648	negligible	0.0471364	0.0750596	-0.19	small
LPC	LPC(14:0)	0.853239	0.77954	1.09158	1.27824	0.952698	1.21868	0.817166	0.711748	0.95964	1.30785	0.929695	1.11812	0.851534	0.544213	0.878961	0.636557	0.0839676	0.172047	-0.17	small	0.000140109	0.00103026	-0.374	medium	0.811836	0.864974	-0.0223	negligible	0.0159704	0.0283596	-0.23	small
LPC	LPC(15:0)	0.45053	0.446546	0.583451	0.602096	0.84736	0.88633	0.434432	0.433609	0.548164	0.573891	0.803057	0.874215	0.792523	0.75556	0.540973	0.495998	0.000715948	0.0028737	-0.333	medium	0.000440495	0.00268885	-0.344	medium	1.27226e-14	2.66265e-13	-0.722	large	2.22389e-16	7.23999e-15	-0.783	large
LPC	LPC(16:0)	57.2689	60.69	84.1276	86.5173	98.4238	101.286	56.4035	59.7091	81.9124	85.9816	94.3474	98.1813	0.688584	0.694441	0.597828	0.608152	6.35855e-11	3.72611e-09	-0.644	large	1.1749e-09	4.30306e-08	-0.596	large	1.96267e-16	5.22784e-15	-0.77	large	1.74523e-15	4.64865e-14	-0.759	large
LPC	LPC(16:1)	1.62415	1.92426	2.14921	2.47866	3.34661	3.70815	1.5258	1.78597	2.05	2.30751	3.17218	3.6441	0.744293	0.77398	0.480993	0.490099	1.86802e-06	2.3797e-05	-0.47	medium	1.10846e-05	0.000120288	-0.43	medium	4.91487e-17	1.44006e-15	-0.786	large	4.711e-14	9.85945e-13	-0.719	large
LPC	LPC(17:0)	1.05628	1.07977	1.4977	1.49463	2.45225	2.48224	1.01525	1.04765	1.45163	1.47783	2.38916	2.48156	0.699387	0.708914	0.424939	0.422176	8.67593e-07	1.2105e-05	-0.485	medium	2.83679e-05	0.000286614	-0.411	medium	8.07879e-18	4.73417e-16	-0.805	large	1.86099e-18	2.72635e-16	-0.836	large
LPC	LPC(17:1)	0.227894	0.230252	0.261949	0.27954	0.487106	0.515406	0.232331	0.224339	0.262567	0.266086	0.444673	0.482394	0.884844	0.843106	0.522475	0.465054	0.0274656	0.0665085	-0.217	small	0.000842241	0.00465616	-0.328	medium	4.46287e-17	1.44006e-15	-0.787	large	5.9301e-18	3.66093e-16	-0.823	large
LPC	LPC(18:0)	35.7911	39.9295	54.8835	58.6148	68.5319	70.9108	36.2342	39.4786	51.8137	59.764	66.3661	69.3462	0.699316	0.660574	0.545974	0.569297	1.34057e-10	6.54643e-09	-0.633	large	3.59124e-08	8.76862e-07	-0.54	large	3.45374e-16	8.43289e-15	-0.764	large	6.65713e-15	1.50041e-13	-0.743	large
LPC	LPC(18:1)	27.0445	27.4578	33.5871	35.0152	40.5675	38.9952	27.0343	25.3877	33.9852	34.0265	38.789	39.2911	0.795473	0.746114	0.696958	0.646143	0.000193245	0.00113242	-0.368	medium	6.0326e-06	6.79827e-05	-0.444	medium	1.68187e-10	1.89534e-09	-0.598	large	1.67052e-09	1.6878e-08	-0.575	large
LPC	LPC(18:2)	23.2407	19.6081	32.4127	28.6378	37.5996	31.5979	23.4159	18.6012	32.1288	27.1346	38.5762	28.1405	0.728815	0.685519	0.607005	0.661014	4.27908e-05	0.00035822	-0.403	medium	2.27435e-06	3.33193e-05	-0.464	medium	1.81892e-08	1.29987e-07	-0.527	large	1.02949e-07	5.58592e-07	-0.507	large
LPC	LPC(20:0)	0.105372	0.0888363	0.100332	0.0942417	0.17749	0.1508	0.0715887	0.0637899	0.0607498	0.0599693	0.155428	0.109316	1.17842	1.06371	0.460591	0.583535	0.4464	0.586526	0.075	negligible	0.860252	0.923274	-0.0173	negligible	0.000556772	0.00152462	-0.323	medium	0.000153838	0.000395389	-0.36	medium
LPC	LPC(20:1)	0.36298	0.367376	0.462275	0.477962	0.705128	0.811121	0.348408	0.367561	0.455236	0.444566	0.690055	0.750179	0.765334	0.826785	0.504899	0.489964	2.32755e-05	0.000213116	-0.417	medium	0.000147682	0.00103026	-0.372	medium	1.19839e-17	5.85212e-16	-0.801	large	1.43562e-17	6.00908e-16	-0.813	large
LPC	LPC(20:3)	9.37129	10.9725	12.3709	13.9474	16.0758	15.7199	9.34175	10.0451	12.3433	13.2765	14.2719	14.4069	0.756827	0.756613	0.654553	0.697247	0.00217239	0.00740129	-0.302	medium	0.00437912	0.0185954	-0.279	small	2.78106e-08	1.94012e-07	-0.52	large	9.21512e-05	0.00025472	-0.373	medium
LPC	LPC(20:4)	14.3304	14.8215	18.8095	18.71	19.869	18.1149	13.7908	13.5345	17.4185	18.464	19.7714	18.619	0.791733	0.733024	0.697513	0.726923	0.00027799	0.00150835	-0.358	medium	0.000113313	0.000897313	-0.379	medium	3.64261e-06	1.6171e-05	-0.434	medium	0.00166073	0.0036313	-0.3	medium
LPC	LPC(22:5)	0.249536	0.245944	0.264174	0.287742	0.331742	0.335274	0.246127	0.241482	0.297635	0.285826	0.334475	0.345825	0.826943	0.844856	0.735861	0.698276	0.192111	0.307588	-0.128	small	0.0275292	0.0746856	-0.216	small	0.000256281	0.000790426	-0.343	medium	0.000133092	0.000348177	-0.364	medium
LPC	LPC(22:6)	2.30376	2.51987	2.87648	2.89504	3.29791	3.96335	2.27358	2.50395	2.82321	2.76931	3.22088	3.70836	0.80532	0.904178	0.70589	0.675218	0.000386805	0.00179902	-0.35	medium	0.0039507	0.0170229	-0.282	small	4.80627e-08	3.12942e-07	-0.511	large	3.23206e-09	3.05507e-08	-0.564	large
LPC	LPC-O(16:1)	1.01541	1.01676	1.31069	1.40165	1.52687	1.51104	1.01641	0.952271	1.2447	1.34527	1.50159	1.45558	0.816589	0.707865	0.676886	0.654222	0.000140571	0.000915275	-0.375	medium	4.42268e-06	5.63411e-05	-0.45	medium	1.11672e-10	1.36333e-09	-0.604	large	1.99387e-10	2.24694e-09	-0.606	large
LPC	LPC-O(18:0)	0.412838	0.44299	0.522353	0.528846	0.656342	0.572742	0.429606	0.452947	0.517928	0.492543	0.63126	0.560936	0.82947	0.919609	0.680553	0.807485	0.00166066	0.00586232	-0.31	medium	0.0139616	0.0459659	-0.241	small	2.09927e-10	2.2781e-09	-0.595	large	2.07029e-05	6.89314e-05	-0.406	medium
LPC	LPC-O(18:1)	0.925816	0.911933	1.29332	1.43441	1.47049	1.39955	0.951604	0.877005	1.27522	1.33716	1.32397	1.33938	0.746228	0.655873	0.71875	0.654785	4.85203e-07	7.10822e-06	-0.496	medium	4.57417e-09	1.34023e-07	-0.575	large	4.55013e-13	8.33243e-12	-0.678	large	1.79673e-12	3.09671e-11	-0.672	large
LPC	LPC-O(18:2)	0.275575	0.294651	0.315474	0.360721	0.430523	0.415612	0.269441	0.29777	0.300383	0.356197	0.411543	0.408638	0.896992	0.83597	0.65471	0.728688	0.0330065	0.0786252	-0.21	small	0.00178817	0.00845052	-0.306	medium	8.83351e-12	1.29411e-10	-0.639	large	4.98739e-09	4.20762e-08	-0.558	large
PC	PC(24:0)	0.251223	0.212015	0.217323	0.245471	0.284013	0.280578	0.131602	0.12999	0.128672	0.140906	0.144612	0.247227	1.02277	0.922525	0.910034	0.52579	0.54243	0.667782	0.06	negligible	0.175014	0.303426	-0.133	small	0.296985	0.383333	-0.0974	negligible	0.0135345	0.0243288	-0.236	small
PC	PC(25:0)	0.107968	0.087619	0.0908991	0.101442	0.349282	0.368795	0.0965913	0.0868587	0.0912237	0.0912898	0.317923	0.343554	1.05884	0.951461	0.303819	0.252824	0.124513	0.226599	0.152	small	0.262064	0.393767	-0.11	small	2.15523e-17	9.02117e-16	-0.795	large	3.15848e-18	3.08479e-16	-0.83	large
PC	PC(29:0)	0.181049	0.207607	0.173517	0.159036	0.213986	0.25623	0.145889	0.109297	0.108796	0.10322	0.124589	0.209288	1.34095	1.05888	1.17096	0.522232	0.109087	0.202295	0.158	small	0.337803	0.464678	0.094	negligible	0.891795	0.920056	0.0127	negligible	0.00387797	0.00800172	-0.276	small
PC	PC(30:0)	3.50151	3.77847	3.52092	3.38231	3.16491	4.24787	3.04177	3.27499	2.82114	3.13005	2.81792	4.43848	1.07821	1.0463	1.07944	0.737862	0.512152	0.641285	0.0645	negligible	0.592868	0.703281	0.0525	negligible	0.373528	0.457924	0.0834	negligible	0.10775	0.154759	-0.154	small
PC	PC(31:0)	0.36523	0.349928	0.325107	0.161171	0.357111	0.528358	0.20645	0.197657	0.0435392	0.0387045	0.259998	0.433659	4.7417	5.10681	0.794045	0.455788	0.0201249	0.0521823	0.229	small	0.00629335	0.0252596	0.268	small	0.401541	0.484024	-0.0786	negligible	0.00296224	0.00619955	-0.283	small
PC	PC(31:3)	0.114767	0.136072	0.107149	0.134899	0.142747	0.223887	0.107213	0.140146	0.0514789	0.119328	0.139709	0.232436	2.08266	1.17446	0.767403	0.602944	0.353949	0.496207	0.0913	negligible	0.953203	0.973563	-0.00576	negligible	0.163215	0.23911	-0.13	small	0.000139695	0.000362218	-0.363	medium
PC	PC(32:0)	18.4387	20.0543	18.8724	19.1108	15.8673	19.765	18.4082	19.9042	17.5477	18.0192	15.4809	19.1765	1.04904	1.10461	1.18909	1.03795	0.770797	0.841959	-0.0287	negligible	0.284902	0.417382	0.105	small	0.00147382	0.00369102	0.298	small	0.938044	0.941256	0.00741	negligible
PC	PC(32:1)	23.6848	29.4934	23.0089	25.9155	19.109	26.6956	20.4923	24.4857	20.3005	20.9633	18.0167	23.4596	1.00945	1.16803	1.13741	1.04374	0.560121	0.675375	0.0574	negligible	0.108704	0.208172	0.157	small	0.0539625	0.0994404	0.181	small	0.469388	0.554559	0.0689	negligible
PC	PC(32:2)	5.82633	6.19163	6.26157	6.38063	6.4887	7.14606	5.50104	5.89761	6.07879	6.05293	6.103	7.00527	0.904956	0.974339	0.901366	0.841881	0.320629	0.46507	-0.0978	negligible	0.518584	0.654935	-0.0633	negligible	0.082843	0.136365	-0.162	small	0.0277841	0.0467859	-0.21	small
PC	PC(32:3)	1.56442	1.67631	1.40942	1.46333	1.38384	1.80251	1.39562	1.44677	1.1679	1.36329	1.30665	1.84343	1.19498	1.06123	1.06809	0.784826	0.0900736	0.179534	0.168	small	0.296817	0.428411	0.102	small	0.220839	0.308124	0.114	small	0.234105	0.303508	-0.113	small
PC	PC(32:4)	0.446841	0.473719	0.454775	0.422757	0.428245	0.44121	0.464973	0.48718	0.533215	0.529478	0.434505	0.478867	0.872019	0.920113	1.07012	1.01736	0.780946	0.844344	-0.0274	negligible	0.535621	0.664987	0.0607	negligible	0.968351	0.971667	0.00372	negligible	0.582264	0.658701	0.0524	negligible
PC	PC(32:5)	1.02031	1.14794	0.96796	1.04547	0.922716	0.94797	1.03437	1.10612	1.00297	1.00446	0.947538	0.930789	1.0313	1.10121	1.09164	1.18837	0.393035	0.533145	0.0841	negligible	0.0577663	0.12631	0.186	small	0.0575907	0.104808	0.178	small	0.000448526	0.00110435	0.335	medium
PC	PC(32:6)	0.146205	0.166956	0.314927	0.187417	0.177076	0.436106	0.0184396	0.0186273	0.154	0.0985	0.0795	0.188	0.119738	0.189109	0.231945	0.0990811	0.00365281	0.0113865	-0.287	small	0.15518	0.277242	-0.139	small	0.299615	0.385031	-0.0974	negligible	0.000128316	0.000338707	-0.365	medium
PC	PC(33:0)	1.1545	1.28457	1.12667	1.05177	1.59148	2.1589	1.05779	1.17952	0.983004	1.03538	1.55764	2.10489	1.07608	1.13921	0.679101	0.560369	0.289428	0.43939	0.104	small	0.0520028	0.11543	0.19	small	0.000219389	0.000683839	-0.347	medium	5.16977e-09	4.20762e-08	-0.557	large
PC	PC(33:1)	5.53896	7.13264	4.80101	4.9522	6.12753	8.70333	5.74924	7.08838	5.3791	6.3633	6.99865	8.55081	1.06881	1.11395	0.821478	0.828972	0.295498	0.44174	0.103	small	0.0024821	0.0111885	0.297	small	0.202199	0.288997	-0.12	small	0.0299746	0.0501861	-0.207	small
PC	PC(33:2)	3.31002	3.13472	3.24804	3.07226	3.96603	4.11551	3.2539	3.12999	2.81755	2.95678	3.79222	3.96634	1.15487	1.05858	0.858046	0.789137	0.495253	0.628181	0.0672	negligible	0.700452	0.795474	0.0378	negligible	0.00927791	0.0210731	-0.244	small	2.18413e-05	7.11057e-05	-0.405	medium
PC	PC(33:3)	0.714897	0.625722	0.616032	0.655537	0.698538	0.788103	0.676018	0.587339	0.590053	0.669712	0.658839	0.716618	1.14569	0.877003	1.02607	0.819598	0.0875905	0.176993	0.168	small	0.262064	0.393767	-0.11	small	0.847183	0.886517	0.0181	negligible	0.00402797	0.00819579	-0.275	small
PC	PC(33:4)	1.64216	1.50444	1.59982	1.47551	1.56795	1.49704	1.58363	1.50014	1.62855	1.50978	1.57436	1.43659	0.972422	0.993614	1.00589	1.04423	0.705872	0.795464	0.0371	negligible	0.855131	0.921152	0.0179	negligible	0.404729	0.484024	0.078	negligible	0.843583	0.873391	0.0188	negligible
PC	PC(34:1)	247.907	271.353	250.935	259.108	200.176	234.586	228.171	261.899	244.904	240.366	204.498	227.762	0.931675	1.08958	1.11576	1.14988	0.700959	0.792976	-0.0378	negligible	0.222715	0.356587	0.12	small	3.59581e-05	0.000135073	0.387	medium	0.00395232	0.00809811	0.275	small
PC	PC(34:3)	24.3289	26.0277	23.4289	24.2201	24.4123	26.8588	22.9231	23.6702	22.5639	23.263	23.6195	26.2287	1.01592	1.0175	0.970516	0.902455	0.652541	0.752734	0.0443	negligible	0.305966	0.433085	0.1	small	0.789932	0.85406	-0.0249	negligible	0.236465	0.303878	-0.113	small
PC	PC(34:4)	11.5434	14.2788	10.4518	12.1251	9.26115	12.2431	10.0983	11.7818	9.49835	9.93539	8.63613	11.2544	1.06317	1.18585	1.16931	1.04686	0.174676	0.289153	0.134	small	0.0299063	0.0782371	0.213	small	0.00897589	0.0205464	0.244	small	0.163578	0.226077	0.133	small
PC	PC(34:5)	3.61031	3.9872	3.61203	3.80596	3.67728	4.10386	3.46399	3.93188	3.72477	3.91022	3.59286	4.1548	0.929987	1.00554	0.96413	0.946346	0.858118	0.897959	-0.0176	negligible	0.522816	0.657446	0.0627	negligible	0.909744	0.928763	-0.0106	negligible	0.462076	0.54813	-0.0701	negligible
PC	PC(35:1)	3.9879	4.32714	4.08543	4.1501	4.8429	5.73212	3.9034	4.16368	3.68501	3.7613	4.85026	5.4867	1.05926	1.10698	0.804781	0.758868	0.666924	0.760345	0.0424	negligible	0.179199	0.307049	0.131	small	0.000729713	0.00192618	-0.317	medium	2.38718e-06	9.58142e-06	-0.45	medium
PC	PC(35:2)	8.62295	8.42922	9.30743	8.88915	12.3916	12.7313	8.64349	8.15616	8.96863	8.60479	12.0259	12.9146	0.963747	0.947863	0.718737	0.631544	0.28048	0.428024	-0.106	small	0.430123	0.565139	-0.0774	negligible	4.15835e-09	3.58352e-08	-0.551	large	2.61532e-11	3.06516e-10	-0.636	large
PC	PC(35:3)	2.89028	3.02905	3.03927	3.10819	3.79072	4.01753	3.03007	3.08593	2.95313	3.03574	3.73248	3.96607	1.02605	1.01653	0.81181	0.778083	0.957757	0.967665	-0.00522	negligible	0.839811	0.91135	0.0198	negligible	0.00012157	0.000400225	-0.36	medium	1.23822e-05	4.37108e-05	-0.417	medium
PC	PC(35:4)	2.86822	3.19851	2.45384	2.56834	2.62299	3.17451	2.62552	2.86134	2.10402	2.31204	2.42231	2.9715	1.24786	1.23758	1.08389	0.962928	0.0142931	0.0384209	0.241	small	0.00592952	0.0244697	0.27	small	0.281512	0.368227	0.101	small	0.774114	0.827793	-0.0274	negligible
PC	PC(35:5)	2.22222	2.25331	2.04129	1.97254	2.47272	2.54128	2.08478	2.29487	1.88654	1.87339	2.35649	2.54545	1.10508	1.22499	0.884698	0.901561	0.100582	0.191366	0.162	small	0.0261826	0.0723726	0.218	small	0.0413003	0.0780717	-0.191	small	0.0144665	0.0258457	-0.234	small
PC	PC(36:1)	14.3331	39.8307	12.7328	34.1571	11.4723	26.4545	7.26283	23.8919	2.86954	2.8332	1.99392	3.39642	2.53101	8.43283	3.64248	7.03443	0.0101993	0.0279289	0.253	small	0.00121993	0.00638283	0.317	medium	0.0614204	0.110406	0.175	small	0.0348034	0.0572887	0.201	small
PC	PC(36:2)	205.332	215.001	240.967	244.006	226.688	235.761	203.135	206.767	236.431	228.099	224.06	228.694	0.859175	0.90648	0.906612	0.904123	0.000751156	0.00293481	-0.332	medium	0.00708173	0.0276659	-0.264	small	0.0479118	0.0888492	-0.185	small	0.0190868	0.0332883	-0.223	small
PC	PC(36:3)	117.9	130.887	137.449	143.183	130.14	127.761	113.976	124.574	129.714	137.258	130.767	128.186	0.878671	0.907592	0.87159	0.971823	0.00237287	0.00799138	-0.3	medium	0.0552343	0.121681	-0.188	small	0.0430222	0.0808046	-0.189	small	0.774113	0.827793	0.0274	negligible
PC	PC(36:4)	275.798	309.522	283.064	291.36	210.866	236.099	267.932	297.987	274.959	280.289	207.148	228.409	0.974442	1.06314	1.29343	1.30462	0.582624	0.688345	-0.0542	negligible	0.105859	0.205408	0.159	small	7.25823e-08	4.52481e-07	0.504	large	7.13082e-09	5.49824e-08	0.552	large
PC	PC(36:5)	258.645	258.226	270.021	271.71	262.28	278.737	255.098	254.478	265.455	265.212	257.074	276.572	0.960985	0.959526	0.992313	0.920115	0.304759	0.448716	-0.101	small	0.281979	0.415176	-0.106	small	0.811836	0.864974	-0.0223	negligible	0.0491672	0.0778701	-0.188	small
PC	PC(36:6)	9.82579	10.4051	8.8569	9.35579	10.3827	11.2932	9.15973	9.56455	8.34737	9.12099	10.0968	11.1027	1.09732	1.04863	0.907193	0.861462	0.330401	0.472232	0.0959	negligible	0.201243	0.329408	0.126	small	0.161511	0.239003	-0.131	small	0.0458209	0.0737682	-0.191	small
PC	PC(37:1)	0.445563	0.482372	0.512936	0.498383	0.544162	0.653144	0.443906	0.496241	0.519481	0.474847	0.510163	0.671086	0.854519	1.04505	0.870126	0.739459	0.0212144	0.0540505	-0.227	small	0.922085	0.96003	-0.00959	negligible	0.00326391	0.00790366	-0.275	small	3.08005e-05	9.60059e-05	-0.398	medium
PC	PC(37:2)	1.26848	1.28054	1.405	1.33091	1.79065	1.84878	1.23258	1.26244	1.307	1.30554	1.68325	1.86566	0.943064	0.966983	0.732263	0.676672	0.138036	0.243649	-0.146	small	0.82455	0.904843	-0.0218	negligible	1.30753e-08	9.57769e-08	-0.533	large	3.29794e-10	3.57887e-09	-0.599	large
PC	PC(37:3)	1.6339	1.98385	1.90182	2.02973	2.47996	2.73645	1.60024	1.89303	1.79822	1.88783	2.3822	2.65853	0.889904	1.00275	0.671752	0.712057	0.0492443	0.109307	-0.194	small	0.963594	0.973563	-0.00447	negligible	3.96641e-08	2.7027e-07	-0.514	large	1.35746e-06	5.60192e-06	-0.461	medium
PC	PC(37:4)	5.77638	6.96688	5.46253	5.63696	5.94864	6.43717	5.57811	6.98165	4.35763	5.65627	5.88189	6.43891	1.28008	1.23432	0.948352	1.08429	0.0618787	0.135302	0.184	small	0.000803633	0.00452816	0.328	medium	0.642087	0.70993	-0.0436	negligible	0.236465	0.303878	0.113	small
PC	PC(37:5)	10.3436	10.2795	8.42052	7.77735	12.8871	11.4802	9.91552	9.79378	6.06771	6.81524	13.11	11.4381	1.63414	1.43704	0.756334	0.856242	0.0165367	0.0440478	0.236	small	0.00227621	0.0105862	0.299	small	0.0116596	0.0253057	-0.236	small	0.124382	0.175211	-0.147	small
PC	PC(37:6)	4.79969	5.03709	4.41805	4.45358	4.47903	4.48774	4.85834	4.94227	4.48114	4.39065	4.33597	4.61042	1.08418	1.12564	1.12048	1.07198	0.0952124	0.185982	0.165	small	0.0209844	0.0608755	0.227	small	0.22084	0.308124	0.114	small	0.0313586	0.0522049	0.205	small
PC	PC(37:7)	0.60207	0.707078	0.608371	0.551552	0.647875	0.699585	0.527984	0.666253	0.488149	0.445578	0.626519	0.67199	1.0816	1.49526	0.842727	0.991462	0.837373	0.882555	0.0202	negligible	0.00892998	0.0335447	0.256	small	0.45435	0.528272	-0.0701	negligible	0.885896	0.904416	-0.0136	negligible
PC	PC(38:1)	1.53845	1.70385	1.70573	1.75782	1.68698	2.30145	1.58825	1.80089	1.72925	1.82486	1.73216	2.25383	0.91846	0.986867	0.916918	0.799036	0.148906	0.258162	-0.142	small	0.570517	0.696506	-0.0556	negligible	0.124526	0.193048	-0.144	small	7.36504e-05	0.000213659	-0.378	medium
PC	PC(38:2)	5.6394	6.38866	7.33804	6.79898	6.5278	6.8415	5.62619	6.16728	7.61286	7.3851	6.82821	7.3642	0.739038	0.835098	0.823963	0.837468	0.00624713	0.0181229	-0.269	small	0.690814	0.787582	-0.039	negligible	0.081843	0.13625	-0.163	small	0.357162	0.439699	-0.0878	negligible
PC	PC(38:3)	25.0517	43.0037	28.0525	33.8612	29.6582	32.8751	22.4211	42.0252	23.1343	34.2802	32.2877	34.1667	0.969174	1.22593	0.694417	1.23	0.462374	0.604802	-0.0724	negligible	0.0224785	0.0639437	0.224	small	0.0247969	0.0494251	-0.21	small	0.00913655	0.0168365	0.249	small
PC	PC(38:4)	106.252	131.982	119.298	128.236	84.6318	96.8101	103.906	129.685	112.493	118.315	84.7408	96.5694	0.923671	1.09611	1.22616	1.34292	0.0900727	0.179534	-0.168	small	0.230221	0.364621	0.118	small	3.54418e-06	1.59761e-05	0.435	medium	1.97238e-08	1.31343e-07	0.535	large
PC	PC(38:5)	171.777	186.904	168.107	173.952	176.308	196.515	172.136	182.303	170.607	172.634	182.646	196.325	1.00896	1.05601	0.942454	0.928576	0.775866	0.841959	0.0281	negligible	0.166864	0.292761	0.135	small	0.388934	0.474823	-0.0807	negligible	0.100121	0.146677	-0.156	small
PC	PC(38:6)	145.714	158.785	154.792	159.079	156.78	188.52	139.776	154.329	148.71	152.385	156.31	184.658	0.939926	1.01275	0.894223	0.835754	0.233337	0.35983	-0.117	small	0.916909	0.96003	0.0102	negligible	0.0779392	0.132001	-0.165	small	5.43878e-05	0.000160966	-0.385	medium
PC	PC(38:7)	91.9466	112.763	90.4806	92.4176	73.8531	78.8817	88.0717	110.367	85.457	89.2139	73.6766	79.918	1.0306	1.2371	1.19538	1.381	0.740602	0.825081	0.0326	negligible	0.00242911	0.0111207	0.297	small	0.00990974	0.0219966	0.242	small	1.21295e-07	6.235e-07	0.504	large
PC	PC(39:3)	1.32702	1.4373	1.13052	1.20807	1.15381	1.08286	1.26778	1.43724	1.13883	1.10709	1.13772	0.984577	1.11323	1.29821	1.11432	1.45975	0.0696492	0.146815	0.178	small	0.0206246	0.0604302	0.227	small	0.154829	0.233839	0.133	small	0.000284135	0.000717687	0.346	medium
PC	PC(39:4)	2.41628	2.16016	2.22939	2.12546	2.54827	2.49304	2.46107	2.1856	2.23188	2.1217	2.605	2.55694	1.10269	1.03011	0.944749	0.854769	0.119716	0.21923	0.154	small	0.744404	0.835673	0.032	negligible	0.222983	0.30964	-0.114	small	0.000683415	0.00162797	-0.324	medium
PC	PC(39:5)	0.991635	1.1423	0.870921	1.03311	1.51376	2.14723	0.925037	1.1493	0.818099	0.866627	1.46242	2.16302	1.13072	1.32618	0.632538	0.531339	0.189864	0.305661	0.129	small	0.181318	0.308873	0.131	small	0.000371511	0.00109952	-0.333	medium	1.60186e-08	1.11749e-07	-0.539	large
PC	PC(39:6)	3.02225	3.38592	2.7048	2.62431	4.46076	5.53417	2.67511	3.198	2.4278	2.28021	4.23114	5.44957	1.10187	1.4025	0.632242	0.586836	0.185429	0.303524	0.13	small	0.048186	0.111169	0.194	small	1.73608e-05	7.06489e-05	-0.403	medium	4.18492e-08	2.40428e-07	-0.522	large
PC	PC(39:7)	2.51365	3.06266	1.78753	1.96357	3.03061	2.9003	2.60833	2.99005	0.550661	0.518387	2.86416	2.48209	4.73673	5.76797	0.910681	1.20465	0.0414198	0.0940776	0.201	small	0.000618735	0.00355469	0.335	medium	0.133089	0.203099	-0.14	small	0.480475	0.565378	0.0673	negligible
PC	PC(40:1)	0.792125	1.31847	1.48903	1.47811	0.833658	1.41246	0.613419	0.810019	0.925167	1.10493	0.688957	1.05555	0.663036	0.733094	0.890359	0.767388	0.000332403	0.00165075	-0.354	medium	0.0116214	0.0400597	-0.247	small	0.181007	0.26255	-0.126	small	0.0588374	0.0907335	-0.18	small
PC	PC(40:2)	0.546815	0.932262	1.01906	0.997621	0.784537	1.19455	0.453687	0.667297	0.730932	0.769761	0.669018	0.99507	0.620696	0.866888	0.678139	0.670603	0.000136862	0.000911415	-0.375	medium	0.12069	0.22668	-0.152	small	0.000371511	0.00109952	-0.333	medium	0.00159411	0.00351184	-0.301	medium
PC	PC(40:3)	0.697422	0.842807	0.839402	0.851993	1.04964	1.18312	0.67779	0.865576	0.76824	0.803398	0.969113	1.13524	0.882263	1.07739	0.699392	0.762463	0.064705	0.139401	-0.182	small	0.984393	0.991159	0.00192	negligible	1.22314e-06	6.17899e-06	-0.454	medium	0.000114999	0.000306326	-0.368	medium
PC	PC(40:4)	4.30127	5.16864	4.80445	4.91836	4.58913	4.74295	4.38057	5.00655	4.50819	4.63467	4.42079	4.76661	0.97169	1.08024	0.990901	1.05034	0.138039	0.243649	-0.146	small	0.531336	0.662474	0.0614	negligible	0.229507	0.314232	-0.112	small	0.701967	0.770324	0.0365	negligible
PC	PC(40:5)	2.96593	4.25642	7.65202	2.75529	2.08982	1.73299	1.86056	2.72634	0.55518	0.997558	1.30148	0.392473	3.35127	2.73302	1.42957	6.94657	0.0407633	0.0933097	0.202	small	0.0412589	0.0982834	0.2	small	0.158142	0.235206	0.132	small	0.000830766	0.00193186	0.318	medium
PC	PC(40:6)	42.7599	56.1902	47.2203	50.1991	47.9358	65.67	38.8406	52.8123	46.0592	46.1376	46.6071	63.0981	0.843276	1.14467	0.833363	0.836987	0.0978681	0.188654	-0.164	small	0.0294168	0.077651	0.214	small	0.0237251	0.0476127	-0.212	small	0.00284884	0.00604863	-0.284	small
PC	PC(40:7)	49.5493	71.5143	51.4649	52.0103	45.8814	50.0842	45.2549	68.79	48.3214	51.1739	49.0079	52.8397	0.936539	1.34424	0.92342	1.30186	0.899889	0.931688	-0.0124	negligible	0.00014767	0.00103026	0.372	medium	0.605999	0.677701	0.0483	negligible	1.96254e-05	6.60946e-05	0.407	medium
PC	PC(40:8)	11.6948	15.7958	12.9153	11.9846	12.1967	10.9191	10.3861	10.108	7.5981	7.55477	8.49594	6.61265	1.36693	1.33796	1.22248	1.52858	0.438535	0.578787	0.0764	negligible	0.187791	0.314416	0.129	small	0.427471	0.505036	0.0744	negligible	0.0549451	0.0856325	0.183	small
PC	PC(40:9)	46.4288	58.6002	40.1013	41.0242	51.7941	72.83	44.9332	53.4048	38.6285	45.1059	45.5158	73.5932	1.16321	1.18399	0.9872	0.725675	0.0628102	0.136321	0.183	small	0.00981953	0.035964	0.253	small	0.304931	0.388455	-0.0965	negligible	0.0380084	0.0622149	-0.197	small
PC	PC(41:4)	0.471248	0.634097	0.297483	0.380361	0.429436	0.56744	0.185789	0.200631	0.161072	0.171671	0.174601	0.178576	1.15345	1.1687	1.06408	1.12351	0.00314685	0.0102448	0.291	small	0.0202706	0.0599929	0.227	small	0.101408	0.162363	0.154	small	0.271262	0.342585	0.105	small
PC	PC(41:5)	0.318883	0.465571	0.435082	0.458995	0.33431	0.429042	0.185083	0.390998	0.287078	0.266512	0.20071	0.294079	0.644713	1.46709	0.922144	1.32957	0.0469957	0.105112	-0.196	small	0.710139	0.803361	0.0365	negligible	0.909744	0.928763	-0.0106	negligible	0.980919	0.980919	-0.00228	negligible
PC	PC(41:8)	0.897161	1.13222	0.91836	1.00727	1.02515	1.26292	0.870776	1.08729	0.928763	0.904609	0.9418	1.24986	0.937565	1.20195	0.924587	0.869933	0.438533	0.578787	-0.0764	negligible	0.0669123	0.144157	0.179	small	0.127333	0.195332	-0.142	small	0.08616	0.128147	-0.164	small
PC	PC(42:2)	1.09161	2.17915	1.27651	1.89915	0.846317	1.90925	0.0384899	0.70701	0.826749	1.11986	0.0512574	1.05484	0.0465557	0.631339	0.750915	0.670252	0.00308001	0.0101398	-0.292	small	0.331272	0.457843	-0.0953	negligible	0.905252	0.928763	-0.0111	negligible	0.271262	0.342585	-0.105	small
PC	PC(42:4)	0.627742	0.78635	0.806777	0.90443	0.781231	0.912339	0.643525	0.758152	0.7791	0.844579	0.748227	0.866838	0.825985	0.897669	0.860066	0.874618	0.0364137	0.0853537	-0.206	small	0.137099	0.252644	-0.146	small	0.0105793	0.0233063	-0.24	small	0.0471359	0.0750596	-0.19	small
PC	PC(42:5)	0.211025	0.393157	0.389173	0.334985	0.513667	0.804295	0.0348785	0.0760062	0.0363681	0.0389288	0.392035	0.886887	0.959042	1.95244	0.0889679	0.0857	0.185429	0.303524	-0.13	small	0.237916	0.372778	0.116	small	0.000511778	0.0014281	-0.325	medium	3.60276e-05	0.000108826	-0.394	medium
PC	PC(42:6)	0.483089	0.588091	0.560924	0.362471	1.0303	1.52703	0.0333904	0.186839	0.00970541	0.00917449	0.955739	1.5627	3.44039	20.365	0.0349368	0.119561	0.765741	0.841959	-0.0294	negligible	0.262064	0.393767	0.11	small	0.000480282	0.00136624	-0.327	medium	7.64752e-08	4.22778e-07	-0.513	large
PC	PC(42:7)	2.12983	2.28073	2.0611	1.8847	2.07396	2.20419	2.11269	2.07706	2.02912	1.8908	1.9766	2.29687	1.04119	1.09851	1.06885	0.904304	0.533688	0.662587	0.0613	negligible	0.104459	0.205408	0.159	small	0.621928	0.690245	0.0462	negligible	0.640949	0.719533	-0.0444	negligible
PC	PC(42:10)	2.09564	2.38785	2.86383	2.43344	3.62329	4.51609	1.93392	1.8989	1.8408	1.81874	3.39373	4.51822	1.05059	1.04407	0.569851	0.420276	0.106191	0.198179	-0.16	small	0.989595	0.992984	0.00127	negligible	6.14117e-05	0.000216791	-0.376	medium	2.68413e-06	1.06277e-05	-0.447	medium
PC	PC(43:6)	0.821413	0.895193	0.726881	0.882703	0.849151	0.970982	0.919738	1.00764	0.831404	1.07427	0.872855	1.01191	1.10625	0.93798	1.05371	0.995776	0.520709	0.649224	0.0633	negligible	0.927264	0.96003	0.00895	negligible	0.708335	0.780233	0.035	negligible	0.834238	0.866779	-0.0199	negligible
PC	PC(44:1)	0.600389	0.933259	0.748822	1.02258	0.348794	0.655522	0.480212	0.553884	0.47164	0.814684	0.168654	0.400076	1.01817	0.679876	2.84732	1.38445	0.5079	0.641285	-0.0652	negligible	0.382254	0.511418	-0.0857	negligible	0.000825332	0.00214002	0.313	medium	0.0829265	0.123967	0.165	small
PC	PC(46:2)	0.410617	0.560399	0.776545	1.00563	0.440958	0.510191	0.316428	0.348974	0.761249	0.641111	0.0378742	0.162775	0.415669	0.544327	8.3547	2.1439	0.000846727	0.00326435	-0.329	medium	0.0152819	0.0492044	-0.238	small	0.503604	0.578651	0.0627	negligible	0.537993	0.628016	0.0587	negligible
PC	PC-O(30:0)	0.477496	0.38124	0.370768	0.364772	0.445555	0.421437	0.50407	0.351874	0.33608	0.348504	0.465784	0.409262	1.49985	1.00967	1.0822	0.859776	0.000715948	0.0028737	0.333	medium	0.774187	0.862497	0.0281	negligible	0.225144	0.309705	0.113	small	0.22713	0.298426	-0.115	small
PC	PC-O(32:1)	2.65904	2.42719	2.32779	2.27768	2.1399	2.23741	2.65618	2.37709	2.33708	2.18948	2.11393	2.21418	1.13654	1.08569	1.25652	1.07358	0.00704292	0.0202311	0.265	small	0.0474519	0.110347	0.194	small	1.97189e-05	7.91456e-05	0.4	medium	0.0673063	0.10218	0.174	small
PC	PC-O(32:3)	0.252004	0.262933	0.19972	0.205545	0.221834	0.267219	0.268337	0.251899	0.187647	0.208127	0.225747	0.256334	1.43001	1.21031	1.18866	0.982698	0.00020904	0.00117786	0.366	medium	0.0155581	0.0495491	0.237	small	0.0688426	0.119356	0.17	small	0.671187	0.747748	-0.0405	negligible
PC	PC-O(34:0)	0.48859	0.462353	0.441358	0.317476	0.602446	0.452881	0.442745	0.34623	0.275809	0.0405596	0.594617	0.320088	1.60526	8.53634	0.744588	1.08167	0.495255	0.628181	0.0672	negligible	0.262064	0.393767	0.11	small	0.119064	0.185563	-0.146	small	0.852952	0.879982	-0.0176	negligible
PC	PC-O(34:1)	6.67191	6.12259	6.21423	6.0029	5.08052	4.98927	6.27334	5.79434	6.21337	5.69912	4.87998	4.92634	1.00965	1.01671	1.28552	1.17619	0.164396	0.27683	0.137	small	0.485366	0.623738	0.0684	negligible	4.36681e-08	2.9079e-07	0.513	large	0.000104256	0.000285487	0.37	medium
PC	PC-O(34:2)	11.4045	9.97956	11.219	11.0511	9.45398	9.39698	11.2768	9.71539	10.5054	9.77901	9.39278	8.99246	1.07343	0.993494	1.20058	1.08039	0.564588	0.6778	0.0568	negligible	0.192198	0.319966	-0.127	small	0.00567441	0.0134081	0.259	small	0.329757	0.409402	0.093	negligible
PC	PC-O(34:3)	10.661	9.56054	10.9393	10.6292	10.7197	9.99086	11.0854	9.26839	10.699	10.4389	11.1	9.79066	1.03612	0.887867	0.998682	0.946656	0.868528	0.905618	-0.0164	negligible	0.0324569	0.0826946	-0.21	small	0.936752	0.946442	-0.00744	negligible	0.549896	0.636836	-0.057	negligible
PC	PC-O(34:4)	2.0717	1.93016	1.79926	1.78413	1.69548	1.7935	1.98447	1.94961	1.75989	1.81678	1.63188	1.72166	1.12761	1.07311	1.21606	1.1324	0.00926555	0.0256114	0.256	small	0.168874	0.294524	0.135	small	0.000110812	0.000368953	0.362	medium	0.10775	0.154759	0.154	small
PC	PC-O(35:3)	1.23935	1.24287	1.3493	1.35462	1.40086	1.44146	1.2249	1.2216	1.30136	1.29443	1.2887	1.46184	0.941246	0.943731	0.950493	0.835654	0.343728	0.486533	-0.0933	negligible	0.324818	0.451051	-0.0966	negligible	0.184729	0.266628	-0.125	small	0.00739152	0.0138828	-0.256	small
PC	PC-O(36:2)	3.2429	2.74481	3.19552	2.93589	3.19136	2.75296	3.10155	2.58433	3.08111	2.88622	3.10943	2.79133	1.00663	0.895404	0.997463	0.92584	0.720687	0.805959	0.0353	negligible	0.203548	0.33133	-0.125	small	0.605999	0.677701	0.0483	negligible	0.87646	0.901063	-0.0148	negligible
PC	PC-O(36:3)	8.34295	7.67765	8.36806	8.5298	7.76341	7.12707	8.19828	7.38709	7.74885	7.9562	7.91701	7.12523	1.058	0.92847	1.03553	1.03675	0.827042	0.874813	0.0215	negligible	0.107274	0.206784	-0.158	small	0.24296	0.325056	0.11	small	0.188372	0.253179	0.126	small
PC	PC-O(36:4)	23.3704	23.9278	23.0521	24.3265	16.2467	16.2412	23.2483	23.6499	20.9363	23.0812	16.6317	15.7074	1.11043	1.02464	1.39783	1.50565	0.393034	0.533145	0.0841	negligible	0.958398	0.973563	0.00512	negligible	1.3456e-10	1.57704e-09	0.601	large	4.39477e-12	6.13174e-11	0.66	large
PC	PC-O(36:5)	18.6481	19.7904	18.5064	19.9778	14.2775	15.8625	18.2223	19.3305	18.0965	19.1051	14.2805	15.6037	1.00695	1.0118	1.27603	1.23884	0.54243	0.667782	0.06	negligible	0.891085	0.942556	0.0134	negligible	6.47215e-07	3.44789e-06	0.466	medium	1.53975e-05	5.37081e-05	0.412	medium
PC	PC-O(36:6)	6.27973	5.92682	5.99809	6.23145	6.40772	6.70312	6.63304	5.71115	5.61874	5.97638	6.50412	6.33413	1.18052	0.95562	1.01982	0.901648	0.37853	0.525636	0.0868	negligible	0.299847	0.430663	-0.102	small	0.9548	0.961362	-0.00531	negligible	0.0777582	0.117439	-0.168	small
PC	PC-O(37:6)	0.744579	0.815568	0.790177	0.850826	0.844429	0.948441	0.741833	0.814344	0.745743	0.820553	0.82915	0.884561	0.994757	0.992432	0.894691	0.920619	0.512151	0.641285	-0.0645	negligible	0.579411	0.698276	-0.0543	negligible	0.0741901	0.127869	-0.168	small	0.00640117	0.0121003	-0.26	small
PC	PC-O(38:3)	1.06313	0.756943	0.519974	0.551944	1.17392	0.756478	1.0326	0.706102	0.17547	0.198466	1.12609	0.695509	5.88475	3.55781	0.916972	1.01523	0.000136868	0.000911415	0.375	medium	0.0504473	0.112832	0.192	small	0.225144	0.309705	-0.113	small	0.829573	0.865	0.0205	negligible
PC	PC-O(38:4)	10.533	10.4938	10.8041	10.9012	8.80869	7.98846	10.4315	10.3468	9.8033	10.208	8.79443	7.60153	1.06408	1.0136	1.18615	1.36115	0.775867	0.841959	0.0281	negligible	0.583882	0.698276	-0.0537	negligible	3.02344e-05	0.000116562	0.391	medium	1.33759e-07	6.64262e-07	0.502	large
PC	PC-O(38:5)	20.8146	21.3982	21.0236	22.0708	15.5021	16.3115	20.5625	21.3197	20.3467	21.0586	15.6271	15.4871	1.01061	1.0124	1.31582	1.37661	0.941939	0.958293	0.00717	negligible	0.592867	0.703281	-0.0525	negligible	1.10707e-09	1.04636e-08	0.57	large	2.34342e-08	1.52583e-07	0.532	large
PC	PC-O(38:6)	12.595	12.9455	12.2402	13.0723	11.4952	13.6564	12.4488	12.2642	11.8775	12.6855	11.6827	13.7121	1.04811	0.966786	1.06558	0.89441	0.430747	0.573676	0.0776	negligible	0.865377	0.925384	-0.0167	negligible	0.0760461	0.129544	0.166	small	0.111732	0.159695	-0.152	small
PC	PC-O(40:4)	1.06992	0.870134	0.935758	0.720632	0.959287	0.595132	1.08893	0.882261	0.879307	0.746311	1.05302	0.385532	1.2384	1.18216	1.0341	2.28843	0.14159	0.246942	0.145	small	0.084	0.1758	0.17	small	0.231711	0.314314	0.112	small	0.000548379	0.00133896	0.33	medium
PC	PC-O(40:5)	2.49262	2.08903	2.41925	2.22514	2.33822	2.07689	2.4672	1.93108	2.14952	2.06884	2.22397	1.99275	1.14779	0.933411	1.10937	0.969049	0.411632	0.553249	0.0809	negligible	0.449419	0.587855	-0.0741	negligible	0.125924	0.194189	0.143	small	0.815616	0.853485	0.0222	negligible
PC	PC-O(40:6)	3.87544	3.78391	3.78147	3.75887	4.37381	4.82907	3.85918	3.76475	3.7373	3.66064	4.49506	4.89343	1.03261	1.02844	0.858538	0.769348	0.495255	0.628181	0.0672	negligible	0.583882	0.698276	0.0537	negligible	0.00640425	0.0148924	-0.256	small	1.24037e-06	5.35061e-06	-0.462	medium
PC	PC-O(40:7)	8.48655	8.45952	7.8039	7.97533	8.06146	8.69937	8.46711	8.51433	7.90689	7.79603	8.21047	8.75199	1.07085	1.09214	1.03126	0.972845	0.042758	0.09637	0.2	small	0.19668	0.323749	0.126	small	0.40473	0.484024	0.078	negligible	0.234105	0.303508	-0.113	small
PC	PC-O(40:8)	11.1126	11.021	9.40962	10.3822	8.17295	8.33505	10.4557	10.5039	9.94999	10.4761	8.16389	8.08066	1.05082	1.00265	1.28072	1.29988	0.0314078	0.0754302	0.212	small	0.539924	0.667501	0.0601	negligible	1.76892e-06	8.49664e-06	0.448	medium	3.38766e-06	1.30603e-05	0.443	medium
PC	PC-O(42:4)	0.435389	0.308167	0.322003	0.209858	0.336434	0.165476	0.403408	0.135813	0.215919	0.0382749	0.304922	0.0348285	1.86833	3.54836	1.32299	3.89948	0.158451	0.269919	0.139	small	0.227704	0.362594	0.119	small	0.231713	0.314314	0.112	small	0.00851795	0.0157959	0.251	small
PC	PC-O(42:5)	1.57151	1.15381	1.19722	1.07421	1.23175	0.967263	1.58022	1.14276	1.18285	1.07187	1.17728	0.971776	1.33594	1.06614	1.34226	1.17595	0.000575304	0.00244296	0.339	medium	0.270475	0.402281	0.108	small	0.000340693	0.0010291	0.335	medium	0.0342923	0.0567663	0.202	small
PC	PC-O(42:6)	1.12502	0.897003	0.954055	0.849992	1.11478	1.07239	1.15799	0.928652	0.961627	0.881724	1.0617	1.066	1.2042	1.05322	1.09069	0.87116	0.0171439	0.0452537	0.235	small	0.527066	0.659959	0.062	negligible	0.45435	0.528272	0.0701	negligible	0.0604567	0.0922595	-0.179	small
Cer	Cer(40:1)	0.630506	0.767599	0.744741	0.795054	0.866871	0.960937	0.675667	0.768756	0.774436	0.755309	0.871298	0.9685	0.872463	1.0178	0.775471	0.79376	0.0407633	0.0933097	-0.202	small	0.681224	0.782741	-0.0403	negligible	4.91348e-06	2.14873e-05	-0.428	medium	0.00156169	0.00351184	-0.301	medium
Cer	Cer(41:1)	0.929349	1.11204	1.0491	1.22507	1.04467	1.20976	0.99699	1.09311	1.05009	1.18487	1.04835	1.17953	0.949433	0.922553	0.951006	0.926727	0.230752	0.357726	-0.118	small	0.305968	0.433085	-0.1	small	0.0808521	0.135371	-0.164	small	0.167224	0.228956	-0.132	small
Cer	Cer(42:1)	2.81634	3.38818	3.24713	3.5991	2.52204	2.76202	2.94926	3.4202	2.95633	3.36788	2.50907	2.72915	0.99761	1.01553	1.17544	1.25321	0.0839684	0.172047	-0.17	small	0.634076	0.746121	-0.0467	negligible	0.014799	0.0311949	0.229	small	8.55455e-05	0.000243348	0.375	medium
Cer	Cer(42:2)	2.13722	2.69182	2.19166	2.65373	1.75419	2.16989	2.1957	2.68301	2.21909	2.43751	1.74193	2.16389	0.989458	1.10072	1.2605	1.2399	0.989434	0.992823	0.0013	negligible	0.385817	0.513839	0.085	negligible	1.30808e-05	5.39815e-05	0.408	medium	2.63016e-05	8.28641e-05	0.4	medium
Cer	Cer(43:1)	0.57695	0.638234	0.588934	0.648223	0.605067	0.632097	0.580133	0.648011	0.550541	0.635847	0.631971	0.643539	1.05375	1.01913	0.917974	1.00695	0.81674	0.8702	0.0229	negligible	0.794231	0.874849	0.0256	negligible	0.450938	0.528272	-0.0706	negligible	0.783285	0.834555	0.0262	negligible
SM	SM(30:1)	0.391578	0.498961	0.356037	0.399348	0.494616	0.615014	0.39456	0.490567	0.359384	0.392309	0.46962	0.618073	1.09788	1.25046	0.840168	0.793705	0.382124	0.528124	0.0861	negligible	0.00152978	0.00747063	0.311	medium	0.00990974	0.0219966	-0.242	small	0.000639948	0.00153692	-0.325	medium
SM	SM(31:0)	0.593536	0.729835	0.505423	0.851816	0.538973	0.615143	0.319244	0.549459	0.378039	0.695499	0.459772	0.471368	0.844473	0.790021	0.694353	1.16567	0.307894	0.451064	-0.101	small	0.681225	0.782741	-0.0403	negligible	0.39521	0.478498	-0.0796	negligible	0.372988	0.455356	0.085	negligible
SM	SM(32:1)	8.70377	10.2855	8.9444	9.75154	10.8431	13.3893	8.99236	10.404	8.00292	9.28067	10.3881	13.3677	1.12363	1.12104	0.86564	0.778291	0.827042	0.874813	0.0215	negligible	0.137101	0.252644	0.146	small	0.000127304	0.000414444	-0.359	medium	2.31649e-07	1.11267e-06	-0.493	medium
SM	SM(33:1)	10.2546	11.1142	9.95766	10.5777	10.941	12.1101	10.0385	11.0888	9.73755	10.4908	11.1434	11.7922	1.03091	1.057	0.90085	0.940352	0.295497	0.44174	0.103	small	0.318453	0.444317	0.0979	negligible	0.103794	0.164388	-0.153	small	0.0512708	0.0807653	-0.186	small
SM	SM(33:2)	15.1892	14.0215	19.1763	21.6498	25.3063	26.2115	5.49	4.865	17.2	20.25	27	25.25	0.319186	0.240247	0.203333	0.192673	0.0272336	0.0665085	-0.218	small	0.00859339	0.0326995	-0.258	small	0.00424236	0.0101886	-0.268	small	0.000786995	0.00184472	-0.32	medium
SM	SM(34:1)	115.179	125.476	118.053	124.749	115.052	132.743	116.48	120.934	111.133	124.4	110.699	128.286	1.04811	0.972138	1.05222	0.942689	0.858116	0.897959	-0.0176	negligible	0.469194	0.608302	0.071	negligible	0.936752	0.946442	0.00744	negligible	0.125852	0.176434	-0.146	small
SM	SM(34:2)	15.2578	18.6174	16.8252	19.5773	16.0455	20.6995	15.8921	18.3551	16.1096	19.369	16.1939	20.7546	0.986496	0.947655	0.981365	0.88439	0.228183	0.355632	-0.119	small	0.574955	0.698276	-0.055	negligible	0.296983	0.383333	-0.0974	negligible	0.020671	0.0356286	-0.22	small
SM	SM(35:1)	3.02475	3.46234	3.2181	3.26795	3.73108	4.51974	2.96221	3.5584	2.90279	3.23369	3.6605	4.41107	1.02047	1.10041	0.809238	0.806697	0.666924	0.760345	-0.0424	negligible	0.281977	0.415176	0.106	small	4.70818e-05	0.000170308	-0.381	medium	1.0993e-07	5.85626e-07	-0.506	large
SM	SM(36:1)	37.9178	45.9613	40.2622	43.2925	36.637	45.0037	37.8147	45.7232	37.2088	42.1012	36.7738	44.6835	1.01628	1.08603	1.0283	1.02327	0.715737	0.80349	-0.0359	negligible	0.0976796	0.196028	0.163	small	0.352599	0.435913	0.0871	negligible	0.715315	0.779135	0.0348	negligible
SM	SM(36:2)	5.83739	7.269	6.31146	6.99263	6.37579	7.69614	5.70168	7.35411	6.05143	6.83405	6.22023	7.60343	0.942203	1.0761	0.916634	0.967209	0.27754	0.425755	-0.107	small	0.235332	0.370711	0.117	small	0.105004	0.16541	-0.152	small	0.376203	0.455487	-0.0844	negligible
SM	SM(37:1)	2.11462	2.81852	2.40358	2.46785	2.66651	3.67131	2.01846	2.74461	2.11767	2.50069	2.81094	3.60722	0.95315	1.09754	0.718074	0.760866	0.596326	0.698894	-0.0522	negligible	0.137099	0.252644	0.146	small	0.000760379	0.00198921	-0.316	medium	2.18413e-05	7.11057e-05	-0.405	medium
SM	SM(38:1)	18.5324	22.0378	20.7942	21.9087	22.3988	26.5384	18.4278	21.2294	19.3546	20.5157	21.1593	26.0602	0.952114	1.03479	0.870908	0.814631	0.115065	0.212038	-0.156	small	0.690809	0.787582	0.039	negligible	0.00048027	0.00136624	-0.327	medium	0.000625957	0.00151575	-0.326	medium
SM	SM(38:2)	8.63946	10.4141	9.70539	10.6528	13.2488	16.6282	8.74619	10.2175	8.73623	10.0355	12.365	16.3866	1.00114	1.01814	0.707336	0.623529	0.103356	0.194125	-0.161	small	0.922085	0.96003	0.00959	negligible	6.09126e-13	1.04985e-11	-0.674	large	3.26761e-12	5.03899e-11	-0.665	large
SM	SM(38:3)	0.329893	0.530044	0.392354	0.475975	2.7102	3.72079	0.0326917	0.0349308	0.0349853	0.0346775	2.06589	3.55855	0.934443	1.00731	0.0158246	0.00981603	0.638284	0.742132	-0.0463	negligible	0.948011	0.973563	0.00639	negligible	1.5883e-14	3.10249e-13	-0.719	large	6.05633e-15	1.47875e-13	-0.744	large
SM	SM(39:1)	5.55486	7.01305	7.27688	7.83123	8.20217	9.98537	5.54294	7.06304	7.21177	7.12954	7.98992	9.78631	0.768596	0.990672	0.693741	0.721726	0.00017857	0.00106778	-0.369	medium	0.290821	0.421835	-0.104	small	5.84659e-09	4.89443e-08	-0.545	large	1.44258e-08	1.03091e-07	-0.541	large
SM	SM(39:2)	1.17113	1.63591	1.3517	1.60549	3.18055	4.28342	1.09256	1.40418	1.05336	1.21976	2.86253	4.30802	1.03721	1.1512	0.381675	0.325947	0.582626	0.688345	0.0542	negligible	0.37169	0.504191	0.0876	negligible	3.1808e-17	1.16497e-15	-0.79	large	2.99639e-13	5.48713e-12	-0.695	large
SM	SM(40:1)	7.42587	11.7117	25.7856	16.0847	14.7561	24.4913	2.94688	6.73811	2.41257	2.6046	8.71941	13.3853	1.22147	2.587	0.337968	0.503398	0.560124	0.675375	-0.0574	negligible	0.514367	0.654935	-0.0639	negligible	0.0349865	0.0670003	-0.198	small	0.0173267	0.0305827	-0.227	small
SM	SM(40:2)	24.4464	28.7561	24.9321	27.5148	37.0113	48.8888	23.9443	28.785	26.3068	27.3906	35.3416	47.007	0.910195	1.05091	0.677511	0.612356	0.295497	0.44174	-0.103	small	0.315302	0.442027	0.0981	negligible	1.14495e-08	8.60181e-08	-0.535	large	2.22634e-12	3.62399e-11	-0.669	large
SM	SM(40:4)	7.45731	9.85126	5.7414	7.16703	10.12	11.5128	7.93832	9.72387	4.2209	5.50603	10.3012	11.4116	1.88072	1.76604	0.770619	0.852103	0.00459929	0.0138927	0.279	small	0.00178817	0.00845052	0.306	medium	0.000951528	0.00242433	-0.309	medium	0.0210016	0.0357765	-0.22	small
SM	SM(41:1)	13.955	16.825	17.8032	18.5369	15.7437	19.21	14.0386	15.7262	17.6363	17.8582	15.5515	18.9633	0.796005	0.880614	0.902716	0.829297	0.000358634	0.00175133	-0.352	medium	0.0474531	0.110347	-0.194	small	0.0145686	0.0309318	-0.229	small	0.00263403	0.00567478	-0.287	small
SM	SM(41:2)	13.238	15.6049	15.378	16.947	15.4435	19.6906	13.1447	15.1538	14.2241	15.5959	15.3179	19.1866	0.924113	0.97165	0.858125	0.789811	0.026549	0.066486	-0.219	small	0.357886	0.487723	-0.0901	negligible	0.000490548	0.00138203	-0.327	medium	4.3905e-06	1.64925e-05	-0.438	medium
SM	SM(42:1)	20.8665	25.7436	22.4724	22.8134	18.9435	20.3396	21.4748	24.9072	24.0842	25.3116	19.8135	21.3467	0.891654	0.984024	1.08385	1.16679	0.206001	0.328034	-0.124	small	0.177097	0.305231	0.132	small	0.0945089	0.15299	0.156	small	0.00152984	0.00347476	0.302	medium
SM	SM(42:2)	69.7967	78.966	71.8925	78.1115	50.2321	63.8051	68.6581	79.3855	72.2498	73.3538	49.5676	62.5359	0.950288	1.08223	1.38514	1.26944	0.614819	0.717698	-0.0496	negligible	0.403928	0.533112	0.0819	negligible	3.72521e-11	4.74559e-10	0.619	large	9.93471e-06	3.59367e-05	0.421	medium
SM	SM(42:3)	29.6525	34.8646	26.6204	31.8436	26.1085	31.9376	30.7787	34.7576	28.8125	30.8649	26.2742	34.1891	1.06824	1.12612	1.17144	1.01663	0.347116	0.488966	0.0926	negligible	0.0496842	0.112832	0.192	small	0.0282685	0.0555884	0.205	small	0.392542	0.473312	0.0815	negligible
SM	SM(43:1)	4.82561	7.34802	7.98373	8.14478	5.14848	8.19335	3.92064	4.92799	5.45326	6.25314	4.36211	7.40161	0.718954	0.788082	0.898796	0.665799	0.027466	0.0665085	-0.217	small	0.157083	0.278942	-0.138	small	0.447541	0.526625	-0.0712	negligible	0.0808271	0.121448	-0.167	small
SM	SM(44:1)	1.06061	1.51199	1.74043	1.7656	1.29081	2.06444	0.947013	1.24326	1.40756	1.46687	1.20524	1.90134	0.672806	0.847557	0.785749	0.653886	0.0003002	0.00154313	-0.357	medium	0.0794277	0.167427	-0.172	small	0.0286793	0.0560202	-0.205	small	0.000114999	0.000306326	-0.368	medium
SM	SM(44:2)	1.55307	1.62788	1.44932	1.68191	1.34943	1.90088	1.5516	1.50646	1.38489	1.53281	1.23886	1.87741	1.12038	0.982814	1.25245	0.802416	0.172582	0.28731	0.134	small	0.794231	0.874849	-0.0256	negligible	0.0413007	0.0780717	0.191	small	0.0952796	0.140995	-0.159	small
Hexoses	H1	6862.34	7578.01	5851.69	5837.93	6722.69	7177.17	6746.31	7427.7	5719.36	5660.2	6521.78	7010.44	1.17956	1.31227	1.03443	1.05952	3.54987e-07	5.47427e-06	0.502	large	1.28261e-10	6.2634e-09	0.631	large	0.278987	0.366561	0.101	small	0.0541942	0.0849139	0.184	small
Total	Acylcarnitines	95.4149	116.288	96.5823	103.623	103.902	108.897	89.7978	110.943	97.0605	103.229	105.257	111.061	0.925173	1.07472	0.853128	0.998939	0.491078	0.628181	-0.0679	negligible	0.0109906	0.0387981	0.249	small	0.0622111	0.111145	-0.174	small	0.209254	0.277428	0.12	small
Total	Diglicerides	77.7536	100.034	121.229	127.147	97.0907	129.724	73.8702	100.516	108.579	115.993	89.174	121.715	0.680337	0.866572	0.828383	0.825834	1.75044e-07	3.20549e-06	-0.514	large	0.00103875	0.00553372	-0.322	medium	0.000387874	0.00113647	-0.332	medium	8.77035e-05	0.000247088	-0.374	medium
Total	Triglicerides	1177.71	1603.65	1745.49	2030.48	1212.17	1625.08	1047.82	1534.63	1500.25	1658.43	1113.39	1571.16	0.698432	0.92535	0.941106	0.976749	0.000164948	0.00102829	-0.371	medium	0.0363418	0.0902385	-0.205	small	0.507227	0.580537	-0.0621	negligible	0.815617	0.853485	-0.0222	negligible
Total	Lysophosphatidylcholines	176.91	183.828	248.92	255.056	297.75	294.595	176.47	172.156	246.584	256.256	293.601	290.625	0.715659	0.671812	0.601054	0.592364	2.07139e-09	6.74353e-08	-0.59	large	6.25582e-09	1.66632e-07	-0.57	large	2.88936e-15	6.51217e-14	-0.74	large	7.78424e-14	1.52052e-12	-0.712	large
Total	Phosphatidylcholines	2182.51	2453.15	2276.34	2360.4	2072.76	2319.86	2120.93	2386.11	2114.02	2261.39	2067.66	2344.96	1.00327	1.05515	1.02576	1.01755	0.560124	0.675375	-0.0574	negligible	0.245784	0.381031	0.114	small	0.324015	0.409209	0.0923	negligible	0.213625	0.281946	0.118	small
Total	Sphingomyelins	442.969	514.697	487.333	516.663	474.52	580.465	452.948	496.489	470.941	495.838	469.039	576.614	0.961793	1.00131	0.965695	0.861042	0.0913376	0.17961	-0.167	small	0.850019	0.919024	0.0185	negligible	0.082843	0.136365	-0.162	small	0.00426286	0.00855491	-0.273	small
Total	Ceramides	7.09037	8.59788	7.82156	8.92118	6.79284	7.7347	7.32919	8.25469	7.59657	8.29866	6.59698	7.75558	0.964803	0.994701	1.11099	1.06435	0.228187	0.355632	-0.119	small	0.744405	0.835673	-0.032	negligible	0.204212	0.290456	0.119	small	0.0557068	0.0863602	0.182	small
Total	Cholesteryl:Esters	9547.12	10816.3	9651.91	10880.6	9675.94	11039.2	9469.17	10742.2	9199.16	10691.8	9598.91	10613.3	1.02935	1.00471	0.986484	1.01214	0.931407	0.950879	0.00848	negligible	0.963594	0.973563	0.00447	negligible	0.82505	0.871088	-0.0207	negligible	0.928536	0.938141	-0.00855	negligible
Total	Lipids	13707.5	15796.5	14635.6	16282.9	13940.9	16105.6	13698.8	15178.4	14190.3	15382.9	13823.1	15334.4	0.965361	0.986702	0.991007	0.989824	0.187637	0.303744	-0.13	small	0.671688	0.777883	-0.0416	negligible	0.768194	0.836731	-0.0276	negligible	0.737752	0.797644	-0.0319	negligible
